# Supplementary material for: Global molecular changes in a tibial compression induced ACL rupture model of post‐traumatic osteoarthritis
Source: PubMed Central journal article supplement — J Orthop Res. 2016 May 10;35(3):474–85. doi: 10.1002/jor.23263 (PMC5363336; doi:10.1002/jor.23263), 2016-05-10
Supplement: JOR-35-474-s001.pdf [file JOR-35-474-s001.pdf]

**Supplementary Table S1.** Differentially up- and down-regulated genes identified at 1 day, 1-, 6-, and 12-weeks post injury. Differentially expressed genes in the TC data that were also identified in DMM injured joints [Whole Joint RNA] and [micro-dissected cartilage RNA] are highlighted .

TC genes present in whole joint DMM data

TC genes present only in cartilage DMM data

\*genes with opposite expression patterns between TC and DMM models

| No. | Gene Name        | TC-whole joint |        |         |          | DMM-whole joint |         |          | DMM-cartilage |         |         |
|-----|------------------|----------------|--------|---------|----------|-----------------|---------|----------|---------------|---------|---------|
|     |                  | 1 Day          | 1 Week | 6 Weeks | 12 Weeks | 2 Weeks         | 4 Weeks | 16 Weeks | 1 Week        | 2 Weeks | 6 Weeks |
| 1   | <i>Arg1</i>      | 4.591          | ns     | ns      | ns       |                 |         |          |               |         |         |
| 2   | <i>Ccl7</i>      | 3.941          | 2.117  | ns      | ns       |                 | 1.123   |          |               |         |         |
| 3   | <i>Saa3</i>      | 3.741          | ns     | ns      | ns       |                 | 3.351   |          |               |         |         |
| 4   | <i>Ccl2</i>      | 3.556          | ns     | ns      | ns       | 1.258           |         |          |               |         |         |
| 5   | <i>Chl1</i>      | 3.03           | ns     | ns      | ns       |                 | 2.142   |          |               |         |         |
| 6   | <i>Serpine1</i>  | 3.03           | 1.955  | ns      | ns       |                 | 1.234   |          | 1.377         |         |         |
| 7   | <i>Ptx3</i>      | 2.819          | 1.114  | ns      | ns       | 1.696           | 0.925   |          |               |         |         |
| 8   | <i>Cxcl1</i>     | 2.808          | ns     | ns      | ns       |                 | 2.357   |          |               |         |         |
| 9   | <i>Cxcl5</i>     | 2.723          | ns     | ns      | ns       |                 | 2.269   |          |               |         |         |
| 10  | <i>Crff1</i>     | 2.668          | 2.306  | ns      | ns       | 1.395           | 1.143   |          | 3.683         | 2.762   |         |
| 11  | <i>Il6</i>       | 2.588          | ns     | ns      | ns       |                 |         |          |               |         |         |
| 12  | <i>P4ha3</i>     | 2.582          | 2.624  | ns      | ns       | 1.039           | 1.217   |          |               |         |         |
| 13  | <i>C3ar1</i>     | 2.506          | 1.414  | ns      | ns       |                 | 0.620   |          |               |         |         |
| 14  | <i>Fcrls</i>     | 2.476          | 1.574  | ns      | ns       |                 | 0.775   |          |               |         |         |
| 15  | <i>Mt2</i>       | 2.417          | 1.096  | ns      | ns       | 1.330           | 1.063   |          |               | 1.422   |         |
| 16  | <i>Timp1</i>     | 2.32           | 1.512  | ns      | ns       | 1.533           | 1.888   |          | 1.742         | 1.708   |         |
| 17  | <i>Has2</i>      | 2.31           | 1.563  | ns      | ns       |                 | 0.901   |          |               | 0.952   |         |
| 18  | <i>Sfrp1</i>     | 2.301          | 1.988  | ns      | ns       | 1.314           | 1.036   |          |               |         |         |
| 19  | <i>Tnfaip6</i>   | 2.258          | 1.985  | ns      | ns       |                 | 2.314   |          |               | 3.505   |         |
| 20  | <i>Fbln2</i>     | 2.251          | 1.431  | ns      | ns       | 1.129           | 0.880   |          |               | 0.901   |         |
| 21  | <i>Trem2</i>     | 2.229          | 0.996  | ns      | ns       |                 |         |          |               |         |         |
| 22  | <i>Serpina3n</i> | 2.208          | 1.233  | 1.301   | ns       |                 | 0.772   |          | 2.329         | 2.311   |         |
| 23  | <i>Mmp3</i>      | 2.156          | 2.506  | 3.554   | 2.618    | 2.714           | 3.514   |          | 3.165         | 4.401   | 2.650   |
| 24  | <i>Ankrd1</i>    | 2.155          | ns     | ns      | ns       |                 |         |          |               |         |         |
| 25  | <i>Rrad</i>      | 2.14           | ns     | ns      | ns       | 0.748           | 1.006   |          |               |         |         |
| 26  | <i>Crabp2</i>    | 2.132          | 2.925  | ns      | ns       | 2.251           | 1.899   |          |               |         |         |
| 27  | <i>Vgll3</i>     | 2.125          | 1.482  | ns      | ns       | 1.484           | 1.469   |          |               |         |         |
| 28  | <i>Pdpn</i>      | 2.075          | 1.525  | 1.278   | ns       |                 | 1.366   |          |               |         |         |
| 29  | <i>Chrna1</i>    | 2.046          | 0.81   | ns      | ns       |                 |         |          |               |         |         |
| 30  | <i>Col3a1</i>    | 2.037          | 2.522  | 2.017   | 1.976    |                 | 1.825   | 2.192    |               |         |         |
| 31  | <i>Eda2r</i>     | 2.022          | ns     | ns      | ns       |                 |         |          |               |         |         |
| 32  | <i>Tnnt2</i>     | 2.012          | ns     | ns      | ns       |                 |         |          |               |         |         |
| 33  | <i>Steap1</i>    | 1.963          | 1.333  | ns      | ns       |                 | 1.870   |          | 2.011         | 1.911   |         |
| 34  | <i>Angptl4</i>   | 1.959          | 0.833  | ns      | 1.304    | 1.223           | 1.095   |          |               |         |         |
| 35  | <i>Klrb1b</i>    | 1.94           | ns     | ns      | ns       |                 |         |          |               |         |         |
| 36  | <i>Prrx2</i>     | 1.938          | 1.909  | ns      | ns       | 1.439           | 1.441   | 0.947    |               |         |         |
| 37  | <i>Cthrc1</i>    | 1.935          | 2.337  | 0.894   | 1.548    | 1.477           | 1.684   |          |               |         |         |
| 38  | <i>Apln</i>      | 1.906          | ns     | ns      | ns       |                 |         |          |               |         |         |
| 39  | <i>Ltbp2</i>     | 1.904          | 0.839  | ns      | ns       |                 | 0.922   |          | 1.096         | 1.731   |         |
| 40  | <i>Postn</i>     | 1.856          | 1.925  | 1.167   | ns       |                 | 1.402   |          |               |         |         |
| 41  | <i>Nxpe5</i>     | 1.855          | ns     | ns      | ns       |                 |         |          |               |         |         |
| 42  | <i>Csrp2</i>     | 1.816          | 1.449  | ns      | ns       | 1.100           | 0.793   |          |               |         |         |
| 43  | <i>Ms4a7</i>     | 1.803          | 0.886  | ns      | ns       |                 |         |          |               |         |         |
| 44  | <i>Sod3</i>      | 1.795          | 1.617  | 0.854   | ns       | 0.865           | 1.091   |          | 0.692         | 0.964   |         |
| 45  | <i>Dclk1</i>     | 1.786          | 1.667  | ns      | ns       | 1.406           | 1.716   |          |               |         |         |
| 46  | <i>Pcsk5</i>     | 1.778          | 0.871  | ns      | ns       |                 | 1.484   |          |               | 1.634   |         |
| 47  | <i>Bmper</i>     | 1.774          | 1.587  | ns      | ns       |                 | 1.235   |          |               |         |         |
| 48  | <i>Sfrp2</i>     | 1.772          | 2.205  | 1.668   | 1.599    | 1.149           | 1.408   | 1.379    |               |         |         |
| 49  | <i>Ms4a6d</i>    | 1.771          | 0.751  | ns      | 1.733    |                 |         |          |               |         |         |
| 50  | <i>Cxcl16</i>    | 1.766          | 0.93   | ns      | ns       |                 |         |          |               |         |         |
| 51  | <i>Dpep2</i>     | 1.747          | ns     | ns      | ns       |                 |         |          |               |         |         |
| 52  | <i>Msr1</i>      | 1.736          | ns     | ns      | ns       |                 | 0.765   |          |               |         |         |
| 53  | <i>Cyp7b1</i>    | 1.734          | ns     | ns      | ns       |                 | 1.022   |          |               |         |         |
| 54  | <i>Has1</i>      | 1.728          | 2.337  | ns      | ns       |                 | 1.270   |          |               | 3.805   |         |
| 55  | <i>Slc16a2</i>   | 1.726          | 1.905  | ns      | ns       | 1.064           | 1.164   |          |               |         |         |
| 56  | <i>Kcne4</i>     | 1.722          | 1.287  | ns      | ns       |                 | 0.818   |          |               |         |         |

| No. | Gene Name         | TC-whole joint |        |         |          | DMM-whole joint |         |          | DMM-cartilage |         |         |
|-----|-------------------|----------------|--------|---------|----------|-----------------|---------|----------|---------------|---------|---------|
|     |                   | 1 Day          | 1 Week | 6 Weeks | 12 Weeks | 2 Weeks         | 4 Weeks | 16 Weeks | 1 Week        | 2 Weeks | 6 Weeks |
| 57  | <i>Akr1b8</i>     | 1.721          | 1.486  | ns      | ns       | 0.901           | 1.029   |          | 1.171         |         |         |
| 58  | <i>Prune2</i>     | 1.718          | ns     | ns      | ns       |                 | 0.636   |          |               |         |         |
| 59  | <i>Galnt16</i>    | 1.698          | 1.89   | ns      | ns       |                 |         |          |               |         |         |
| 60  | <i>Ccr5</i>       | 1.667          | ns     | ns      | ns       |                 |         |          |               |         |         |
| 61  | <i>Mustn1</i>     | 1.665          | ns     | ns      | ns       |                 |         |          |               |         |         |
| 62  | <i>AW551984</i>   | 1.661          | 2.202  | ns      | ns       | 1.297           | 1.595   |          |               |         |         |
| 63  | <i>Fbn1</i>       | 1.639          | 1.566  | ns      | ns       | 0.914           | 1.466   |          |               |         |         |
| 64  | <i>Lrrc17</i>     | 1.637          | 0.971  | ns      | ns       | 1.068           | 1.246   |          |               |         |         |
| 65  | <i>Wisp2</i>      | 1.623          | 1.415  | 0.856   | 1.416    | 1.451           | 1.324   |          |               |         |         |
| 66  | <i>Aldh1a2</i>    | 1.608          | ns     | ns      | ns       |                 |         |          |               |         |         |
| 67  | <i>Ccl8</i>       | 1.605          | 1.85   | ns      | ns       |                 |         |          |               |         |         |
| 68  | <i>Figf</i>       | 1.582          | ns     | ns      | ns       | 0.654           |         |          |               |         |         |
| 69  | <i>Fam57a</i>     | 1.572          | 1.363  | ns      | ns       | 0.772           | 0.593   |          |               |         |         |
| 70  | <i>Il33</i>       | 1.566          | 1.111  | ns      | ns       | 1.602           | 1.497   |          |               |         |         |
| 71  | <i>C1qtnf3</i>    | 1.563          | 3.683  | 3.789   | ns       |                 | 3.686   | 3.306    | 0.703         |         |         |
| 72  | <i>Snai1</i>      | 1.559          | 1.491  | ns      | ns       | 0.714           | 0.792   |          |               |         |         |
| 73  | <i>Il4ra</i>      | 1.559          | ns     | ns      | ns       |                 |         |          |               |         |         |
| 74  | <i>Gm6377</i>     | 1.548          | ns     | ns      | ns       |                 | 0.707   |          |               |         |         |
| 75  | <i>Tubb2b</i>     | 1.52           | 1.132  | ns      | ns       | 1.075           | 0.964   |          |               |         |         |
| 76  | <i>Fstl1</i>      | 1.506          | 1.773  | 0.947   | ns       | 0.941           | 1.294   |          |               |         |         |
| 77  | <i>Nox4</i>       | 1.497          | 1.284  | ns      | ns       |                 | 1.222   |          |               |         |         |
| 78  | <i>Lox</i>        | 1.492          | 1.241  | ns      | ns       |                 | 1.171   |          |               |         |         |
| 79  | <i>Fbxo32</i>     | 1.487          | ns     | ns      | ns       |                 |         |          |               |         |         |
| 80  | <i>Tubb6</i>      | 1.483          | 0.67   | ns      | ns       |                 | 0.823   |          | 1.117         |         |         |
| 81  | <i>Mt1</i>        | 1.471          | 0.76   | ns      | ns       | 0.816           |         |          | 0.764         |         |         |
| 82  | <i>Gpx7</i>       | 1.462          | 1.312  | ns      | ns       |                 | 0.955   |          |               |         |         |
| 83  | <i>Bcat1</i>      | 1.451          | 1.199  | ns      | ns       |                 |         |          |               |         |         |
| 84  | <i>Scn7a</i>      | 1.437          | 0.786  | ns      | ns       |                 |         |          |               |         |         |
| 85  | <i>Tnfrsf12a</i>  | 1.435          | ns     | ns      | ns       | 0.987           | 0.892   |          |               |         |         |
| 86  | <i>Ccl12</i>      | 1.435          | ns     | ns      | ns       |                 |         |          |               |         |         |
| 87  | <i>Tnn</i>        | 1.429          | 2.076  | 1.666   | 1.595    | 1.973           | 1.926   |          |               |         |         |
| 88  | <i>P2ry6</i>      | 1.408          | ns     | ns      | ns       |                 |         |          |               |         |         |
| 89  | <i>Mmp19</i>      | 1.407          | 1.215  | ns      | ns       | 1.606           | 1.644   |          |               |         |         |
| 90  | <i>Gm765</i>      | 1.407          | ns     | ns      | ns       |                 |         |          |               |         |         |
| 91  | <i>Eln</i>        | 1.406          | 1.648  | ns      | ns       |                 | 0.626   |          |               |         |         |
| 92  | <i>Ier5l</i>      | 1.405          | ns     | ns      | ns       | 0.684           | 0.667   |          |               |         |         |
| 93  | <i>Vcan</i>       | 1.402          | 1.655  | 1.42    | ns       |                 | 1.078   |          |               |         |         |
| 94  | <i>Col14a1</i>    | 1.401          | 2.374  | ns      | ns       | 0.973           | 1.512   |          | 1.061         |         |         |
| 95  | <i>Kcnj15</i>     | 1.388          | 2.623  | ns      | ns       | 2.616           | 3.274   |          |               |         |         |
| 96  | <i>Lgmn</i>       | 1.387          | ns     | ns      | ns       |                 |         |          |               |         |         |
| 97  | <i>Stab1</i>      | 1.385          | 0.908  | ns      | ns       |                 |         |          |               |         |         |
| 98  | <i>Arsi</i>       | 1.384          | 1.907  | ns      | ns       | 0.881           | 0.989   |          |               |         |         |
| 99  | <i>Anpep</i>      | 1.356          | 1.66   | 1.16    | ns       |                 | 0.819   |          |               |         |         |
| 100 | <i>Mfap5</i>      | 1.355          | 1.881  | ns      | ns       |                 | 1.308   |          |               |         |         |
| 101 | <i>Ddah1</i>      | 1.349          | 1.977  | ns      | ns       | 1.312           | 1.327   |          | 1.504         | 0.840   |         |
| 102 | <i>Csgalnact1</i> | 1.344          | 1.081  | 1.306   | ns       | 1.230           | 1.007   |          |               |         |         |
| 103 | <i>Col5a1</i>     | 1.335          | 1.927  | 1.279   | 1.118    | 0.748           | 0.986   |          | 0.676         |         |         |
| 104 | <i>Tm4sf1</i>     | 1.329          | 1.193  | ns      | ns       | 0.984           | 1.132   | 0.776    | 2.062         | 2.419   |         |
| 105 | <i>Loxl1</i>      | 1.308          | 1.262  | ns      | ns       | 0.788           | 1.104   |          |               |         |         |
| 106 | <i>Ccbe1</i>      | 1.308          | 1.345  | ns      | ns       |                 | 0.784   |          |               |         |         |
| 107 | <i>Fzd2</i>       | 1.297          | ns     | ns      | ns       | 0.833           | 0.591   |          |               |         |         |
| 108 | <i>Socs3</i>      | 1.287          | 0.837  | ns      | ns       | 0.939           | 1.057   |          | 1.205         | 1.496   |         |
| 109 | <i>Il13ra1</i>    | 1.286          | 0.762  | ns      | ns       | 1.200           | 1.166   |          | 2.079         | 1.105   |         |
| 110 | <i>Clec4n</i>     | 1.283          | 0.765  | ns      | 1.214    |                 | 0.892   |          |               |         |         |
| 111 | <i>Scx</i>        | 1.279          | 1.535  | ns      | ns       |                 | 0.771   |          |               |         |         |
| 112 | <i>Slc39a14</i>   | 1.276          | 0.992  | ns      | ns       | 1.085           | 1.165   |          | 1.497         |         |         |
| 113 | <i>Loxl3</i>      | 1.276          | 1.349  | ns      | ns       | 0.870           | 1.007   |          | 1.376         | 1.095   |         |
| 114 | <i>Vim</i>        | 1.264          | 0.89   | 1.065   | ns       |                 |         |          |               |         |         |
| 115 | <i>Slc1a4</i>     | 1.258          | 2.025  | ns      | ns       | 0.991           | 0.944   | 0.893    | 0.714         |         |         |
| 116 | <i>AF251705</i>   | 1.248          | ns     | ns      | ns       |                 |         |          |               |         |         |
| 117 | <i>Ccdc109b</i>   | 1.246          | 0.618  | 0.732   | ns       |                 |         |          | 1.315         |         |         |
| 118 | <i>A4galt</i>     | 1.245          | 1.431  | ns      | ns       | 0.760           | 0.897   |          |               |         |         |
| 119 | <i>Slc27a3</i>    | 1.24           | 1.699  | ns      | ns       | 0.908           | 0.653   |          |               |         |         |
| 120 | <i>Map6</i>       | 1.238          | ns     | ns      | ns       |                 |         |          |               |         |         |

| No. | Gene Name            | TC-whole joint |        |         |          | DMM-whole joint |         |          | DMM-cartilage |         |         |
|-----|----------------------|----------------|--------|---------|----------|-----------------|---------|----------|---------------|---------|---------|
|     |                      | 1 Day          | 1 Week | 6 Weeks | 12 Weeks | 2 Weeks         | 4 Weeks | 16 Weeks | 1 Week        | 2 Weeks | 6 Weeks |
| 121 | <i>Tnfrsf23</i>      | 1.227          | 1.037  | ns      | ns       |                 |         |          |               |         |         |
| 122 | <i>Trim63</i>        | 1.223          | -0.616 | ns      | ns       |                 |         |          |               |         |         |
| 123 | <i>5430435G22Rik</i> | 1.222          | ns     | ns      | ns       |                 |         |          |               |         |         |
| 124 | <i>S100a4</i>        | 1.215          | 0.655  | ns      | 1.145    |                 |         |          |               |         |         |
| 125 | <i>Adamtsl3</i>      | 1.212          | ns     | ns      | ns       |                 |         |          |               |         |         |
| 126 | <i>Dab2</i>          | 1.21           | 1.368  | 1.271   | ns       | 0.829           | 1.222   |          |               |         |         |
| 127 | <i>Asap3</i>         | 1.208          | ns     | ns      | ns       |                 |         |          |               |         |         |
| 128 | <i>Pxdn</i>          | 1.206          | 1.627  | ns      | ns       | 1.053           | 1.268   |          | 1.131         |         |         |
| 129 | <i>Itga7</i>         | 1.205          | ns     | ns      | ns       |                 |         |          |               |         |         |
| 130 | <i>Thbs2</i>         | 1.204          | 1.893  | 1.006   | ns       | 1.505           | 1.427   |          |               |         |         |
| 131 | <i>Sorcs2</i>        | 1.202          | 1.212  | ns      | ns       |                 |         |          |               |         |         |
| 132 | <i>Col18a1</i>       | 1.197          | 1.696  | ns      | ns       | 0.870           | 0.963   |          |               |         |         |
| 133 | <i>Tacc2</i>         | 1.197          | ns     | ns      | ns       |                 |         |          |               |         |         |
| 134 | <i>Sulf1</i>         | 1.194          | 1.561  | 1.051   | ns       | 1.122           | 1.369   | 1.575    | 1.562         | 1.026   |         |
| 135 | <i>Hspb7</i>         | 1.193          | -0.97  | ns      | ns       |                 |         |          |               |         |         |
| 136 | <i>Angptl1</i>       | 1.19           | 2.48   | 1.591   | ns       | 1.512           | 2.180   |          |               |         |         |
| 137 | <i>Junb</i>          | 1.178          | ns     | ns      | ns       |                 | 0.684   |          |               |         |         |
| 138 | <i>Tgfb1</i>         | 1.169          | 0.866  | ns      | 1.146    | 0.689           |         | 2.237    | 3.077         |         |         |
| 139 | <i>Col6a3</i>        | 1.165          | 2.133  | 1.652   | 1.256    | 0.876           | 1.349   | 1.115    | 2.518         | 1.633   |         |
| 140 | <i>Bex1</i>          | 1.156          | ns     | ns      | ns       |                 |         |          |               |         |         |
| 141 | <i>Aspn</i>          | 1.156          | 2.012  | 1.904   | ns       | 1.315           | 1.350   |          |               |         |         |
| 142 | <i>Prpf2</i>         | 1.155          | 1.004  | ns      | ns       | 0.696           | 0.873   |          |               | 0.709   |         |
| 143 | <i>Srpx2</i>         | 1.145          | 1.555  | 1.337   | 1.312    | 1.038           | 1.091   |          | 1.472         | 0.850   |         |
| 144 | <i>Arl4c</i>         | 1.141          | 0.652  | ns      | ns       |                 | 0.622   |          |               |         |         |
| 145 | <i>nsg1</i>          | 1.141          | 0.875  | ns      | ns       | 0.766           | 0.799   |          |               |         |         |
| 146 | <i>Enpp1</i>         | 1.14           | 1.698  | 1.629   | ns       | 1.231           | 0.963   |          |               |         |         |
| 147 | <i>Prkcdp</i>        | 1.13           | 1.025  | ns      | 1.683    | 0.736           | 0.748   |          |               |         |         |
| 148 | <i>Itga5</i>         | 1.129          | 0.912  | ns      | 1.124    |                 |         |          |               |         |         |
| 149 | <i>Il1rl1</i>        | 1.129          | ns     | ns      | ns       | 1.548           |         |          |               |         |         |
| 150 | <i>Lmna</i>          | 1.121          | 0.743  | ns      | ns       | 0.773           | 0.598   |          |               |         |         |
| 151 | <i>Lrrn1</i>         | 1.12           | ns     | ns      | ns       |                 |         |          |               |         |         |
| 152 | <i>Cfb</i>           | 1.111          | 1.013  | ns      | 1.088    |                 |         |          |               |         |         |
| 153 | <i>Il1r1</i>         | 1.109          | 0.733  | ns      | ns       |                 | 0.670   |          |               |         |         |
| 154 | <i>Osr1</i>          | 1.106          | 0.991  | ns      | ns       |                 | 0.895   |          |               |         |         |
| 155 | <i>Fcgr1</i>         | 1.105          | ns     | ns      | ns       |                 |         |          |               |         |         |
| 156 | <i>Layn</i>          | 1.103          | 0.803  | 1.238   | ns       | 0.627           |         |          |               |         |         |
| 157 | <i>Plat</i>          | 1.092          | 1.039  | 1.101   | ns       |                 | 0.915   |          | 1.733         |         |         |
| 158 | <i>Fkbp11</i>        | 1.092          | 1.095  | ns      | ns       |                 |         |          |               |         |         |
| 159 | <i>Aldh1l2</i>       | 1.09           | 0.781  | ns      | ns       |                 | 0.912   |          | 1.243         |         |         |
| 160 | <i>Ctss</i>          | 1.084          | ns     | ns      | ns       |                 |         |          |               |         |         |
| 161 | <i>Mfap4</i>         | 1.083          | 1.861  | ns      | ns       |                 | 1.367   |          |               |         |         |
| 162 | <i>Apoc2</i>         | 1.08           | ns     | ns      | ns       |                 |         |          |               |         |         |
| 163 | <i>Hs6st2</i>        | 1.08           | ns     | ns      | -1.152   |                 |         |          |               |         |         |
| 164 | <i>Myof</i>          | 1.077          | 1.296  | 1.06    | ns       | 0.691           | 0.667   |          |               |         |         |
| 165 | <i>Klh38</i>         | 1.076          | ns     | ns      | ns       |                 |         |          |               |         |         |
| 166 | <i>Thy1</i>          | 1.076          | 1.321  | 1.121   | 1.335    | 1.173           | 1.343   |          |               |         |         |
| 167 | <i>Thbs4</i>         | 1.074          | 1.174  | ns      | ns       | 0.957           | 1.153   | 1.122    |               |         |         |
| 168 | <i>Col6a2</i>        | 1.071          | 2.108  | 1.266   | 1.489    | 1.074           | 1.617   |          | 1.567         | 1.465   |         |
| 169 | <i>Fndc1</i>         | 1.067          | 2.223  | 1.297   | ns       | 1.437           | 1.597   | 1.385    |               |         |         |
| 170 | <i>Fscn1</i>         | 1.064          | 0.982  | ns      | ns       |                 | 1.205   |          |               |         |         |
| 171 | <i>Nol3</i>          | 1.061          | ns     | ns      | ns       |                 |         |          |               |         |         |
| 172 | <i>Cd14</i>          | 1.058          | 0.74   | ns      | ns       |                 |         |          | 1.904         | 2.228   |         |
| 173 | <i>Pdia4</i>         | 1.058          | ns     | ns      | ns       |                 |         |          |               |         |         |
| 174 | <i>Cxcl14</i>        | 1.057          | ns     | ns      | 1.255    |                 | 0.998   |          |               |         |         |
| 175 | <i>Cnksr1</i>        | 1.056          | -0.722 | ns      | ns       |                 |         |          |               |         |         |
| 176 | <i>Lamb1</i>         | 1.056          | 1.354  | ns      | ns       | 1.141           | 1.623   |          |               |         |         |
| 177 | <i>Medag</i>         | 1.053          | 1.907  | 1.091   | ns       |                 |         |          |               |         |         |
| 178 | <i>Col6a1</i>        | 1.05           | 2.06   | 1.196   | 1.284    | 1.157           | 1.520   | 1.322    | 1.503         | 0.795   |         |
| 179 | <i>Ppp1r27</i>       | 1.048          | -1.04  | ns      | ns       |                 |         |          |               |         |         |
| 180 | <i>Nnmt</i>          | 1.048          | 0.744  | ns      | ns       |                 | 0.761   |          |               |         |         |
| 181 | <i>Efemp2</i>        | 1.044          | 1.054  | ns      | ns       | 0.639           | 0.905   |          |               |         |         |
| 182 | <i>Prg4</i>          | 1.044          | 1.46   | 3.006   | ns       |                 |         |          |               |         |         |
| 183 | <i>Nfatc4</i>        | 1.044          | 1.484  | ns      | ns       | 1.068           | 1.143   |          |               |         |         |
| 184 | <i>Col5a3</i>        | 1.043          | 1.457  | 1.122   | ns       | 1.029           | 1.397   |          |               |         |         |

| No. | Gene Name            | TC-whole joint |        |         |          | DMM-whole joint |         |          | DMM-cartilage |         |         |
|-----|----------------------|----------------|--------|---------|----------|-----------------|---------|----------|---------------|---------|---------|
|     |                      | 1 Day          | 1 Week | 6 Weeks | 12 Weeks | 2 Weeks         | 4 Weeks | 16 Weeks | 1 Week        | 2 Weeks | 6 Weeks |
| 185 | <i>Cx3cr1</i>        | 1.039          | ns     | ns      | ns       |                 |         |          |               |         |         |
| 186 | <i>Nek6</i>          | 1.039          | ns     | ns      | ns       |                 |         |          |               |         |         |
| 187 | <i>Col5a2</i>        | 1.038          | 1.53   | 1.435   | 1.408    |                 | 1.102   | 0.917    |               | 0.697   |         |
| 188 | <i>Igsf10</i>        | 1.037          | 1.848  | ns      | ns       |                 |         |          |               |         |         |
| 189 | <i>Adh1*</i>         | 1.033          | ns     | ns      | ns       |                 | -0.718  |          |               |         |         |
| 190 | <i>Hif1a</i>         | 1.028          | 0.976  | ns      | ns       | 0.884           | 1.139   |          | 1.920         | 1.194   |         |
| 191 | <i>Wfdc17</i>        | 1.024          | ns     | ns      | ns       |                 |         |          |               |         |         |
| 192 | <i>Adam12</i>        | 1.023          | 1.141  | ns      | ns       |                 | 0.640   |          |               |         |         |
| 193 | <i>Pdia5</i>         | 1.022          | 0.921  | ns      | ns       |                 |         |          |               |         |         |
| 194 | <i>2810433D01Rik</i> | 1.022          | ns     | ns      | ns       | 0.606           |         |          |               |         |         |
| 195 | <i>Gpr153</i>        | 1.019          | 1.216  | ns      | ns       |                 | 1.166   |          |               |         |         |
| 196 | <i>Emp1</i>          | 1.017          | 1.212  | 0.903   | ns       | 0.630           | 0.773   |          | 2.545         | 3.440   | 2.337   |
| 197 | <i>Bok</i>           | 1.015          | ns     | ns      | ns       |                 |         |          |               |         |         |
| 198 | <i>Osmr</i>          | 1.013          | 0.818  | 0.926   | ns       | 0.853           | 1.080   |          | 1.186         |         |         |
| 199 | <i>Mss51</i>         | 1.012          | ns     | ns      | ns       |                 |         |          |               |         |         |
| 200 | <i>Art5</i>          | 1.01           | ns     | ns      | ns       |                 |         |          |               |         |         |
| 201 | <i>Atp8b1</i>        | 1.006          | 0.901  | ns      | ns       |                 | 1.102   |          |               |         |         |
| 202 | <i>Ildr2</i>         | 0.997          | ns     | ns      | ns       |                 |         |          |               |         |         |
| 203 | <i>Ablim2</i>        | 0.996          | ns     | ns      | ns       |                 |         |          |               |         |         |
| 204 | <i>Lgals1</i>        | 0.992          | 0.758  | ns      | ns       |                 |         |          |               |         |         |
| 205 | <i>Ifi205</i>        | 0.991          | ns     | ns      | ns       |                 |         |          |               |         |         |
| 206 | <i>Socs1</i>         | 0.99           | ns     | ns      | ns       |                 |         |          |               |         |         |
| 207 | <i>Ptgfrn</i>        | 0.986          | 1.437  | ns      | ns       | 0.990           | 1.389   |          |               | 1.433   |         |
| 208 | <i>Cysltr1</i>       | 0.984          | ns     | ns      | ns       |                 |         |          |               |         |         |
| 209 | <i>Fzd1</i>          | 0.978          | 0.786  | ns      | ns       | 0.921           | 1.234   |          |               |         |         |
| 210 | <i>Slc41a2</i>       | 0.978          | 1.143  | ns      | ns       | 0.829           | 1.097   |          |               | 1.100   |         |
| 211 | <i>Numb1</i>         | 0.977          | ns     | ns      | ns       |                 |         |          |               |         |         |
| 212 | <i>Akap5</i>         | 0.97           | ns     | ns      | ns       |                 |         |          |               |         |         |
| 213 | <i>Cbr2</i>          | 0.97           | ns     | ns      | ns       |                 |         |          |               |         |         |
| 214 | <i>Apoe</i>          | 0.963          | ns     | ns      | ns       |                 |         |          |               |         |         |
| 215 | <i>Plau</i>          | 0.963          | ns     | ns      | ns       |                 |         |          |               |         |         |
| 216 | <i>B3galnt1</i>      | 0.95           | 0.95   | ns      | ns       | 0.730           |         |          |               |         |         |
| 217 | <i>Igf1</i>          | 0.946          | 1.636  | 1.135   | ns       | 0.991           | 1.078   |          |               | 1.223   |         |
| 218 | <i>Cttnbp2nl</i>     | 0.945          | ns     | ns      | ns       |                 | 0.682   |          |               |         |         |
| 219 | <i>Phldb2</i>        | 0.942          | ns     | ns      | ns       |                 | 0.808   |          |               |         |         |
| 220 | <i>Rian</i>          | 0.942          | 2.002  | ns      | ns       | 1.294           | 1.103   |          |               |         |         |
| 221 | <i>Aebp1</i>         | 0.939          | 1.41   | ns      | ns       | 0.999           | 1.331   |          | 1.496         |         |         |
| 222 | <i>AU023762</i>      | 0.938          | ns     | ns      | ns       |                 |         |          |               |         |         |
| 223 | <i>Sulf2</i>         | 0.937          | 1.71   | 1.082   | ns       | 0.877           | 0.948   |          |               |         |         |
| 224 | <i>Podn</i>          | 0.937          | 0.743  | ns      | ns       |                 |         |          |               |         |         |
| 225 | <i>Serpinh1</i>      | 0.937          | 0.834  | ns      | 1.64     |                 | 1.043   |          |               |         |         |
| 226 | <i>Cdc42ep5</i>      | 0.936          | ns     | ns      | ns       |                 |         |          |               |         |         |
| 227 | <i>Mecom</i>         | 0.933          | ns     | ns      | ns       | 0.951           | 0.919   |          |               |         |         |
| 228 | <i>Morc4</i>         | 0.933          | 1.132  | ns      | ns       | 0.882           | 1.076   |          |               |         |         |
| 229 | <i>Lpxn</i>          | 0.929          | ns     | ns      | ns       |                 |         |          |               |         |         |
| 230 | <i>Pdk4</i>          | 0.929          | ns     | ns      | ns       |                 |         |          |               |         |         |
| 231 | <i>Tmem198b</i>      | 0.924          | 0.78   | ns      | ns       |                 | 0.702   |          |               |         |         |
| 232 | <i>Mest</i>          | 0.924          | 2.6    | ns      | ns       | 0.988           | 0.843   |          | 2.256         |         |         |
| 233 | <i>B4galt2</i>       | 0.923          | 0.928  | ns      | ns       |                 |         |          |               |         |         |
| 234 | <i>H2-Eb1</i>        | 0.922          | ns     | ns      | 1.269    |                 |         |          |               |         |         |
| 235 | <i>Inhba</i>         | 0.922          | 0.857  | 1.451   | ns       |                 | 0.768   |          | 3.426         | 3.743   | 2.329   |
| 236 | <i>C1qb</i>          | 0.921          | ns     | ns      | ns       |                 |         |          |               |         |         |
| 237 | <i>Fam129b</i>       | 0.916          | 0.644  | ns      | 1.177    | 0.630           |         |          |               |         |         |
| 238 | <i>Adamts12</i>      | 0.915          | 1.638  | ns      | ns       |                 | 1.353   |          |               | 0.603   |         |
| 239 | <i>Ccdc102a</i>      | 0.915          | 1.086  | ns      | ns       | 0.966           | 0.697   |          |               |         |         |
| 240 | <i>Dbn1</i>          | 0.914          | 1.295  | ns      | ns       |                 |         |          |               |         |         |
| 241 | <i>Gpmb</i>          | 0.914          | 0.865  | ns      | ns       |                 |         |          |               |         |         |
| 242 | <i>Tmem106a</i>      | 0.911          | ns     | ns      | ns       |                 |         |          |               |         |         |
| 243 | <i>Ly6a</i>          | 0.909          | 0.903  | ns      | ns       |                 | 0.834   |          |               |         |         |
| 244 | <i>Bend6</i>         | 0.909          | 0.598  | ns      | ns       | 0.948           | 0.634   |          |               |         |         |
| 245 | <i>Gatsl2</i>        | 0.903          | ns     | ns      | ns       |                 | 0.599   |          |               |         |         |
| 246 | <i>Gm13889</i>       | 0.901          | ns     | ns      | ns       |                 |         |          |               |         |         |
| 247 | <i>Svep1</i>         | 0.9            | 1.248  | ns      | ns       | 0.734           | 0.873   |          |               |         |         |
| 248 | <i>Epb4.113</i>      | 0.897          | 1.05   | ns      | ns       | 0.755           |         |          |               |         |         |

| No. | Gene Name       | TC-whole joint |        |         |          | DMM-whole joint |          |          | DMM-cartilage |         |         |
|-----|-----------------|----------------|--------|---------|----------|-----------------|----------|----------|---------------|---------|---------|
|     |                 | 1 Day          | 1 Week | 6 Weeks | 12 Weeks | 2 Weeks         | 4 Weeks  | 16 Weeks | 1 Week        | 2 Weeks | 6 Weeks |
| 249 | <i>Nrn1</i>     | 0.893          | 1.525  | ns      | ns       | 0.804           |          |          | 1.509         |         |         |
| 250 | <i>Pmepa1</i>   | 0.892          | 1.1    | ns      | ns       | 0.742           | 1.078    |          |               |         |         |
| 251 | <i>Cd248</i>    | 0.884          | 1.61   | ns      | ns       |                 | 0.707    |          |               |         |         |
| 252 | <i>Mmp23</i>    | 0.883          | 1.131  | ns      | ns       |                 | 0.678    |          |               |         |         |
| 253 | <i>Sh3rf2</i>   | 0.876          | ns     | ns      | ns       |                 |          |          |               |         |         |
| 254 | <i>Hspb1</i>    | 0.876          | ns     | -1.162  | ns       |                 |          |          |               |         |         |
| 255 | <i>Adam9</i>    | 0.873          | ns     | ns      | ns       | 0.808           | 0.801    |          |               |         |         |
| 256 | <i>Dse</i>      | 0.872          | 0.621  | ns      | ns       | 0.834           | 0.800    |          |               |         |         |
| 257 | <i>Tmem37</i>   | 0.872          | ns     | ns      | 1.252    |                 |          |          |               |         |         |
| 258 | <i>Col8a1</i>   | 0.871          | 1.106  | 0.772   | ns       | 0.793           | 0.767    |          |               |         |         |
| 259 | <i>Calu</i>     | 0.869          | 0.877  | ns      | ns       |                 | 0.857    |          | 1.618         | 2.698   | 2.642   |
| 260 | <i>Pltp</i>     | 0.868          | ns     | ns      | ns       |                 | 0.655    |          |               |         |         |
| 261 | <i>Ppap2c</i>   | 0.867          | ns     | ns      | ns       |                 |          |          |               |         |         |
| 262 | <i>Myh1</i>     | 0.864          | ns     | ns      | ns       |                 |          |          |               |         |         |
| 263 | <i>Ndn</i>      | 0.863          | 1.05   | ns      | ns       |                 |          |          |               |         |         |
| 264 | <i>Ahr</i>      | 0.859          | ns     | ns      | ns       | 0.758           | 0.688    |          |               |         |         |
| 265 | <i>Basp1</i>    | 0.856          | ns     | ns      | ns       |                 |          |          |               |         |         |
| 266 | <i>Ttc9</i>     | 0.856          | ns     | ns      | ns       |                 |          |          |               |         |         |
| 267 | <i>Rab23</i>    | 0.855          | 0.689  | ns      | ns       |                 | 0.666    |          |               |         |         |
| 268 | <i>Rasgef1b</i> | 0.855          | ns     | ns      | ns       |                 |          |          |               |         |         |
| 269 | <i>Ier3</i>     | 0.854          | 0.63   | ns      | ns       |                 | 0.662    |          |               | 2.552   |         |
| 270 | <i>Amotl2</i>   | 0.852          | 0.674  | ns      | ns       |                 |          |          | 1.830         | 1.579   |         |
| 271 | <i>Lrrc15</i>   | 0.852          | 1.961  | ns      | ns       | 1.871           | 2.022    | 2.389    |               |         |         |
| 272 | <i>Cryab</i>    | 0.851          | -0.635 | ns      | ns       |                 |          |          |               |         |         |
| 273 | <i>Tlr1</i>     | 0.85           | ns     | ns      | ns       |                 |          |          |               |         |         |
| 274 | <i>Mnda</i>     | 0.849          | ns     | 1.307   | ns       |                 |          |          |               |         |         |
| 275 | <i>Pvr</i>      | 0.849          | 0.666  | ns      | ns       |                 | 0.949    |          | 1.053         | 0.773   |         |
| 276 | <i>Plod1</i>    | 0.849          | 0.728  | ns      | ns       | 0.623           | 0.714    |          |               |         |         |
| 277 | <i>Gpr34</i>    | 0.848          | ns     | ns      | ns       |                 |          |          |               |         |         |
| 278 | <i>Abcc3</i>    | 0.847          | ns     | ns      | ns       |                 |          |          |               |         |         |
| 279 | <i>Thbs3</i>    | 0.847          | 1.981  | 2.037   | 1.32     | 1.023           | 1.437    | 1.362    |               | 1.108   |         |
| 280 | <i>Fgf7</i>     | 0.847          | ns     | ns      | ns       |                 | 0.808553 |          |               |         |         |
| 281 | <i>Fgf2</i>     | 0.845          | ns     | ns      | ns       |                 |          |          |               |         |         |
| 282 | <i>Tbx18</i>    | 0.845          | 1.208  | ns      | ns       | 0.985           | 1.081    |          |               |         |         |
| 283 | <i>Grb10</i>    | 0.844          | 1.259  | ns      | ns       | 0.830           | 1.229    |          |               |         |         |
| 284 | <i>Pex13</i>    | 0.834          | ns     | ns      | ns       |                 |          |          |               |         |         |
| 285 | <i>Smpdl3b</i>  | 0.833          | ns     | ns      | ns       |                 |          |          |               |         |         |
| 286 | <i>Ctsc</i>     | 0.832          | ns     | ns      | ns       |                 | 1.472    |          |               |         |         |
| 287 | <i>Pdlim4</i>   | 0.832          | 0.788  | ns      | ns       | 0.841           | 0.871    |          |               | 1.297   |         |
| 288 | <i>Fcgr2b</i>   | 0.83           | ns     | 0.991   | ns       |                 |          |          |               |         |         |
| 289 | <i>Abcb1b</i>   | 0.827          | ns     | ns      | ns       |                 |          |          |               |         |         |
| 290 | <i>Fads3</i>    | 0.825          | ns     | ns      | 0.8      |                 |          |          |               |         |         |
| 291 | <i>Ms4a6b</i>   | 0.825          | ns     | ns      | ns       |                 |          |          |               |         |         |
| 292 | <i>Fos</i>      | 0.825          | 0.735  | ns      | ns       |                 | 1.268    |          | 3.321         | 4.118   |         |
| 293 | <i>Flnc</i>     | 0.822          | -0.67  | ns      | ns       |                 |          |          |               |         |         |
| 294 | <i>Bgn</i>      | 0.821          | 1.421  | 1.433   | ns       | 0.851           | 1.603    |          |               | 0.945   |         |
| 295 | <i>Fam171a2</i> | 0.821          | 1.019  | ns      | ns       | 1.124           | 1.071    |          |               |         |         |
| 296 | <i>Ccdc80</i>   | 0.817          | 0.929  | 1.476   | ns       |                 | 0.646    | 0.804    |               |         |         |
| 297 | <i>Adamts1</i>  | 0.816          | ns     | ns      | ns       |                 | 0.857    |          |               |         |         |
| 298 | <i>Nt5dc2</i>   | 0.812          | 0.603  | ns      | ns       |                 | 0.770    |          |               |         |         |
| 299 | <i>Nmrk1</i>    | 0.812          | ns     | ns      | ns       |                 |          |          |               |         |         |
| 300 | <i>Slamf9</i>   | 0.812          | ns     | ns      | ns       |                 |          |          |               |         |         |
| 301 | <i>Atp9a</i>    | 0.812          | ns     | -0.685  | ns       |                 |          |          |               |         |         |
| 302 | <i>P4ha2</i>    | 0.81           | 1.071  | ns      | ns       |                 | 1.172    |          |               |         |         |
| 303 | <i>Emilin1</i>  | 0.808          | 0.807  | ns      | ns       |                 |          |          |               |         |         |
| 304 | <i>Maged1</i>   | 0.807          | 0.862  | ns      | ns       |                 | 0.675    |          |               |         |         |
| 305 | <i>C1qc</i>     | 0.803          | ns     | ns      | 1.345    |                 |          |          |               |         |         |
| 306 | <i>Txndc5</i>   | 0.803          | 0.763  | ns      | ns       |                 |          |          |               | 0.662   |         |
| 307 | <i>Maged2</i>   | 0.802          | 0.955  | ns      | ns       |                 | 0.754    |          |               |         |         |
| 308 | <i>Smoc1</i>    | 0.794          | 1.656  | ns      | ns       | 1.442           | 1.035    |          |               | 1.216   |         |
| 309 | <i>Cyb561</i>   | 0.793          | ns     | ns      | ns       |                 | 0.850    |          |               |         |         |
| 310 | <i>Obsl1</i>    | 0.791          | ns     | ns      | ns       |                 |          |          |               |         |         |
| 311 | <i>Ubt1</i>     | 0.789          | ns     | ns      | ns       |                 |          |          |               |         |         |
| 312 | <i>Tbx1</i>     | 0.789          | ns     | ns      | ns       |                 |          |          |               |         |         |

| No. | Gene Name        | TC-whole joint |        |         |          | DMM-whole joint |         |          | DMM-cartilage |         |         |
|-----|------------------|----------------|--------|---------|----------|-----------------|---------|----------|---------------|---------|---------|
|     |                  | 1 Day          | 1 Week | 6 Weeks | 12 Weeks | 2 Weeks         | 4 Weeks | 16 Weeks | 1 Week        | 2 Weeks | 6 Weeks |
| 313 | <i>Rhoc</i>      | 0.788          | 0.673  | ns      | ns       |                 | 0.722   |          |               |         |         |
| 314 | <i>Lama4</i>     | 0.787          | 1.099  | ns      | ns       | 0.819           | 1.004   |          | 0.602         | 0.781   |         |
| 315 | <i>Igfn1</i>     | 0.786          | ns     | ns      | ns       |                 |         |          |               |         |         |
| 316 | <i>Cdk14</i>     | 0.786          | 0.77   | ns      | ns       |                 | 0.872   |          |               |         |         |
| 317 | <i>C1qtnf2</i>   | 0.786          | 1.441  | ns      | ns       |                 | 1.205   |          |               |         |         |
| 318 | <i>Myh14</i>     | 0.785          | ns     | ns      | ns       |                 |         |          |               |         |         |
| 319 | <i>Plce1</i>     | 0.785          | ns     | ns      | ns       | 0.802           | 0.826   |          |               |         |         |
| 320 | <i>Gpr183</i>    | 0.785          | ns     | ns      | ns       |                 |         |          |               |         |         |
| 321 | <i>Col16a1</i>   | 0.784          | 1.293  | 1.097   | ns       | 0.903           | 1.023   |          |               |         |         |
| 322 | <i>Angptl2</i>   | 0.783          | 1.748  | ns      | ns       | 1.255           | 1.069   | 1.204    |               |         |         |
| 323 | <i>Olfml3</i>    | 0.783          | ns     | ns      | ns       |                 | 0.781   |          |               |         |         |
| 324 | <i>Tmem45a</i>   | 0.78           | 1.498  | ns      | ns       | 0.715           | 0.940   |          |               |         |         |
| 325 | <i>Rgs1</i>      | 0.779          | ns     | ns      | ns       |                 |         |          |               |         |         |
| 326 | <i>Cav1</i>      | 0.779          | ns     | ns      | ns       |                 |         |          |               |         |         |
| 327 | <i>Pid1</i>      | 0.778          | ns     | ns      | ns       |                 |         |          |               |         |         |
| 328 | <i>Chrnbl</i>    | 0.778          | ns     | ns      | ns       |                 |         |          |               |         |         |
| 329 | <i>H2-Ab1</i>    | 0.776          | ns     | ns      | ns       |                 |         |          |               |         |         |
| 330 | <i>Bcl3</i>      | 0.775          | ns     | ns      | ns       |                 | 0.789   |          |               |         |         |
| 331 | <i>Cyb5r3</i>    | 0.774          | 0.669  | ns      | ns       |                 | 1.215   |          |               |         |         |
| 332 | <i>Armcx2</i>    | 0.772          | 0.661  | ns      | ns       |                 | 0.603   |          |               |         |         |
| 333 | <i>Gprc5b</i>    | 0.772          | ns     | ns      | ns       | 0.653           | 0.694   |          |               |         |         |
| 334 | <i>Synj2</i>     | 0.767          | ns     | ns      | ns       |                 |         |          |               |         |         |
| 335 | <i>Chst14</i>    | 0.766          | 0.658  | ns      | ns       |                 |         |          |               |         |         |
| 336 | <i>Tubb2a</i>    | 0.764          | 0.66   | ns      | 0.826    | 0.650           |         |          |               |         |         |
| 337 | <i>C1qa</i>      | 0.764          | ns     | ns      | 0.771    |                 |         |          |               |         |         |
| 338 | <i>Ttc12</i>     | 0.76           | ns     | ns      | ns       |                 |         |          |               |         |         |
| 339 | <i>Nt5e</i>      | 0.76           | 1.06   | 1.029   | ns       | 1.341           | 1.206   | 1.082    | 3.797         | 2.382   | 2.492   |
| 340 | <i>Lmod2</i>     | 0.76           | -0.946 | ns      | ns       |                 |         |          |               |         |         |
| 341 | <i>Ccr2</i>      | 0.76           | ns     | ns      | ns       |                 |         |          |               |         |         |
| 342 | <i>Tnfrsf11a</i> | 0.759          | ns     | ns      | ns       |                 |         |          |               |         |         |
| 343 | <i>Epb4.111</i>  | 0.759          | 0.739  | ns      | ns       |                 |         |          | 1.665         | 1.506   |         |
| 344 | <i>Escr</i>      | 0.757          | ns     | ns      | ns       | 0.816           | 0.913   |          |               |         |         |
| 345 | <i>Igdcc4</i>    | 0.755          | ns     | ns      | ns       | 0.727           | 0.881   |          |               |         |         |
| 346 | <i>Aplnr</i>     | 0.752          | 0.699  | ns      | ns       |                 | 0.932   |          |               |         |         |
| 347 | <i>Prosl</i>     | 0.752          | ns     | ns      | ns       |                 |         |          |               |         |         |
| 348 | <i>Map1b</i>     | 0.751          | ns     | ns      | ns       |                 |         |          |               |         |         |
| 349 | <i>Frk</i>       | 0.749          | 0.796  | ns      | ns       |                 | 0.977   |          |               |         |         |
| 350 | <i>P4hb</i>      | 0.748          | ns     | ns      | ns       |                 |         |          |               |         |         |
| 351 | <i>Mxra7</i>     | 0.747          | 0.904  | ns      | ns       | 0.878           | 1.350   |          |               |         |         |
| 352 | <i>Dsel</i>      | 0.746          | 1.402  | ns      | ns       | 1.046           | 1.228   |          |               |         |         |
| 353 | <i>Lyplal1</i>   | 0.743          | ns     | ns      | ns       |                 |         |          |               |         |         |
| 354 | <i>Itgb5</i>     | 0.742          | ns     | ns      | ns       |                 | 0.596   |          |               |         |         |
| 355 | <i>Ankrd29</i>   | 0.742          | 1.046  | ns      | ns       |                 | 0.836   |          |               |         |         |
| 356 | <i>Chpf</i>      | 0.741          | 1.356  | ns      | ns       |                 |         |          |               |         |         |
| 357 | <i>Fabp5</i>     | 0.74           | ns     | ns      | ns       |                 |         |          |               |         |         |
| 358 | <i>Aif1</i>      | 0.735          | ns     | ns      | ns       |                 |         |          |               |         |         |
| 359 | <i>Bicc1</i>     | 0.735          | 0.908  | ns      | ns       | 0.715           | 0.984   |          |               |         |         |
| 360 | <i>Tpbp</i>      | 0.733          | ns     | ns      | ns       |                 |         |          |               |         |         |
| 361 | <i>Atf3</i>      | 0.731          | ns     | ns      | ns       |                 |         |          |               |         |         |
| 362 | <i>H2-Aa</i>     | 0.73           | ns     | ns      | 0.9      |                 |         |          |               |         |         |
| 363 | <i>Ptn</i>       | 0.729          | 1.634  | ns      | ns       | 1.188           | 1.177   |          |               |         |         |
| 364 | <i>Zfp503</i>    | 0.728          | ns     | ns      | ns       |                 |         |          |               |         |         |
| 365 | <i>Fkbp10</i>    | 0.727          | 1.014  | ns      | ns       |                 | 0.887   |          |               |         |         |
| 366 | <i>Tmtc4</i>     | 0.727          | ns     | ns      | ns       |                 |         |          |               |         |         |
| 367 | <i>Kdelr2</i>    | 0.727          | ns     | ns      | ns       |                 |         |          |               |         |         |
| 368 | <i>Erf</i>       | 0.726          | ns     | ns      | ns       |                 |         |          |               |         |         |
| 369 | <i>Slfn9</i>     | 0.725          | ns     | ns      | ns       |                 |         |          |               |         |         |
| 370 | <i>Eps8</i>      | 0.725          | ns     | ns      | ns       | 0.673           | 0.593   |          |               |         |         |
| 371 | <i>Gadd45g</i>   | 0.724          | ns     | ns      | ns       |                 |         |          |               |         |         |
| 372 | <i>Folr2</i>     | 0.724          | 0.707  | ns      | ns       |                 |         |          | 2.485         | 2.791   |         |
| 373 | <i>Zfp449</i>    | 0.724          | ns     | ns      | ns       |                 | 1.140   |          |               |         |         |
| 374 | <i>Sigmar1</i>   | 0.723          | ns     | ns      | ns       |                 |         |          |               |         |         |
| 375 | <i>Cttn</i>      | 0.721          | 0.643  | ns      | ns       |                 |         |          |               |         |         |
| 376 | <i>Tspan4</i>    | 0.718          | ns     | ns      | ns       |                 |         |          |               |         |         |

| No. | Gene Name            | TC-whole joint |        |         |          | DMM-whole joint |         |          | DMM-cartilage |         |         |
|-----|----------------------|----------------|--------|---------|----------|-----------------|---------|----------|---------------|---------|---------|
|     |                      | 1 Day          | 1 Week | 6 Weeks | 12 Weeks | 2 Weeks         | 4 Weeks | 16 Weeks | 1 Week        | 2 Weeks | 6 Weeks |
| 377 | <i>Pdlim3</i>        | 0.716          | ns     | ns      | ns       |                 |         |          |               |         |         |
| 378 | <i>Cul7</i>          | 0.716          | 0.823  | ns      | ns       |                 |         |          |               |         |         |
| 379 | <i>Rcn1</i>          | 0.716          | 0.687  | ns      | ns       | 1.036           | 0.773   |          |               |         |         |
| 380 | <i>Lgi2</i>          | 0.716          | ns     | ns      | ns       |                 |         |          |               |         |         |
| 381 | <i>Igfbp7</i>        | 0.715          | 0.908  | ns      | ns       |                 |         |          | 0.913         |         |         |
| 382 | <i>Ndrp4</i>         | 0.713          | 1.419  | ns      | ns       | 1.009           | 1.208   |          | 1.369         |         |         |
| 383 | <i>Meox2</i>         | 0.713          | 0.779  | ns      | ns       | 0.788           | 1.043   |          |               |         |         |
| 384 | <i>Sertad4</i>       | 0.711          | 1.563  | 0.962   | ns       | 1.031           | 1.367   | 1.139    |               |         |         |
| 385 | <i>Trabd2b</i>       | 0.71           | ns     | ns      | ns       |                 |         |          |               |         |         |
| 386 | <i>Plod3</i>         | 0.71           | ns     | ns      | ns       |                 |         |          |               |         |         |
| 387 | <i>Ebpl</i>          | 0.709          | ns     | ns      | ns       |                 |         |          |               |         |         |
| 388 | <i>Dpysl3</i>        | 0.709          | 0.706  | 0.709   | ns       | 0.760           | 1.000   |          | 2.294         | 1.227   |         |
| 389 | <i>Pcolce</i>        | 0.709          | 1.094  | ns      | 0.906    |                 | 1.182   |          |               |         |         |
| 390 | <i>Lrp1</i>          | 0.709          | 0.888  | ns      | ns       |                 | 0.871   |          |               |         |         |
| 391 | <i>Casp12</i>        | 0.709          | ns     | ns      | ns       | 0.706           | 0.807   |          |               |         |         |
| 392 | <i>Slc2a1</i>        | 0.707          | ns     | ns      | ns       |                 |         |          |               |         |         |
| 393 | <i>Myod1</i>         | 0.707          | ns     | ns      | ns       |                 |         |          |               |         |         |
| 394 | <i>Serpinb8</i>      | 0.706          | 1.043  | ns      | ns       |                 | 0.820   |          | 0.761         |         |         |
| 395 | <i>Kcnc4</i>         | 0.702          | ns     | ns      | ns       |                 |         |          |               |         |         |
| 396 | <i>Cnn3</i>          | 0.702          | 0.737  | ns      | ns       | 0.804           | 0.868   |          |               |         |         |
| 397 | <i>Gulp1</i>         | 0.701          | 0.91   | ns      | ns       | 0.899           | 1.156   |          |               |         |         |
| 398 | <i>Lrrc2</i>         | 0.7            | -0.772 | ns      | ns       |                 |         |          |               |         |         |
| 399 | <i>Plxnb2</i>        | 0.698          | ns     | ns      | ns       |                 |         |          |               |         |         |
| 400 | <i>Phf11d</i>        | 0.698          | ns     | 1.112   | ns       |                 |         |          |               |         |         |
| 401 | <i>Anxa2</i>         | 0.697          | ns     | ns      | 1.016    |                 |         |          |               |         |         |
| 402 | <i>Stmn2</i>         | 0.697          | ns     | ns      | ns       | 0.972           | 0.824   |          |               |         |         |
| 403 | <i>Kctd17</i>        | 0.695          | 0.743  | ns      | 0.936    |                 | 0.790   |          |               |         |         |
| 404 | <i>Tmem97</i>        | 0.695          | ns     | ns      | 1.509    |                 |         |          |               |         |         |
| 405 | <i>Dpt</i>           | 0.695          | 1.856  | 1.339   | ns       | 0.985           | 1.361   | 1.127    |               |         |         |
| 406 | <i>Snx7</i>          | 0.692          | 1.057  | 1.347   | ns       | 0.722           | 0.851   |          | 1.383         | 1.725   | 1.044   |
| 407 | <i>Rcn3</i>          | 0.691          | 0.736  | ns      | ns       |                 |         |          |               |         |         |
| 408 | <i>Tgfb3</i>         | 0.691          | 0.846  | ns      | ns       |                 | 0.838   |          |               |         |         |
| 409 | <i>Clmp</i>          | 0.691          | 0.757  | ns      | ns       |                 |         |          |               |         |         |
| 410 | <i>3632451O06Rik</i> | 0.689          | 1.424  | ns      | ns       | 0.810           | 1.031   |          |               |         |         |
| 411 | <i>Lrrc59</i>        | 0.689          | ns     | ns      | ns       |                 |         |          |               |         |         |
| 412 | <i>Fam13c</i>        | 0.688          | ns     | ns      | ns       | 0.824           | 0.825   |          |               |         |         |
| 413 | <i>Capn6</i>         | 0.688          | 1.773  | ns      | ns       | 1.022           | 0.766   |          |               |         |         |
| 414 | <i>Lima1</i>         | 0.686          | 0.795  | 0.892   | ns       | 0.667           | 0.686   |          | 1.859         | 1.268   |         |
| 415 | <i>2610034B18Rik</i> | 0.685          | 0.635  | ns      | ns       |                 | 0.747   |          |               |         |         |
| 416 | <i>Avpi1</i>         | 0.684          | ns     | ns      | ns       |                 |         |          |               |         |         |
| 417 | <i>Depdc7</i>        | 0.681          | ns     | ns      | ns       |                 |         |          |               |         |         |
| 418 | <i>Al607873</i>      | 0.68           | ns     | ns      | ns       |                 |         |          |               |         |         |
| 419 | <i>B4galt5</i>       | 0.679          | ns     | ns      | ns       |                 |         |          |               |         |         |
| 420 | <i>Rrbp1</i>         | 0.677          | 0.591  | 0.895   | ns       |                 | 0.661   |          | 1.263         | 1.317   |         |
| 421 | <i>Gmds</i>          | 0.677          | ns     | ns      | ns       |                 |         |          |               |         |         |
| 422 | <i>Gas8</i>          | 0.675          | ns     | ns      | ns       |                 |         |          |               |         |         |
| 423 | <i>Pea15a</i>        | 0.674          | ns     | ns      | ns       |                 |         |          |               |         |         |
| 424 | <i>Siglec1</i>       | 0.674          | ns     | ns      | ns       |                 |         |          |               |         |         |
| 425 | <i>Ctsl</i>          | 0.674          | ns     | ns      | ns       |                 | 0.621   |          |               |         |         |
| 426 | <i>Rcan1</i>         | 0.674          | ns     | ns      | ns       |                 | 0.935   |          |               |         |         |
| 427 | <i>Ppfibp1</i>       | 0.674          | 0.689  | ns      | ns       |                 |         |          | 1.248         |         |         |
| 428 | <i>Dnm3os</i>        | 0.672          | 1.324  | ns      | ns       |                 | 0.706   |          |               |         |         |
| 429 | <i>Fxyd6</i>         | 0.671          | 0.863  | -0.616  | ns       | 0.864           | 0.855   | 0.696    | 1.422         |         |         |
| 430 | <i>Srxn1</i>         | 0.671          | ns     | ns      | ns       |                 |         |          |               |         |         |
| 431 | <i>Fam114a1</i>      | 0.671          | 0.992  | 1.438   | ns       | 0.585           | 1.047   |          |               |         |         |
| 432 | <i>Prrx1</i>         | 0.671          | 0.726  | ns      | ns       |                 | 0.630   |          |               |         |         |
| 433 | <i>Kdelc2</i>        | 0.67           | 0.768  | 0.899   | ns       |                 | 0.913   |          |               |         |         |
| 434 | <i>Phf11a</i>        | 0.669          | ns     | ns      | ns       |                 |         |          |               |         |         |
| 435 | <i>Ccdc36</i>        | 0.665          | ns     | ns      | ns       |                 |         |          |               |         |         |
| 436 | <i>Lrrc32</i>        | 0.664          | ns     | ns      | ns       |                 |         |          |               |         |         |
| 437 | <i>Adck4</i>         | 0.664          | ns     | ns      | ns       |                 |         |          |               |         |         |
| 438 | <i>Fn1</i>           | 0.664          | 1.597  | 2.158   | 1.55     |                 | 0.686   | 0.785    | 3.183         | 2.543   |         |
| 439 | <i>Ltbp1</i>         | 0.663          | 0.877  | ns      | ns       | 0.741           | 0.680   |          | 1.895         | 1.826   |         |
| 440 | <i>Fmn1</i>          | 0.663          | 1.217  | ns      | ns       | 0.770           | 1.126   |          |               |         |         |

| No. | Gene Name            | TC-whole joint |        |         |          | DMM-whole joint |         |          | DMM-cartilage |         |         |
|-----|----------------------|----------------|--------|---------|----------|-----------------|---------|----------|---------------|---------|---------|
|     |                      | 1 Day          | 1 Week | 6 Weeks | 12 Weeks | 2 Weeks         | 4 Weeks | 16 Weeks | 1 Week        | 2 Weeks | 6 Weeks |
| 441 | <i>Clec11a</i>       | 0.662          | 0.851  | 1.865   | ns       | 0.635           | 0.776   |          |               |         |         |
| 442 | <i>Gjc1</i>          | 0.657          | ns     | ns      | ns       | 0.843           | 1.067   |          |               |         |         |
| 443 | <i>Pdia6</i>         | 0.657          | ns     | ns      | ns       |                 |         |          |               |         |         |
| 444 | <i>Prss23</i>        | 0.656          | ns     | ns      | ns       |                 | 0.941   |          |               |         |         |
| 445 | <i>10-Sep</i>        | 0.654          | ns     | ns      | ns       |                 |         |          |               |         |         |
| 446 | <i>Vsig4</i>         | 0.653          | 0.683  | 2.94    | ns       |                 |         |          |               |         |         |
| 447 | <i>Clip3</i>         | 0.652          | 1.077  | ns      | ns       |                 |         |          |               |         |         |
| 448 | <i>Glis2</i>         | 0.651          | 1.038  | ns      | ns       | 0.613           | 0.727   |          |               |         |         |
| 449 | <i>Ms4a4d</i>        | 0.649          | ns     | ns      | ns       |                 |         |          |               |         |         |
| 450 | <i>Dkk3</i>          | 0.648          | 1.848  | ns      | ns       | 1.373           | 1.360   | 1.165    |               |         |         |
| 451 | <i>Tspan6</i>        | 0.646          | 1.222  | ns      | ns       | 0.775           | 0.871   |          | 1.544         | 1.232   |         |
| 452 | <i>Dnajc25</i>       | 0.644          | ns     | ns      | ns       |                 | 0.660   |          |               |         |         |
| 453 | <i>Npdc1</i>         | 0.644          | 0.974  | ns      | 1.233    | 0.592           | 0.745   |          |               |         |         |
| 454 | <i>Enc1</i>          | 0.643          | ns     | ns      | ns       |                 |         |          |               |         |         |
| 455 | <i>Kctd11</i>        | 0.643          | 0.795  | ns      | ns       |                 |         |          |               |         |         |
| 456 | <i>Gfra1</i>         | 0.643          | ns     | ns      | ns       |                 |         |          |               |         |         |
| 457 | <i>Lrig3</i>         | 0.641          | 1.025  | ns      | ns       | 0.812           | 0.680   |          |               |         |         |
| 458 | <i>Gatsl3</i>        | 0.64           | ns     | ns      | ns       |                 |         |          |               |         |         |
| 459 | <i>Coro6</i>         | 0.637          | ns     | ns      | ns       |                 |         |          |               |         |         |
| 460 | <i>Plk2</i>          | 0.634          | ns     | ns      | ns       |                 |         |          |               |         |         |
| 461 | <i>Ednrb</i>         | 0.634          | ns     | ns      | ns       |                 |         |          |               |         |         |
| 462 | <i>Loxl2</i>         | 0.634          | 1.631  | 1.127   | ns       |                 | 2.041   |          |               | 1.275   |         |
| 463 | <i>Cyr61</i>         | 0.633          | 0.805  | ns      | ns       |                 | 0.813   |          | 2.700         | 2.367   |         |
| 464 | <i>Gas6</i>          | 0.633          | ns     | ns      | ns       |                 |         |          |               |         |         |
| 465 | <i>Cmklr1</i>        | 0.633          | ns     | ns      | ns       |                 |         |          |               |         |         |
| 466 | <i>Npl</i>           | 0.63           | ns     | ns      | 0.973    |                 |         |          |               |         |         |
| 467 | <i>Mvp</i>           | 0.63           | ns     | ns      | ns       |                 |         |          |               |         |         |
| 468 | <i>Trim47</i>        | 0.627          | 1.008  | ns      | ns       |                 | 0.655   |          |               |         |         |
| 469 | <i>A630033H2ORik</i> | 0.625          | 0.728  | ns      | ns       | 0.974           | 0.841   |          |               |         |         |
| 470 | <i>Pofut2</i>        | 0.624          | 0.816  | ns      | ns       | 0.722           | 0.670   |          |               |         |         |
| 471 | <i>Mxra8</i>         | 0.624          | 1.015  | 0.823   | ns       | 0.658           | 0.856   |          |               |         |         |
| 472 | <i>Itgbl1</i>        | 0.624          | 1.408  | ns      | ns       | 1.369           | 1.528   |          |               |         |         |
| 473 | <i>Pvr13</i>         | 0.623          | 0.971  | ns      | ns       | 1.019           | 1.136   |          | 1.476         | 0.713   |         |
| 474 | <i>Arl6</i>          | 0.621          | ns     | ns      | ns       |                 |         |          |               |         |         |
| 475 | <i>Ikbip</i>         | 0.619          | 0.892  | 0.928   | ns       | 0.806           | 0.996   |          |               |         |         |
| 476 | <i>Serpinb6a</i>     | 0.619          | ns     | ns      | ns       |                 |         |          |               |         |         |
| 477 | <i>Adap2</i>         | 0.617          | ns     | ns      | ns       |                 |         |          |               |         |         |
| 478 | <i>Magee1</i>        | 0.617          | ns     | ns      | ns       |                 | 0.674   |          |               |         |         |
| 479 | <i>Fkbp1b</i>        | 0.616          | ns     | ns      | ns       |                 |         |          |               |         |         |
| 480 | <i>Nr2f6</i>         | 0.613          | ns     | ns      | ns       |                 |         |          |               |         |         |
| 481 | <i>Sec24d</i>        | 0.606          | 0.862  | ns      | ns       |                 | 0.694   |          |               | 1.720   |         |
| 482 | <i>Ecm1</i>          | 0.603          | 1.183  | ns      | ns       | 0.680           | 0.786   |          | 1.210         | 1.823   |         |
| 483 | <i>Baiap2</i>        | 0.6            | 1.038  | ns      | ns       |                 |         |          |               | 1.814   |         |
| 484 | <i>Selm</i>          | 0.597          | ns     | ns      | ns       |                 |         |          |               |         |         |
| 485 | <i>Eva1b</i>         | 0.594          | ns     | ns      | ns       |                 |         |          |               |         |         |
| 486 | <i>C1qtnf6</i>       | 0.593          | 1.483  | ns      | ns       | 0.597           | 0.707   |          |               |         |         |
| 487 | <i>Cd68</i>          | 0.591          | ns     | ns      | ns       |                 |         |          |               |         |         |
| 488 | <i>Mybl1</i>         | 0.59           | ns     | ns      | ns       |                 |         |          |               |         |         |
| 489 | <i>Rab34</i>         | 0.589          | 0.77   | ns      | ns       |                 | 0.658   |          |               |         |         |
| 490 | <i>Hpgds</i>         | 0.588          | ns     | ns      | ns       |                 |         |          |               |         |         |
| 491 | <i>Ggt5</i>          | 0.586          | ns     | ns      | ns       |                 |         |          |               |         |         |
| 492 | <i>Prrg1</i>         | 0.585          | ns     | ns      | ns       |                 | 0.637   |          |               |         |         |
| 493 | <i>Man2a1</i>        | 0.583          | ns     | ns      | ns       |                 |         |          |               |         |         |
| 494 | <i>Adcy2</i>         | 0.583          | ns     | ns      | ns       | 0.647           |         |          |               |         |         |
| 495 | <i>Mamstr</i>        | 0.582          | ns     | ns      | ns       |                 |         |          |               |         |         |
| 496 | <i>Gpm6b</i>         | 0.582          | 1.023  | ns      | ns       | 1.209           | 1.840   |          |               |         |         |
| 497 | <i>Gm6307</i>        | -0.583         | -0.897 | ns      | ns       |                 |         |          |               |         |         |
| 498 | <i>Pvalb</i>         | -0.587         | ns     | ns      | ns       |                 |         |          |               |         |         |
| 499 | <i>Col9a1</i>        | -0.587         | ns     | ns      | ns       |                 |         |          |               |         |         |
| 500 | <i>Acaca</i>         | -0.588         | ns     | ns      | ns       |                 |         |          |               |         |         |
| 501 | <i>Pygm</i>          | -0.592         | ns     | ns      | ns       |                 |         |          |               |         |         |
| 502 | <i>Cilp2</i>         | -0.593         | ns     | ns      | ns       |                 |         |          |               |         |         |
| 503 | <i>Hapln1</i>        | -0.594         | ns     | 1.649   | ns       |                 |         |          |               |         |         |
| 504 | <i>Dgat2</i>         | -0.595         | ns     | ns      | ns       |                 |         |          |               |         |         |



| No. | Gene Name            | TC-whole joint |           |           |           | DMM-whole joint |         |          | DMM-cartilage |         |         |
|-----|----------------------|----------------|-----------|-----------|-----------|-----------------|---------|----------|---------------|---------|---------|
|     |                      | 1 Day          | 1 Week    | 6 Weeks   | 12 Weeks  | 2 Weeks         | 4 Weeks | 16 Weeks | 1 Week        | 2 Weeks | 6 Weeks |
| 505 | <i>Ky</i>            | -0.596         | <i>ns</i> | <i>ns</i> | <i>ns</i> |                 |         |          |               |         |         |
| 506 | <i>Mylk4</i>         | -0.598         | <i>ns</i> | <i>ns</i> | <i>ns</i> |                 |         |          |               |         |         |
| 507 | <i>1300017J02Rik</i> | -0.599         | <i>ns</i> | <i>ns</i> | <i>ns</i> |                 |         |          |               |         |         |
| 508 | <i>Zfp773</i>        | -0.602         | <i>ns</i> | <i>ns</i> | <i>ns</i> |                 |         |          |               |         |         |
| 509 | <i>Orm1</i>          | -0.607         | <i>ns</i> | <i>ns</i> | <i>ns</i> |                 |         |          |               |         |         |
| 510 | <i>Bex4</i>          | -0.615         | <i>ns</i> | <i>ns</i> | <i>ns</i> |                 |         |          |               |         |         |
| 511 | <i>Btnl10</i>        | -0.616         | <i>ns</i> | <i>ns</i> | <i>ns</i> |                 |         |          |               |         |         |
| 512 | <i>Gp6</i>           | -0.618         | <i>ns</i> | <i>ns</i> | <i>ns</i> |                 |         |          |               |         |         |
| 513 | <i>Sema3e</i>        | -0.619         | <i>ns</i> | <i>ns</i> | <i>ns</i> |                 |         |          |               |         |         |
| 514 | <i>Frat2</i>         | -0.621         | <i>ns</i> | <i>ns</i> | <i>ns</i> |                 |         |          |               |         |         |
| 515 | <i>Pcx</i>           | -0.623         | <i>ns</i> | <i>ns</i> | <i>ns</i> |                 |         |          |               |         |         |
| 516 | <i>Synpo2</i>        | -0.628         | <i>ns</i> | <i>ns</i> | <i>ns</i> |                 |         |          |               |         |         |
| 517 | <i>Gm9895</i>        | -0.631         | <i>ns</i> | <i>ns</i> | <i>ns</i> |                 |         |          |               |         |         |
| 518 | <i>Tpi1</i>          | -0.635         | <i>ns</i> | -0.969    | <i>ns</i> |                 |         |          |               |         |         |
| 519 | <i>Vpreb1</i>        | -0.641         | <i>ns</i> | <i>ns</i> | <i>ns</i> |                 |         |          |               |         |         |
| 520 | <i>Fcer2a</i>        | -0.649         | <i>ns</i> | <i>ns</i> | <i>ns</i> |                 |         |          |               |         |         |
| 521 | <i>Prg3</i>          | -0.656         | <i>ns</i> | <i>ns</i> | <i>ns</i> |                 |         |          |               |         |         |
| 522 | <i>Map3k7cl</i>      | -0.661         | <i>ns</i> | <i>ns</i> | <i>ns</i> |                 |         |          |               |         |         |
| 523 | <i>Pgam2</i>         | -0.662         | <i>ns</i> | <i>ns</i> | <i>ns</i> |                 |         |          |               |         |         |
| 524 | <i>Fsd2</i>          | -0.663         | <i>ns</i> | <i>ns</i> | <i>ns</i> |                 |         |          |               |         |         |
| 525 | <i>Tob1</i>          | -0.663         | <i>ns</i> | <i>ns</i> | <i>ns</i> |                 |         |          |               |         |         |
| 526 | <i>Acss2</i>         | -0.664         | <i>ns</i> | <i>ns</i> | <i>ns</i> |                 |         |          |               |         |         |
| 527 | <i>Ostn</i>          | -0.666         | <i>ns</i> | <i>ns</i> | <i>ns</i> |                 |         |          |               |         |         |
| 528 | <i>Mgl2</i>          | -0.668         | <i>ns</i> | <i>ns</i> | <i>ns</i> |                 |         |          |               |         |         |
| 529 | <i>Lect1</i>         | -0.672         | <i>ns</i> | 0.982     | <i>ns</i> |                 |         |          |               |         |         |
| 530 | <i>Myh2</i>          | -0.676         | -1.524    | <i>ns</i> | <i>ns</i> |                 |         |          |               |         |         |
| 531 | <i>Tnxb</i>          | -0.677         | <i>ns</i> | <i>ns</i> | <i>ns</i> |                 |         |          |               |         |         |
| 532 | <i>Klhl33</i>        | -0.687         | <i>ns</i> | <i>ns</i> | <i>ns</i> |                 |         |          |               |         |         |
| 533 | <i>Plcd4</i>         | -0.688         | <i>ns</i> | <i>ns</i> | <i>ns</i> |                 |         |          |               |         |         |
| 534 | <i>Tac2</i>          | -0.696         | <i>ns</i> | <i>ns</i> | <i>ns</i> |                 |         |          |               |         |         |
| 535 | <i>Ampd1</i>         | -0.698         | <i>ns</i> | <i>ns</i> | <i>ns</i> |                 |         |          |               |         |         |
| 536 | <i>Aldh1a7</i>       | -0.7           | <i>ns</i> | <i>ns</i> | <i>ns</i> |                 |         |          |               |         |         |
| 537 | <i>Casq1</i>         | -0.705         | <i>ns</i> | <i>ns</i> | <i>ns</i> |                 |         |          |               |         |         |
| 538 | <i>Ppl</i>           | -0.705         | <i>ns</i> | <i>ns</i> | <i>ns</i> |                 |         |          |               |         |         |
| 539 | <i>Kcng4</i>         | -0.706         | <i>ns</i> | <i>ns</i> | <i>ns</i> |                 |         |          |               |         |         |
| 540 | <i>Col10a1</i>       | -0.712         | -0.602    | 2.296     | <i>ns</i> |                 |         |          |               |         |         |
| 541 | <i>Abra</i>          | -0.712         | -0.799    | <i>ns</i> | <i>ns</i> |                 |         |          |               |         |         |
| 542 | <i>Gsn</i>           | -0.737         | <i>ns</i> | <i>ns</i> | <i>ns</i> |                 |         |          |               |         |         |
| 543 | <i>Nrep</i>          | -0.742         | <i>ns</i> | <i>ns</i> | <i>ns</i> |                 |         |          |               |         |         |
| 544 | <i>6430571L13Rik</i> | -0.746         | <i>ns</i> | <i>ns</i> | <i>ns</i> |                 |         |          |               |         |         |
| 545 | <i>Lsmem1</i>        | -0.753         | <i>ns</i> | <i>ns</i> | <i>ns</i> |                 |         |          |               |         |         |
| 546 | <i>Gpd1</i>          | -0.771         | <i>ns</i> | <i>ns</i> | <i>ns</i> |                 |         |          |               |         |         |
| 547 | <i>Apobec2</i>       | -0.792         | -0.675    | <i>ns</i> | <i>ns</i> |                 |         |          |               |         |         |
| 548 | <i>Itgb1bp2</i>      | -0.807         | <i>ns</i> | <i>ns</i> | <i>ns</i> |                 |         |          |               |         |         |
| 549 | <i>Pamr1</i>         | -0.812         | 1.945     | 1.265     | 1.27      | 1.257           | 1.200   |          |               |         |         |
| 550 | <i>Olfr420</i>       | -0.825         | <i>ns</i> | 2.071     | <i>ns</i> |                 |         |          |               |         |         |
| 551 | <i>Mlf1</i>          | -0.838         | -0.593    | <i>ns</i> | <i>ns</i> |                 |         |          |               |         |         |
| 552 | <i>Eno3</i>          | -0.848         | -0.717    | -0.891    | <i>ns</i> |                 |         |          | -2.028        | -1.408  |         |
| 553 | <i>Dupd1</i>         | -0.858         | <i>ns</i> | -0.609    | <i>ns</i> |                 |         |          |               |         |         |
| 554 | <i>Pfkfb1</i>        | -0.872         | -0.617    | <i>ns</i> | <i>ns</i> |                 |         |          | -0.900        |         |         |
| 555 | <i>Cdo1</i>          | -0.885         | <i>ns</i> | <i>ns</i> | <i>ns</i> |                 |         |          |               |         |         |
| 556 | <i>Myoc</i>          | -0.9           | <i>ns</i> | <i>ns</i> | <i>ns</i> | -1.225          | -0.880  |          |               |         |         |
| 557 | <i>Ccl24</i>         | -0.905         | <i>ns</i> | <i>ns</i> | <i>ns</i> |                 |         |          |               |         |         |
| 558 | <i>Tceal7</i>        | -0.907         | <i>ns</i> | <i>ns</i> | <i>ns</i> |                 |         |          |               |         |         |
| 559 | <i>Nnat</i>          | -0.91          | <i>ns</i> | <i>ns</i> | <i>ns</i> |                 | -1.425  |          |               |         |         |
| 560 | <i>G630055G22Rik</i> | -0.91          | <i>ns</i> | <i>ns</i> | <i>ns</i> |                 |         |          |               |         |         |
| 561 | <i>Matn3</i>         | -0.922         | <i>ns</i> | <i>ns</i> | <i>ns</i> |                 |         |          |               |         |         |
| 562 | <i>Yipf7</i>         | -0.923         | -0.816    | <i>ns</i> | <i>ns</i> |                 |         |          |               |         |         |
| 563 | <i>Slc47a1</i>       | -0.923         | -0.962    | <i>ns</i> | <i>ns</i> |                 |         |          |               |         |         |
| 564 | <i>Dhrs7c</i>        | -0.928         | <i>ns</i> | <i>ns</i> | <i>ns</i> |                 |         |          |               |         |         |
| 565 | <i>Clec3b</i>        | -0.958         | 0.952     | <i>ns</i> | <i>ns</i> |                 | 0.647   |          |               |         |         |
| 566 | <i>Amd1</i>          | -0.959         | <i>ns</i> | <i>ns</i> | <i>ns</i> |                 |         |          |               |         |         |
| 567 | <i>Timp4</i>         | -0.961         | -0.747    | <i>ns</i> | <i>ns</i> |                 | -0.822  |          | -2.063        |         |         |
| 568 | <i>Smco1</i>         | -0.967         | <i>ns</i> | <i>ns</i> | <i>ns</i> |                 |         |          |               |         |         |

| No. | Gene Name            | TC-whole joint |        |         |          | DMM-whole joint |         |          | DMM-cartilage |         |         |
|-----|----------------------|----------------|--------|---------|----------|-----------------|---------|----------|---------------|---------|---------|
|     |                      | 1 Day          | 1 Week | 6 Weeks | 12 Weeks | 2 Weeks         | 4 Weeks | 16 Weeks | 1 Week        | 2 Weeks | 6 Weeks |
| 569 | <i>Sbk2</i>          | -0.972         | -1.127 | -1.221  | ns       |                 |         |          |               |         |         |
| 570 | <i>Scd1</i>          | -0.974         | ns     | ns      | ns       |                 |         |          |               |         |         |
| 571 | <i>Gdap1</i>         | -0.976         | ns     | ns      | ns       |                 |         |          |               |         |         |
| 572 | <i>Adig</i>          | -1.016         | ns     | -1.732  | ns       |                 | -0.653  |          |               |         |         |
| 573 | <i>2310065F04Rik</i> | -1.044         | ns     | ns      | ns       |                 |         |          |               |         |         |
| 574 | <i>Kcnc1</i>         | -1.088         | ns     | ns      | ns       |                 |         |          |               |         |         |
| 575 | <i>Ucma</i>          | -1.102         | ns     | ns      | ns       |                 |         |          |               |         |         |
| 576 | <i>Smox</i>          | -1.126         | ns     | ns      | ns       |                 |         |          |               |         |         |
| 577 | <i>Myl2</i>          | -1.144         | -2.132 | -2.417  | ns       |                 |         |          |               |         |         |
| 578 | <i>Pon1</i>          | -1.151         | ns     | ns      | ns       |                 |         |          |               |         |         |
| 579 | <i>Aqp4</i>          | -1.158         | ns     | ns      | ns       |                 |         |          |               |         |         |
| 580 | <i>Perm1</i>         | -1.16          | -1.044 | ns      | ns       |                 |         |          |               |         |         |
| 581 | <i>Htra4</i>         | -1.208         | 0.711  | 1.302   | ns       |                 | 0.857   |          |               |         |         |
| 582 | <i>Csrp3</i>         | -1.229         | -1.433 | -0.815  | ns       |                 |         |          |               |         |         |
| 583 | <i>Slurp1</i>        | -1.244         | ns     | ns      | ns       |                 |         |          |               |         |         |
| 584 | <i>Fasn</i>          | -1.247         | ns     | ns      | ns       |                 |         |          |               |         |         |
| 585 | <i>Tmem45b</i>       | -1.266         | -0.75  | ns      | ns       | -1.079          | -1.007  |          |               |         |         |
| 586 | <i>Pck1</i>          | -1.273         | -0.866 | ns      | ns       | -1.354          |         |          |               |         |         |
| 587 | <i>C7</i>            | -1.275         | ns     | ns      | ns       |                 |         |          |               |         |         |
| 588 | <i>Ces1d</i>         | -1.282         | ns     | ns      | ns       | -0.962          | -1.326  |          |               |         |         |
| 589 | <i>Retn</i>          | -1.3           | -1.471 | ns      | ns       |                 | -0.784  |          |               |         |         |
| 590 | <i>Cyp2e1</i>        | -1.323         | -1.103 | ns      | ns       |                 |         |          |               |         |         |
| 591 | <i>Pla1a</i>         | -1.384         | ns     | ns      | ns       |                 |         |          |               |         |         |
| 592 | <i>Thrsp</i>         | -1.394         | -0.782 | ns      | ns       |                 | -0.892  |          |               |         |         |
| 593 | <i>Cyt1</i>          | -1.407         | -1.502 | ns      | ns       | -1.430          | -1.295  |          |               |         |         |
| 594 | <i>Pnpla3</i>        | -1.58          | ns     | ns      | ns       |                 |         |          |               |         |         |
| 595 | <i>Mybph</i>         | -1.652         | ns     | ns      | ns       |                 |         |          |               |         |         |
| 596 | <i>Mettl21c</i>      | -1.746         | ns     | ns      | ns       |                 |         |          |               |         |         |
| 597 | <i>Actc1</i>         | -1.944         | -1.715 | ns      | ns       |                 |         |          |               |         |         |
| 598 | <i>Retnla</i>        | -2.169         | -0.598 | ns      | ns       |                 |         |          |               |         |         |
| 599 | <i>C130080G10Rik</i> | -2.921         | ns     | ns      | ns       |                 |         |          |               |         |         |
| 600 | <i>Klhl34</i>        | ns             | -1.562 | -0.996  | -0.764   |                 |         |          |               |         |         |
| 601 | <i>Comp</i>          | ns             | 0.988  | 1.087   | 0.837    |                 |         | 0.764    |               |         |         |
| 602 | <i>Antxr1</i>        | ns             | 1.752  | 1.888   | 1.086    | 1.107           | 1.640   | 1.248    |               |         | 1.567   |
| 603 | <i>Htra1</i>         | ns             | 1.341  | 0.855   | 1.197    | 1.007           | 1.283   | 1.516    |               |         |         |
| 604 | <i>Hbegf</i>         | ns             | 0.691  | 1.052   | 1.284    |                 | 0.896   |          | 2.235         | 1.907   |         |
| 605 | <i>Fbln7</i>         | ns             | 1.536  | 1.932   | 1.305    |                 | 1.197   |          |               | 3.030   |         |
| 606 | <i>Mmp2</i>          | ns             | 1.715  | 1.752   | 1.46     | 1.113           | 1.700   | 1.323    |               |         |         |
| 607 | <i>Scara3</i>        | ns             | 0.706  | 1.746   | 1.686    |                 | 0.872   | 0.801    |               |         |         |
| 608 | <i>Anxa8</i>         | ns             | 1.654  | 2.452   | 2.056    | 0.751           | 0.765   | 1.016    |               | 0.706   |         |
| 609 | <i>Ccdc3</i>         | ns             | ns     | 0.798   | 0.919    |                 | 1.342   |          |               |         |         |
| 610 | <i>Ctgf</i>          | ns             | ns     | 1.177   | 1.023    |                 |         |          |               |         |         |
| 611 | <i>Lbp</i>           | ns             | ns     | 1.01    | 1.201    |                 | 0.857   |          |               |         |         |
| 612 | <i>Crip1</i>         | ns             | 0.934  | ns      | 0.978    |                 |         |          |               | 0.995   |         |
| 613 | <i>Sdc1</i>          | ns             | 0.933  | ns      | 0.997    | 0.708           | 1.141   |          |               |         |         |
| 614 | <i>Snhg18</i>        | ns             | 0.777  | ns      | 1.028    |                 |         |          |               |         |         |
| 615 | <i>Olfml2b</i>       | ns             | 0.711  | ns      | 1.304    |                 | 0.658   |          |               |         |         |
| 616 | <i>Nbl1</i>          | ns             | 1.421  | ns      | 1.642    | 0.875           | 1.209   | 1.079    | 1.821         | 2.268   |         |
| 617 | <i>Tigd4</i>         | ns             | ns     | ns      | -1.933   |                 |         |          |               |         |         |
| 618 | <i>Pgpep1l</i>       | ns             | ns     | ns      | -1.334   |                 |         |          |               |         |         |
| 619 | <i>Ovol1</i>         | ns             | ns     | ns      | -1.262   |                 |         |          |               |         |         |
| 620 | <i>Car8</i>          | ns             | ns     | ns      | -1.223   |                 |         |          |               |         |         |
| 621 | <i>Cpeb2</i>         | ns             | ns     | ns      | -1.157   |                 |         |          |               |         |         |
| 622 | <i>C1galt1</i>       | ns             | ns     | ns      | -1.055   |                 |         |          |               |         |         |
| 623 | <i>Nudt12</i>        | ns             | ns     | ns      | -1.046   |                 |         |          |               |         |         |
| 624 | <i>Trim24</i>        | ns             | ns     | ns      | -1.02    |                 |         |          |               |         |         |
| 625 | <i>Nexn</i>          | ns             | ns     | ns      | -0.98    |                 |         |          |               |         |         |
| 626 | <i>Slc12a2*</i>      | ns             | ns     | ns      | -0.932   | 0.669           |         |          |               |         |         |
| 627 | <i>Dyrk2</i>         | ns             | ns     | ns      | -0.905   |                 |         |          |               |         |         |
| 628 | <i>Akap6</i>         | ns             | ns     | ns      | -0.878   |                 |         |          |               |         |         |
| 629 | <i>Esco1</i>         | ns             | ns     | ns      | -0.86    |                 |         |          |               |         |         |
| 630 | <i>Cdkl2</i>         | ns             | ns     | ns      | -0.854   |                 |         |          |               |         |         |
| 631 | <i>Impad1</i>        | ns             | ns     | ns      | -0.838   |                 |         |          |               |         |         |
| 632 | <i>Qk</i>            | ns             | ns     | ns      | -0.813   |                 |         |          |               |         |         |

| No. | Gene Name            | TC-whole joint |           |           |          | DMM-whole joint |         |          | DMM-cartilage |         |         |
|-----|----------------------|----------------|-----------|-----------|----------|-----------------|---------|----------|---------------|---------|---------|
|     |                      | 1 Day          | 1 Week    | 6 Weeks   | 12 Weeks | 2 Weeks         | 4 Weeks | 16 Weeks | 1 Week        | 2 Weeks | 6 Weeks |
| 633 | <i>Mib1</i>          | <i>ns</i>      | <i>ns</i> | <i>ns</i> | -0.802   |                 |         |          |               |         |         |
| 634 | <i>Arrdc3</i>        | <i>ns</i>      | <i>ns</i> | <i>ns</i> | -0.789   |                 |         |          |               |         |         |
| 635 | <i>Rmnd5a</i>        | <i>ns</i>      | <i>ns</i> | <i>ns</i> | -0.773   |                 |         |          |               |         |         |
| 636 | <i>Gm9159</i>        | <i>ns</i>      | <i>ns</i> | <i>ns</i> | -0.736   |                 |         |          |               |         |         |
| 637 | <i>Rhobtb3</i>       | <i>ns</i>      | <i>ns</i> | <i>ns</i> | -0.731   |                 |         |          |               |         |         |
| 638 | <i>Klhl31</i>        | <i>ns</i>      | <i>ns</i> | <i>ns</i> | -0.718   |                 |         |          |               |         |         |
| 639 | <i>Arhgap20</i>      | <i>ns</i>      | <i>ns</i> | <i>ns</i> | -0.704   |                 |         |          |               |         |         |
| 640 | <i>Atxn7</i>         | <i>ns</i>      | <i>ns</i> | <i>ns</i> | -0.693   |                 |         |          |               |         |         |
| 641 | <i>Taf13</i>         | <i>ns</i>      | <i>ns</i> | <i>ns</i> | -0.681   |                 |         |          |               |         |         |
| 642 | <i>Rabac1</i>        | <i>ns</i>      | <i>ns</i> | <i>ns</i> | 0.714    |                 |         |          |               |         |         |
| 643 | <i>Ctsq</i>          | <i>ns</i>      | <i>ns</i> | <i>ns</i> | 0.736    |                 |         |          |               |         |         |
| 644 | <i>Selplg</i>        | <i>ns</i>      | <i>ns</i> | <i>ns</i> | 0.746    |                 |         |          |               |         |         |
| 645 | <i>Preli1</i>        | <i>ns</i>      | <i>ns</i> | <i>ns</i> | 0.752    |                 |         |          |               |         |         |
| 646 | <i>Prkab1</i>        | <i>ns</i>      | <i>ns</i> | <i>ns</i> | 0.759    |                 |         |          |               |         |         |
| 647 | <i>Pfn1</i>          | <i>ns</i>      | <i>ns</i> | <i>ns</i> | 0.777    |                 |         |          |               |         |         |
| 648 | <i>Prss34</i>        | <i>ns</i>      | <i>ns</i> | <i>ns</i> | 0.789    |                 |         |          |               |         |         |
| 649 | <i>Rbm38</i>         | <i>ns</i>      | <i>ns</i> | <i>ns</i> | 0.805    |                 |         |          |               |         |         |
| 650 | <i>Cenpa</i>         | <i>ns</i>      | <i>ns</i> | <i>ns</i> | 0.813    |                 |         |          |               |         |         |
| 651 | <i>Gipc1</i>         | <i>ns</i>      | <i>ns</i> | <i>ns</i> | 0.814    |                 |         |          |               |         |         |
| 652 | <i>Mrto4</i>         | <i>ns</i>      | <i>ns</i> | <i>ns</i> | 0.82     |                 |         |          |               |         |         |
| 653 | <i>Napsa</i>         | <i>ns</i>      | <i>ns</i> | <i>ns</i> | 0.828    |                 |         |          |               |         |         |
| 654 | <i>Tmem106c</i>      | <i>ns</i>      | <i>ns</i> | <i>ns</i> | 0.844    |                 |         |          |               |         |         |
| 655 | <i>Dnajb1</i>        | <i>ns</i>      | <i>ns</i> | <i>ns</i> | 0.848    |                 |         |          |               |         |         |
| 656 | <i>Cdk2ap2</i>       | <i>ns</i>      | <i>ns</i> | <i>ns</i> | 0.857    |                 |         |          |               |         |         |
| 657 | <i>Pdcd6</i>         | <i>ns</i>      | <i>ns</i> | <i>ns</i> | 0.866    |                 |         |          |               |         |         |
| 658 | <i>Hes6</i>          | <i>ns</i>      | <i>ns</i> | <i>ns</i> | 0.871    |                 |         |          |               |         |         |
| 659 | <i>Nr1h2</i>         | <i>ns</i>      | <i>ns</i> | <i>ns</i> | 0.872    |                 |         |          |               |         |         |
| 660 | <i>Slc29a1</i>       | <i>ns</i>      | <i>ns</i> | <i>ns</i> | 0.876    |                 |         |          |               |         |         |
| 661 | <i>Med28</i>         | <i>ns</i>      | <i>ns</i> | <i>ns</i> | 0.876    |                 |         |          |               |         |         |
| 662 | <i>Slc9a3r1</i>      | <i>ns</i>      | <i>ns</i> | <i>ns</i> | 0.879    |                 |         |          |               |         |         |
| 663 | <i>Ube2m</i>         | <i>ns</i>      | <i>ns</i> | <i>ns</i> | 0.881    |                 |         |          |               |         |         |
| 664 | <i>Eif4ebp1</i>      | <i>ns</i>      | <i>ns</i> | <i>ns</i> | 0.893    |                 |         |          |               |         |         |
| 665 | <i>Ltb*</i>          | <i>ns</i>      | <i>ns</i> | <i>ns</i> | 0.895    | -0.61369        |         |          |               |         |         |
| 666 | <i>Rbm42</i>         | <i>ns</i>      | <i>ns</i> | <i>ns</i> | 0.895    |                 |         |          |               |         |         |
| 667 | <i>Fzr1</i>          | <i>ns</i>      | <i>ns</i> | <i>ns</i> | 0.904    |                 |         |          |               |         |         |
| 668 | <i>Idnk</i>          | <i>ns</i>      | <i>ns</i> | <i>ns</i> | 0.905    |                 |         |          |               |         |         |
| 669 | <i>Ap2s1</i>         | <i>ns</i>      | <i>ns</i> | <i>ns</i> | 0.918    |                 |         |          |               |         |         |
| 670 | <i>Coa6</i>          | <i>ns</i>      | <i>ns</i> | <i>ns</i> | 0.927    |                 |         |          |               |         |         |
| 671 | <i>Fcho1</i>         | <i>ns</i>      | <i>ns</i> | <i>ns</i> | 0.937    |                 |         |          |               |         |         |
| 672 | <i>Pdk3</i>          | <i>ns</i>      | <i>ns</i> | <i>ns</i> | 0.939    |                 |         |          |               |         |         |
| 673 | <i>Rps18</i>         | <i>ns</i>      | <i>ns</i> | <i>ns</i> | 0.944    |                 |         |          |               |         |         |
| 674 | <i>Ftl1</i>          | <i>ns</i>      | <i>ns</i> | <i>ns</i> | 0.944    |                 |         |          |               |         |         |
| 675 | <i>Nmral1</i>        | <i>ns</i>      | <i>ns</i> | <i>ns</i> | 0.945    |                 |         |          |               |         |         |
| 676 | <i>Nhp2</i>          | <i>ns</i>      | <i>ns</i> | <i>ns</i> | 0.951    |                 |         |          |               |         |         |
| 677 | <i>Chst12</i>        | <i>ns</i>      | <i>ns</i> | <i>ns</i> | 0.952    |                 |         |          |               |         |         |
| 678 | <i>Eefsec</i>        | <i>ns</i>      | <i>ns</i> | <i>ns</i> | 0.954    |                 |         |          |               |         |         |
| 679 | <i>Tor2a</i>         | <i>ns</i>      | <i>ns</i> | <i>ns</i> | 0.961    |                 |         |          |               |         |         |
| 680 | <i>Capg</i>          | <i>ns</i>      | <i>ns</i> | <i>ns</i> | 0.965    |                 |         |          |               |         |         |
| 681 | <i>Pglyrp1</i>       | <i>ns</i>      | <i>ns</i> | <i>ns</i> | 0.967    |                 |         |          |               |         |         |
| 682 | <i>Creld2</i>        | <i>ns</i>      | <i>ns</i> | <i>ns</i> | 0.969    |                 |         |          |               |         |         |
| 683 | <i>Cd52</i>          | <i>ns</i>      | <i>ns</i> | <i>ns</i> | 0.97     |                 |         |          |               |         |         |
| 684 | <i>Cdca5*</i>        | <i>ns</i>      | <i>ns</i> | <i>ns</i> | 0.974    | -0.61209        |         |          |               |         |         |
| 685 | <i>Rpl28</i>         | <i>ns</i>      | <i>ns</i> | <i>ns</i> | 0.977    |                 |         |          |               |         |         |
| 686 | <i>Tmem134</i>       | <i>ns</i>      | <i>ns</i> | <i>ns</i> | 0.981    |                 |         |          |               |         |         |
| 687 | <i>Ccnd3</i>         | <i>ns</i>      | <i>ns</i> | <i>ns</i> | 0.981    |                 |         |          |               |         |         |
| 688 | <i>Tpst1</i>         | <i>ns</i>      | <i>ns</i> | <i>ns</i> | 0.995    |                 |         |          |               |         |         |
| 689 | <i>Cdc20</i>         | <i>ns</i>      | <i>ns</i> | <i>ns</i> | 0.999    |                 |         |          |               |         |         |
| 690 | <i>Rps2</i>          | <i>ns</i>      | <i>ns</i> | <i>ns</i> | 1.004    |                 |         |          |               |         |         |
| 691 | <i>Crif2</i>         | <i>ns</i>      | <i>ns</i> | <i>ns</i> | 1.007    |                 |         |          |               |         |         |
| 692 | <i>2700094K13Rik</i> | <i>ns</i>      | <i>ns</i> | <i>ns</i> | 1.008    |                 |         |          |               |         |         |
| 693 | <i>Ube2s</i>         | <i>ns</i>      | <i>ns</i> | <i>ns</i> | 1.011    |                 |         |          |               |         |         |
| 694 | <i>Lrg1</i>          | <i>ns</i>      | <i>ns</i> | <i>ns</i> | 1.014    |                 |         |          |               |         |         |
| 695 | <i>Tpst2</i>         | <i>ns</i>      | <i>ns</i> | <i>ns</i> | 1.017    |                 |         |          |               |         |         |
| 696 | <i>Cebpe</i>         | <i>ns</i>      | <i>ns</i> | <i>ns</i> | 1.017    |                 |         |          |               |         |         |

| No. | Gene Name            | TC-whole joint |           |           |           | DMM-whole joint |         |          | DMM-cartilage |         |         |
|-----|----------------------|----------------|-----------|-----------|-----------|-----------------|---------|----------|---------------|---------|---------|
|     |                      | 1 Day          | 1 Week    | 6 Weeks   | 12 Weeks  | 2 Weeks         | 4 Weeks | 16 Weeks | 1 Week        | 2 Weeks | 6 Weeks |
| 697 | <i>Def6</i>          | <i>ns</i>      | <i>ns</i> | <i>ns</i> | 1.018     |                 |         |          |               |         |         |
| 698 | <i>Tnfrsf1a</i>      | <i>ns</i>      | <i>ns</i> | <i>ns</i> | 1.024     |                 |         |          |               |         |         |
| 699 | <i>Limd2</i>         | <i>ns</i>      | <i>ns</i> | <i>ns</i> | 1.025     |                 |         |          |               |         |         |
| 700 | <i>Faim3</i>         | <i>ns</i>      | <i>ns</i> | <i>ns</i> | 1.034     |                 |         |          |               |         |         |
| 701 | <i>Tamm41</i>        | <i>ns</i>      | <i>ns</i> | <i>ns</i> | 1.036     |                 |         |          |               |         |         |
| 702 | <i>Fam212a</i>       | <i>ns</i>      | <i>ns</i> | <i>ns</i> | 1.043     |                 |         |          |               |         |         |
| 703 | <i>Nfe2</i>          | <i>ns</i>      | <i>ns</i> | <i>ns</i> | 1.057     |                 |         |          |               |         |         |
| 704 | <i>Fam173a</i>       | <i>ns</i>      | <i>ns</i> | <i>ns</i> | 1.063     |                 |         |          |               |         |         |
| 705 | <i>Rab3il1</i>       | <i>ns</i>      | <i>ns</i> | <i>ns</i> | 1.082     |                 |         |          |               |         |         |
| 706 | <i>Gch1</i>          | <i>ns</i>      | <i>ns</i> | <i>ns</i> | 1.082     |                 |         |          |               |         |         |
| 707 | <i>Rsph3a</i>        | <i>ns</i>      | <i>ns</i> | <i>ns</i> | 1.083     |                 |         |          |               |         |         |
| 708 | <i>Map3k11</i>       | <i>ns</i>      | <i>ns</i> | <i>ns</i> | 1.085     |                 |         |          |               |         |         |
| 709 | <i>Dok2</i>          | <i>ns</i>      | <i>ns</i> | <i>ns</i> | 1.098     |                 |         |          |               |         |         |
| 710 | <i>Itrip1</i>        | <i>ns</i>      | <i>ns</i> | <i>ns</i> | 1.099     |                 |         |          |               |         |         |
| 711 | <i>Ssbp4</i>         | <i>ns</i>      | <i>ns</i> | <i>ns</i> | 1.099     |                 |         |          |               |         |         |
| 712 | <i>E2f4</i>          | <i>ns</i>      | <i>ns</i> | <i>ns</i> | 1.101     |                 |         |          |               |         |         |
| 713 | <i>Arl11</i>         | <i>ns</i>      | <i>ns</i> | <i>ns</i> | 1.104     |                 |         |          |               |         |         |
| 714 | <i>Marcks1</i>       | <i>ns</i>      | <i>ns</i> | <i>ns</i> | 1.105     |                 |         |          |               |         |         |
| 715 | <i>Rdm1</i>          | <i>ns</i>      | <i>ns</i> | <i>ns</i> | 1.115     |                 |         |          |               |         |         |
| 716 | <i>Ppp4c</i>         | <i>ns</i>      | <i>ns</i> | <i>ns</i> | 1.123     |                 |         |          |               |         |         |
| 717 | <i>Efhd2</i>         | <i>ns</i>      | <i>ns</i> | <i>ns</i> | 1.126     |                 |         |          |               |         |         |
| 718 | <i>2210016F16Rik</i> | <i>ns</i>      | <i>ns</i> | <i>ns</i> | 1.129     |                 |         |          |               |         |         |
| 719 | <i>Rnh1</i>          | <i>ns</i>      | <i>ns</i> | <i>ns</i> | 1.147     |                 |         |          |               |         |         |
| 720 | <i>Asb6</i>          | <i>ns</i>      | <i>ns</i> | <i>ns</i> | 1.161     |                 |         |          |               |         |         |
| 721 | <i>Slc19a1</i>       | <i>ns</i>      | <i>ns</i> | <i>ns</i> | 1.162     |                 |         |          |               |         |         |
| 722 | <i>Sdf2l1</i>        | <i>ns</i>      | <i>ns</i> | <i>ns</i> | 1.165     |                 |         |          |               |         |         |
| 723 | <i>Hist1h2ab</i>     | <i>ns</i>      | <i>ns</i> | <i>ns</i> | 1.167     |                 |         |          |               |         |         |
| 724 | <i>S100a6</i>        | <i>ns</i>      | <i>ns</i> | <i>ns</i> | 1.172     |                 |         |          |               |         |         |
| 725 | <i>Coro1a*</i>       | <i>ns</i>      | <i>ns</i> | <i>ns</i> | 1.176     | -0.60832        |         |          |               |         |         |
| 726 | <i>Fam132a</i>       | <i>ns</i>      | <i>ns</i> | <i>ns</i> | 1.181     |                 |         |          |               |         |         |
| 727 | <i>H2afj</i>         | <i>ns</i>      | <i>ns</i> | <i>ns</i> | 1.19      |                 |         |          |               |         |         |
| 728 | <i>Cfp</i>           | <i>ns</i>      | <i>ns</i> | <i>ns</i> | 1.201     |                 |         |          |               |         |         |
| 729 | <i>Pla2g15</i>       | <i>ns</i>      | <i>ns</i> | <i>ns</i> | 1.201     |                 |         |          |               |         |         |
| 730 | <i>Ptpn18</i>        | <i>ns</i>      | <i>ns</i> | <i>ns</i> | 1.202     |                 |         |          |               |         |         |
| 731 | <i>Rpl18</i>         | <i>ns</i>      | <i>ns</i> | <i>ns</i> | 1.203     |                 |         |          |               |         |         |
| 732 | <i>Nenf</i>          | <i>ns</i>      | <i>ns</i> | <i>ns</i> | 1.205     |                 |         |          |               |         |         |
| 733 | <i>Plvap</i>         | <i>ns</i>      | <i>ns</i> | <i>ns</i> | 1.208     |                 |         |          |               |         |         |
| 734 | <i>Dok3</i>          | <i>ns</i>      | <i>ns</i> | <i>ns</i> | 1.215     |                 |         |          |               |         |         |
| 735 | <i>Emilin2</i>       | <i>ns</i>      | <i>ns</i> | <i>ns</i> | 1.217     |                 |         |          |               |         |         |
| 736 | <i>Cnpy3</i>         | <i>ns</i>      | <i>ns</i> | <i>ns</i> | 1.217     |                 |         |          |               |         |         |
| 737 | <i>Rhbdl1</i>        | <i>ns</i>      | <i>ns</i> | <i>ns</i> | 1.234     |                 |         |          |               |         |         |
| 738 | <i>Acot7</i>         | <i>ns</i>      | <i>ns</i> | <i>ns</i> | 1.255     |                 |         |          |               |         |         |
| 739 | <i>Ly6c2</i>         | <i>ns</i>      | <i>ns</i> | <i>ns</i> | 1.265     |                 |         |          |               |         |         |
| 740 | <i>Alg1</i>          | <i>ns</i>      | <i>ns</i> | <i>ns</i> | 1.274     |                 |         |          |               |         |         |
| 741 | <i>H2afx</i>         | <i>ns</i>      | <i>ns</i> | <i>ns</i> | 1.274     |                 |         |          |               |         |         |
| 742 | <i>Ptprcap</i>       | <i>ns</i>      | <i>ns</i> | <i>ns</i> | 1.286     |                 |         |          |               |         |         |
| 743 | <i>Kng1</i>          | <i>ns</i>      | <i>ns</i> | <i>ns</i> | 1.303     |                 |         |          |               |         |         |
| 744 | <i>Emc10</i>         | <i>ns</i>      | <i>ns</i> | <i>ns</i> | 1.31      |                 |         |          |               |         |         |
| 745 | <i>Ifitm3</i>        | <i>ns</i>      | <i>ns</i> | <i>ns</i> | 1.312     |                 |         |          |               |         |         |
| 746 | <i>Tgfb1</i>         | <i>ns</i>      | <i>ns</i> | <i>ns</i> | 1.324     |                 |         |          |               |         |         |
| 747 | <i>Ddost</i>         | <i>ns</i>      | <i>ns</i> | <i>ns</i> | 1.333     |                 |         |          |               |         |         |
| 748 | <i>Adam8</i>         | <i>ns</i>      | <i>ns</i> | <i>ns</i> | 1.333     |                 |         |          |               |         |         |
| 749 | <i>Ifitm2</i>        | <i>ns</i>      | <i>ns</i> | <i>ns</i> | 1.334     |                 |         |          |               |         |         |
| 750 | <i>Phgdh</i>         | <i>ns</i>      | <i>ns</i> | <i>ns</i> | 1.354     |                 |         |          |               |         |         |
| 751 | <i>Tssc1</i>         | <i>ns</i>      | <i>ns</i> | <i>ns</i> | 1.408     |                 |         |          |               |         |         |
| 752 | <i>Id1</i>           | <i>ns</i>      | <i>ns</i> | <i>ns</i> | 1.422     |                 |         |          |               |         |         |
| 753 | <i>Pycard</i>        | <i>ns</i>      | <i>ns</i> | <i>ns</i> | 1.489     |                 |         |          |               |         |         |
| 754 | <i>Clec10a*</i>      | <i>ns</i>      | <i>ns</i> | <i>ns</i> | 1.498     | -0.665          |         |          |               |         |         |
| 755 | <i>Lgals3</i>        | <i>ns</i>      | <i>ns</i> | <i>ns</i> | 1.545     |                 |         |          |               |         |         |
| 756 | <i>Sertad1</i>       | <i>ns</i>      | <i>ns</i> | <i>ns</i> | 1.634     |                 |         |          |               |         |         |
| 757 | <i>Tspo</i>          | <i>ns</i>      | <i>ns</i> | <i>ns</i> | 1.787     |                 |         |          |               |         |         |
| 758 | <i>Dapl1</i>         | <i>ns</i>      | <i>ns</i> | <i>ns</i> | 2.358     |                 |         |          |               |         |         |
| 759 | <i>H2-DMb2</i>       | <i>ns</i>      | <i>ns</i> | <i>ns</i> | 2.622     |                 |         |          |               |         |         |
| 760 | <i>Myl3</i>          | <i>ns</i>      | -1.605    | -1.436    | <i>ns</i> |                 |         |          |               |         |         |

| No. | Gene Name            | TC-whole joint |        |         |          | DMM-whole joint |         |          | DMM-cartilage |         |         |
|-----|----------------------|----------------|--------|---------|----------|-----------------|---------|----------|---------------|---------|---------|
|     |                      | 1 Day          | 1 Week | 6 Weeks | 12 Weeks | 2 Weeks         | 4 Weeks | 16 Weeks | 1 Week        | 2 Weeks | 6 Weeks |
| 761 | <i>Vwa1</i>          | ns             | 0.863  | -1.368  | ns       |                 |         |          | 1.322         |         |         |
| 762 | <i>Bdh1</i>          | ns             | -1.298 | -1.359  | ns       |                 |         |          |               |         |         |
| 763 | <i>Tnnt1</i>         | ns             | -1.254 | -1.032  | ns       |                 |         |          |               |         |         |
| 764 | <i>Tnnc1</i>         | ns             | -1.574 | -1.031  | ns       |                 |         |          |               |         |         |
| 765 | <i>Tnni1</i>         | ns             | -1.742 | -1.01   | ns       |                 |         |          |               |         |         |
| 766 | <i>Fndc5</i>         | ns             | -0.892 | -1.009  | ns       |                 |         |          |               |         |         |
| 767 | <i>Egln3</i>         | ns             | -0.8   | -0.934  | ns       |                 |         |          |               |         |         |
| 768 | <i>Adprhl1</i>       | ns             | -0.586 | -0.904  | ns       |                 |         |          | -0.689        |         |         |
| 769 | <i>Myh7</i>          | ns             | -1.674 | -0.899  | ns       |                 |         |          |               |         |         |
| 770 | <i>Coq10a</i>        | ns             | -0.956 | -0.897  | ns       |                 |         |          |               |         |         |
| 771 | <i>Mreg</i>          | ns             | -0.913 | -0.865  | ns       |                 |         |          |               |         |         |
| 772 | <i>Ankrd2</i>        | ns             | -1.579 | -0.856  | ns       |                 |         |          |               |         |         |
| 773 | <i>Myoz2</i>         | ns             | -1.711 | -0.804  | ns       |                 |         |          |               |         |         |
| 774 | <i>Ldhb</i>          | ns             | -0.959 | -0.783  | ns       | -0.617          |         |          | -0.895        |         |         |
| 775 | <i>Cox7a1</i>        | ns             | -0.809 | -0.778  | ns       |                 |         |          |               |         |         |
| 776 | <i>Vgll2</i>         | ns             | -1.229 | -0.7    | ns       |                 |         |          |               |         |         |
| 777 | <i>Atp5g1</i>        | ns             | -0.669 | -0.653  | ns       |                 |         |          |               |         |         |
| 778 | <i>Fabp3</i>         | ns             | -0.89  | -0.648  | ns       |                 |         |          |               |         |         |
| 779 | <i>Pkd2</i>          | ns             | 1.222  | 0.644   | ns       | 0.922           | 1.139   |          | 0.681         |         |         |
| 780 | <i>Bmp1</i>          | ns             | 0.763  | 0.67    | ns       |                 | 0.732   |          |               |         |         |
| 781 | <i>Nov</i>           | ns             | 1.09   | 0.733   | ns       |                 | 0.996   |          | 1.886         | 2.742   | 2.587   |
| 782 | <i>Fibin</i>         | ns             | 0.804  | 0.761   | ns       |                 | 1.021   |          |               |         |         |
| 783 | <i>C1s1</i>          | ns             | 0.839  | 0.809   | ns       |                 |         |          |               |         |         |
| 784 | <i>Islr</i>          | ns             | 0.699  | 0.825   | ns       | 0.701           | 1.045   |          |               |         |         |
| 785 | <i>Sh3d19</i>        | ns             | 0.82   | 0.839   | ns       | 0.603           | 0.836   |          | 1.215         |         |         |
| 786 | <i>Gfpt2</i>         | ns             | 0.77   | 0.866   | ns       |                 | 0.735   |          | 1.107         |         |         |
| 787 | <i>Plxdc2</i>        | ns             | 0.782  | 0.925   | ns       |                 | 0.626   |          |               |         |         |
| 788 | <i>Col15a1</i>       | ns             | 1.182  | 0.942   | ns       | 1.006           | 1.174   |          |               |         |         |
| 789 | <i>Mrc2</i>          | ns             | 0.999  | 0.959   | ns       |                 | 0.887   |          |               |         |         |
| 790 | <i>Trps1</i>         | ns             | 0.957  | 0.966   | ns       | 0.943           | 0.813   |          |               |         |         |
| 791 | <i>Pls3</i>          | ns             | 0.651  | 0.976   | ns       |                 | 0.713   |          |               |         |         |
| 792 | <i>Dcn</i>           | ns             | 0.676  | 1.023   | ns       |                 | 1.018   |          | 4.799         | 1.347   |         |
| 793 | <i>Mmp14</i>         | ns             | 1.287  | 1.026   | ns       | 0.727           | 1.110   |          |               |         |         |
| 794 | <i>Lrrn4cl</i>       | ns             | 1.029  | 1.027   | ns       |                 | 1.098   |          |               |         |         |
| 795 | <i>Pdgfra</i>        | ns             | 1.641  | 1.057   | ns       | 0.722           | 0.758   |          | 0.854         | 2.095   |         |
| 796 | <i>Col12a1</i>       | ns             | 1.428  | 1.059   | ns       | 1.287           | 1.501   | 1.160    |               |         |         |
| 797 | <i>Cdon</i>          | ns             | 1.317  | 1.125   | ns       |                 | 0.935   | 0.790    |               |         |         |
| 798 | <i>Gem</i>           | ns             | 1.4    | 1.139   | ns       | 1.102           | 1.306   |          |               |         |         |
| 799 | <i>Edil3</i>         | ns             | 1.038  | 1.202   | ns       | 1.225           | 1.368   | 1.073    |               |         |         |
| 800 | <i>Ssc5d</i>         | ns             | 2.256  | 1.229   | ns       |                 |         |          |               |         |         |
| 801 | <i>Egfr</i>          | ns             | 1.253  | 1.237   | ns       | 0.711           | 0.973   |          | 0.859         |         |         |
| 802 | <i>Sbsn</i>          | ns             | 1.725  | 1.331   | ns       |                 | 0.975   | 1.124    | 1.317         |         |         |
| 803 | <i>Plod2</i>         | ns             | 1.305  | 1.34    | ns       | 0.873           | 1.133   |          | 1.316         |         |         |
| 804 | <i>Sfrp4</i>         | ns             | 0.692  | 1.342   | ns       | 0.707           | 0.802   | 0.657    |               |         | 0.934   |
| 805 | <i>Tmem119</i>       | ns             | 0.628  | 1.351   | ns       |                 | 0.713   |          |               |         |         |
| 806 | <i>Fkbp7</i>         | ns             | 0.912  | 1.353   | ns       |                 | 1.067   |          | 1.532         |         |         |
| 807 | <i>Cd109</i>         | ns             | 0.732  | 1.363   | ns       |                 | 0.601   |          | 0.858         |         |         |
| 808 | <i>Spon1</i>         | ns             | 0.829  | 1.407   | ns       | 0.921           | 1.050   |          |               |         |         |
| 809 | <i>Prelp</i>         | ns             | 1.106  | 1.44    | ns       |                 | 0.829   | 1.160    | 1.143         |         |         |
| 810 | <i>Matn2</i>         | ns             | 1.998  | 1.489   | ns       | 1.613           | 1.802   | 1.550    |               |         |         |
| 811 | <i>Acan</i>          | ns             | 1.306  | 1.505   | ns       |                 |         |          |               |         |         |
| 812 | <i>Sdc2</i>          | ns             | 0.812  | 1.755   | ns       |                 | 0.621   |          | 0.869         |         |         |
| 813 | <i>Lum</i>           | ns             | 1.428  | 2.203   | ns       | 0.872           | 1.389   | 1.509    | 2.566         | 2.861   |         |
| 814 | <i>Abi3bp</i>        | ns             | 1.264  | 2.207   | ns       | 0.966           | 1.202   | 0.995    |               |         |         |
| 815 | <i>Prelid2</i>       | ns             | ns     | -3.671  | ns       |                 |         |          |               |         |         |
| 816 | <i>Tmem203</i>       | ns             | ns     | -2.117  | ns       |                 |         |          |               |         |         |
| 817 | <i>Zdhhc23</i>       | ns             | ns     | -2.033  | ns       |                 |         |          |               |         |         |
| 818 | <i>Ctf1</i>          | ns             | ns     | -1.838  | ns       |                 |         |          |               |         |         |
| 819 | <i>Tmem160</i>       | ns             | ns     | -1.787  | ns       |                 |         |          |               |         |         |
| 820 | <i>Cebpb</i>         | ns             | ns     | -1.761  | ns       |                 |         |          |               |         |         |
| 821 | <i>0610040B10Rik</i> | ns             | ns     | -1.647  | ns       |                 |         |          |               |         |         |
| 822 | <i>Mir690</i>        | ns             | ns     | -1.613  | ns       |                 |         |          |               |         |         |
| 823 | <i>Atp2a2</i>        | ns             | ns     | -1.604  | ns       |                 |         |          |               |         |         |
| 824 | <i>Hsbp1l1</i>       | ns             | ns     | -1.509  | ns       |                 |         |          |               |         |         |

| No. | Gene Name            | TC-whole joint |           |         |           | DMM-whole joint |         |          | DMM-cartilage |         |         |
|-----|----------------------|----------------|-----------|---------|-----------|-----------------|---------|----------|---------------|---------|---------|
|     |                      | 1 Day          | 1 Week    | 6 Weeks | 12 Weeks  | 2 Weeks         | 4 Weeks | 16 Weeks | 1 Week        | 2 Weeks | 6 Weeks |
| 825 | <i>Hist2h4</i>       | <i>ns</i>      | <i>ns</i> | -1.478  | <i>ns</i> |                 |         |          |               |         |         |
| 826 | <i>Rpl22l1</i>       | <i>ns</i>      | <i>ns</i> | -1.442  | <i>ns</i> |                 |         |          |               |         |         |
| 827 | <i>Clec2d</i>        | <i>ns</i>      | <i>ns</i> | -1.44   | <i>ns</i> |                 |         |          |               |         |         |
| 828 | <i>Mylpf</i>         | <i>ns</i>      | <i>ns</i> | -1.435  | <i>ns</i> |                 |         |          |               |         |         |
| 829 | <i>Cox7c</i>         | <i>ns</i>      | <i>ns</i> | -1.376  | <i>ns</i> |                 |         |          |               |         |         |
| 830 | <i>Timm8b</i>        | <i>ns</i>      | <i>ns</i> | -1.364  | <i>ns</i> |                 |         |          |               |         |         |
| 831 | <i>Mocs3</i>         | <i>ns</i>      | <i>ns</i> | -1.35   | <i>ns</i> |                 |         |          |               |         |         |
| 832 | <i>Gm7120</i>        | <i>ns</i>      | <i>ns</i> | -1.329  | <i>ns</i> |                 |         |          |               |         |         |
| 833 | <i>Tmem223</i>       | <i>ns</i>      | <i>ns</i> | -1.272  | <i>ns</i> |                 |         |          |               |         |         |
| 834 | <i>Malsu1</i>        | <i>ns</i>      | <i>ns</i> | -1.263  | <i>ns</i> |                 |         |          |               |         |         |
| 835 | <i>Chchd2</i>        | <i>ns</i>      | <i>ns</i> | -1.26   | <i>ns</i> |                 |         |          |               |         |         |
| 836 | <i>Mcat</i>          | <i>ns</i>      | <i>ns</i> | -1.234  | <i>ns</i> |                 |         |          |               |         |         |
| 837 | <i>Klhl21</i>        | <i>ns</i>      | <i>ns</i> | -1.191  | <i>ns</i> |                 |         |          |               |         |         |
| 838 | <i>Cpeb1</i>         | <i>ns</i>      | <i>ns</i> | -1.183  | <i>ns</i> |                 |         |          |               |         |         |
| 839 | <i>Mettl23</i>       | <i>ns</i>      | <i>ns</i> | -1.162  | <i>ns</i> |                 |         |          |               |         |         |
| 840 | <i>Snrpg</i>         | <i>ns</i>      | <i>ns</i> | -1.15   | <i>ns</i> |                 |         |          |               |         |         |
| 841 | <i>Eif3f</i>         | <i>ns</i>      | <i>ns</i> | -1.137  | <i>ns</i> |                 |         |          |               |         |         |
| 842 | <i>Fxyd1</i>         | <i>ns</i>      | <i>ns</i> | -1.132  | <i>ns</i> |                 |         |          |               |         |         |
| 843 | <i>Atp5g2</i>        | <i>ns</i>      | <i>ns</i> | -1.132  | <i>ns</i> |                 |         |          |               |         |         |
| 844 | <i>Pfn2</i>          | <i>ns</i>      | <i>ns</i> | -1.128  | <i>ns</i> |                 |         |          |               |         |         |
| 845 | <i>Tcap</i>          | <i>ns</i>      | <i>ns</i> | -1.117  | <i>ns</i> |                 |         |          |               |         |         |
| 846 | <i>Scand1</i>        | <i>ns</i>      | <i>ns</i> | -1.114  | <i>ns</i> |                 |         |          |               |         |         |
| 847 | <i>Mtg2</i>          | <i>ns</i>      | <i>ns</i> | -1.106  | <i>ns</i> |                 |         |          |               |         |         |
| 848 | <i>Cacng7</i>        | <i>ns</i>      | <i>ns</i> | -1.064  | <i>ns</i> |                 |         |          |               |         |         |
| 849 | <i>Fopnl</i>         | <i>ns</i>      | <i>ns</i> | -1.058  | <i>ns</i> |                 |         |          |               |         |         |
| 850 | <i>BC018473</i>      | <i>ns</i>      | <i>ns</i> | -1.04   | <i>ns</i> |                 |         |          |               |         |         |
| 851 | <i>Sobp</i>          | <i>ns</i>      | <i>ns</i> | -1.04   | <i>ns</i> |                 |         |          |               |         |         |
| 852 | <i>Cox5a</i>         | <i>ns</i>      | <i>ns</i> | -1.033  | <i>ns</i> |                 |         |          |               |         |         |
| 853 | <i>Sdhb</i>          | <i>ns</i>      | <i>ns</i> | -1.028  | <i>ns</i> |                 |         |          |               |         |         |
| 854 | <i>Cln6</i>          | <i>ns</i>      | <i>ns</i> | -1.007  | <i>ns</i> |                 |         |          |               |         |         |
| 855 | <i>Dexi</i>          | <i>ns</i>      | <i>ns</i> | -1.004  | <i>ns</i> |                 |         |          |               |         |         |
| 856 | <i>Atp5e</i>         | <i>ns</i>      | <i>ns</i> | -0.999  | <i>ns</i> |                 |         |          |               |         | -1.062  |
| 857 | <i>Bri3</i>          | <i>ns</i>      | <i>ns</i> | -0.981  | <i>ns</i> |                 |         |          |               |         |         |
| 858 | <i>Lars2</i>         | <i>ns</i>      | <i>ns</i> | -0.976  | <i>ns</i> |                 |         |          |               |         |         |
| 859 | <i>Uqcr10</i>        | <i>ns</i>      | <i>ns</i> | -0.973  | <i>ns</i> |                 |         |          |               |         |         |
| 860 | <i>Klhl30</i>        | <i>ns</i>      | <i>ns</i> | -0.957  | <i>ns</i> |                 |         |          |               |         |         |
| 861 | <i>Mcts1</i>         | <i>ns</i>      | <i>ns</i> | -0.955  | <i>ns</i> |                 |         |          |               |         |         |
| 862 | <i>Sema6c</i>        | <i>ns</i>      | <i>ns</i> | -0.943  | <i>ns</i> |                 |         |          |               |         |         |
| 863 | <i>Ppif</i>          | <i>ns</i>      | <i>ns</i> | -0.936  | <i>ns</i> |                 |         |          |               |         |         |
| 864 | <i>Pla2g12a</i>      | <i>ns</i>      | <i>ns</i> | -0.934  | <i>ns</i> |                 |         |          |               |         |         |
| 865 | <i>Gyg</i>           | <i>ns</i>      | <i>ns</i> | -0.93   | <i>ns</i> |                 |         |          |               |         |         |
| 866 | <i>Gm4980</i>        | <i>ns</i>      | <i>ns</i> | -0.924  | <i>ns</i> |                 |         |          |               |         |         |
| 867 | <i>Plekhb1</i>       | <i>ns</i>      | <i>ns</i> | -0.922  | <i>ns</i> |                 |         |          |               |         |         |
| 868 | <i>Mgst3</i>         | <i>ns</i>      | <i>ns</i> | -0.917  | <i>ns</i> |                 |         |          |               |         |         |
| 869 | <i>Sepw1</i>         | <i>ns</i>      | <i>ns</i> | -0.895  | <i>ns</i> |                 |         |          |               |         |         |
| 870 | <i>Otud1</i>         | <i>ns</i>      | <i>ns</i> | -0.895  | <i>ns</i> |                 |         |          |               |         |         |
| 871 | <i>Hs3st5</i>        | <i>ns</i>      | <i>ns</i> | -0.894  | <i>ns</i> |                 |         |          |               |         |         |
| 872 | <i>Cox6b1</i>        | <i>ns</i>      | <i>ns</i> | -0.885  | <i>ns</i> |                 |         |          |               |         |         |
| 873 | <i>Fdx1</i>          | <i>ns</i>      | <i>ns</i> | -0.884  | <i>ns</i> |                 |         |          |               |         |         |
| 874 | <i>Mettl20</i>       | <i>ns</i>      | <i>ns</i> | -0.873  | <i>ns</i> |                 |         |          |               |         |         |
| 875 | <i>2610035D17Rik</i> | <i>ns</i>      | <i>ns</i> | -0.87   | <i>ns</i> |                 |         |          |               |         |         |
| 876 | <i>Mrpl44</i>        | <i>ns</i>      | <i>ns</i> | -0.839  | <i>ns</i> |                 |         |          |               |         |         |
| 877 | <i>Cfl2</i>          | <i>ns</i>      | <i>ns</i> | -0.837  | <i>ns</i> |                 |         |          |               |         |         |
| 878 | <i>N6amt2</i>        | <i>ns</i>      | <i>ns</i> | -0.835  | <i>ns</i> |                 |         |          |               |         |         |
| 879 | <i>Bcat2</i>         | <i>ns</i>      | <i>ns</i> | -0.834  | <i>ns</i> |                 |         |          |               |         | -0.986  |
| 880 | <i>Eif1b</i>         | <i>ns</i>      | <i>ns</i> | -0.825  | <i>ns</i> |                 |         |          |               |         |         |
| 881 | <i>Tst</i>           | <i>ns</i>      | <i>ns</i> | -0.823  | <i>ns</i> |                 |         |          |               |         |         |
| 882 | <i>Ndufb8</i>        | <i>ns</i>      | <i>ns</i> | -0.82   | <i>ns</i> |                 |         |          |               |         |         |
| 883 | <i>Atp5g3</i>        | <i>ns</i>      | <i>ns</i> | -0.814  | <i>ns</i> |                 |         |          |               |         |         |
| 884 | <i>Saysd1</i>        | <i>ns</i>      | <i>ns</i> | -0.811  | <i>ns</i> |                 |         |          |               |         |         |
| 885 | <i>Plekhb2</i>       | <i>ns</i>      | <i>ns</i> | -0.809  | <i>ns</i> |                 |         |          |               |         |         |
| 886 | <i>Thnsl2</i>        | <i>ns</i>      | <i>ns</i> | -0.799  | <i>ns</i> |                 |         |          |               |         |         |
| 887 | <i>Siah1a</i>        | <i>ns</i>      | <i>ns</i> | -0.796  | <i>ns</i> |                 |         |          |               |         |         |
| 888 | <i>Cox8b</i>         | <i>ns</i>      | <i>ns</i> | -0.788  | <i>ns</i> |                 |         |          |               |         |         |

| No. | Gene Name            | TC-whole joint |        |         |          | DMM-whole joint |         |          | DMM-cartilage |         |         |
|-----|----------------------|----------------|--------|---------|----------|-----------------|---------|----------|---------------|---------|---------|
|     |                      | 1 Day          | 1 Week | 6 Weeks | 12 Weeks | 2 Weeks         | 4 Weeks | 16 Weeks | 1 Week        | 2 Weeks | 6 Weeks |
| 889 | <i>Fzd9</i>          | ns             | ns     | -0.785  | ns       |                 |         |          |               |         |         |
| 890 | <i>Map1lc3a</i>      | ns             | ns     | -0.783  | ns       |                 |         |          |               |         |         |
| 891 | <i>2810428I15Rik</i> | ns             | ns     | -0.782  | ns       |                 |         |          |               |         |         |
| 892 | <i>Samm50</i>        | ns             | ns     | -0.782  | ns       |                 |         |          |               |         |         |
| 893 | <i>Dusp18*</i>       | ns             | ns     | -0.774  | ns       | 0.967           | 1.140   |          |               |         |         |
| 894 | <i>Gpt</i>           | ns             | ns     | -0.768  | ns       |                 |         |          |               |         |         |
| 895 | <i>Yars2</i>         | ns             | ns     | -0.727  | ns       |                 |         |          |               |         |         |
| 896 | <i>Ldha</i>          | ns             | ns     | -0.726  | ns       |                 |         |          |               |         |         |
| 897 | <i>Ndufa1</i>        | ns             | ns     | -0.718  | ns       |                 |         |          |               |         |         |
| 898 | <i>Atp5j2</i>        | ns             | ns     | -0.716  | ns       |                 |         |          |               |         |         |
| 899 | <i>Metrn</i>         | ns             | ns     | -0.698  | ns       |                 |         |          |               |         |         |
| 900 | <i>Tmem126a</i>      | ns             | ns     | -0.698  | ns       |                 |         |          |               |         |         |
| 901 | <i>Bcam</i>          | ns             | ns     | -0.695  | ns       |                 |         |          |               |         |         |
| 902 | <i>Hspb8</i>         | ns             | ns     | -0.692  | ns       |                 |         |          |               |         |         |
| 903 | <i>Pdgfa*</i>        | ns             | ns     | -0.69   | ns       |                 | 0.642   |          |               |         |         |
| 904 | <i>Ech1</i>          | ns             | ns     | -0.686  | ns       |                 |         |          |               |         |         |
| 905 | <i>Ppara</i>         | ns             | ns     | -0.685  | ns       |                 |         |          |               |         |         |
| 906 | <i>Rangrf</i>        | ns             | ns     | -0.68   | ns       |                 |         |          |               |         |         |
| 907 | <i>Mcee</i>          | ns             | ns     | -0.68   | ns       |                 |         |          |               |         |         |
| 908 | <i>Rapsn</i>         | ns             | ns     | -0.677  | ns       |                 |         |          |               |         |         |
| 909 | <i>Twf2</i>          | ns             | ns     | -0.67   | ns       |                 |         |          |               |         |         |
| 910 | <i>Phpt1</i>         | ns             | ns     | -0.66   | ns       |                 |         |          |               |         |         |
| 911 | <i>Neurl1a</i>       | ns             | ns     | -0.657  | ns       |                 |         |          |               |         |         |
| 912 | <i>St3gal3</i>       | ns             | ns     | -0.655  | ns       |                 |         |          |               |         |         |
| 913 | <i>Fam131b</i>       | ns             | ns     | -0.649  | ns       |                 |         |          |               |         |         |
| 914 | <i>Ndufb3</i>        | ns             | ns     | -0.64   | ns       |                 |         |          |               |         |         |
| 915 | <i>Coq3</i>          | ns             | ns     | -0.638  | ns       |                 |         |          |               |         |         |
| 916 | <i>Casq2</i>         | ns             | ns     | -0.633  | ns       |                 |         |          |               |         |         |
| 917 | <i>Dusp13</i>        | ns             | ns     | -0.624  | ns       |                 |         |          |               |         |         |
| 918 | <i>Ndufa2</i>        | ns             | ns     | -0.617  | ns       |                 |         |          |               |         |         |
| 919 | <i>2610306M01Rik</i> | ns             | ns     | -0.616  | ns       |                 |         |          |               |         |         |
| 920 | <i>Acadvl</i>        | ns             | ns     | -0.604  | ns       |                 |         |          |               |         |         |
| 921 | <i>Clip4*</i>        | ns             | ns     | -0.597  | ns       | 1.005           | 0.991   | 1.040    |               |         |         |
| 922 | <i>Popdc2</i>        | ns             | ns     | -0.595  | ns       |                 |         |          |               |         |         |
| 923 | <i>Npepl1</i>        | ns             | ns     | -0.592  | ns       |                 |         |          |               | -1.328  |         |
| 924 | <i>Mrpl4</i>         | ns             | ns     | -0.591  | ns       |                 |         |          |               |         |         |
| 925 | <i>Bckdha</i>        | ns             | ns     | -0.581  | ns       |                 |         |          |               |         |         |
| 926 | <i>Col1a2</i>        | ns             | ns     | 0.599   | ns       |                 | 1.040   |          |               |         |         |
| 927 | <i>Wdr76</i>         | ns             | ns     | 0.601   | ns       |                 |         |          |               |         |         |
| 928 | <i>Hnrnpa1</i>       | ns             | ns     | 0.602   | ns       |                 |         |          |               |         |         |
| 929 | <i>Pth1r</i>         | ns             | ns     | 0.619   | ns       |                 |         |          |               |         |         |
| 930 | <i>Slc37a2</i>       | ns             | ns     | 0.627   | ns       |                 |         |          |               |         |         |
| 931 | <i>Tbc1d23</i>       | ns             | ns     | 0.649   | ns       |                 |         |          |               |         |         |
| 932 | <i>Gpr65</i>         | ns             | ns     | 0.652   | ns       |                 |         |          |               |         |         |
| 933 | <i>Rnase6</i>        | ns             | ns     | 0.679   | ns       |                 |         |          |               |         |         |
| 934 | <i>Acpp</i>          | ns             | ns     | 0.694   | ns       |                 |         |          |               |         |         |
| 935 | <i>Alpl</i>          | ns             | ns     | 0.701   | ns       |                 |         |          |               |         |         |
| 936 | <i>Strn</i>          | ns             | ns     | 0.714   | ns       |                 |         |          |               | 1.081   |         |
| 937 | <i>Zwilch</i>        | ns             | ns     | 0.72    | ns       |                 |         |          |               |         |         |
| 938 | <i>Mepe</i>          | ns             | ns     | 0.725   | ns       |                 |         |          |               |         |         |
| 939 | <i>Atp11b</i>        | ns             | ns     | 0.726   | ns       |                 |         |          |               |         |         |
| 940 | <i>Cp</i>            | ns             | ns     | 0.731   | ns       |                 |         |          |               |         |         |
| 941 | <i>Cdc40</i>         | ns             | ns     | 0.737   | ns       |                 |         |          |               |         |         |
| 942 | <i>Tnfrsf13c</i>     | ns             | ns     | 0.738   | ns       |                 |         |          |               |         |         |
| 943 | <i>Fbxo11</i>        | ns             | ns     | 0.738   | ns       |                 |         |          |               |         |         |
| 944 | <i>Adamts2</i>       | ns             | ns     | 0.745   | ns       |                 | 0.941   |          |               |         |         |
| 945 | <i>Vangl1</i>        | ns             | ns     | 0.761   | ns       |                 |         |          |               |         |         |
| 946 | <i>Col11a2</i>       | ns             | ns     | 0.764   | ns       |                 |         |          |               |         |         |
| 947 | <i>Brip1</i>         | ns             | ns     | 0.764   | ns       |                 |         |          |               |         |         |
| 948 | <i>Serpinf1</i>      | ns             | ns     | 0.771   | ns       |                 | 0.771   |          |               |         |         |
| 949 | <i>Cyp1b1</i>        | ns             | ns     | 0.775   | ns       |                 |         |          |               |         |         |
| 950 | <i>Brca2</i>         | ns             | ns     | 0.777   | ns       |                 |         |          |               |         |         |
| 951 | <i>Usp32</i>         | ns             | ns     | 0.779   | ns       |                 |         |          |               |         |         |
| 952 | <i>Ctsk</i>          | ns             | ns     | 0.781   | ns       |                 |         |          |               |         |         |

| No.  | Gene Name       | TC-whole joint |        |         |          | DMM-whole joint |         |          | DMM-cartilage |         |         |
|------|-----------------|----------------|--------|---------|----------|-----------------|---------|----------|---------------|---------|---------|
|      |                 | 1 Day          | 1 Week | 6 Weeks | 12 Weeks | 2 Weeks         | 4 Weeks | 16 Weeks | 1 Week        | 2 Weeks | 6 Weeks |
| 953  | <i>Lin9</i>     | ns             | ns     | 0.785   | ns       |                 |         |          |               |         |         |
| 954  | <i>Mb21d1</i>   | ns             | ns     | 0.787   | ns       |                 |         |          |               |         |         |
| 955  | <i>Casp8</i>    | ns             | ns     | 0.788   | ns       |                 |         |          |               |         |         |
| 956  | <i>Supt16</i>   | ns             | ns     | 0.79    | ns       |                 |         |          |               |         |         |
| 957  | <i>Col1a1</i>   | ns             | ns     | 0.814   | ns       |                 | 0.778   |          |               |         |         |
| 958  | <i>Ddr2</i>     | ns             | ns     | 0.816   | ns       |                 | 0.625   |          |               | 0.994   |         |
| 959  | <i>Creb3l1</i>  | ns             | ns     | 0.817   | ns       |                 | 0.637   |          |               |         |         |
| 960  | <i>Ypel4</i>    | ns             | ns     | 0.858   | ns       |                 |         |          |               |         |         |
| 961  | <i>Tmem154</i>  | ns             | ns     | 0.859   | ns       |                 |         |          |               |         |         |
| 962  | <i>Cdh2</i>     | ns             | ns     | 0.869   | ns       |                 |         |          |               |         |         |
| 963  | <i>Mbd4</i>     | ns             | ns     | 0.871   | ns       |                 |         |          |               |         |         |
| 964  | <i>Zfp189</i>   | ns             | ns     | 0.879   | ns       |                 |         |          |               |         |         |
| 965  | <i>Dapp1</i>    | ns             | ns     | 0.886   | ns       |                 |         |          |               |         |         |
| 966  | <i>BC027231</i> | ns             | ns     | 0.89    | ns       |                 |         |          |               |         |         |
| 967  | <i>Zfp780b</i>  | ns             | ns     | 0.892   | ns       |                 |         |          |               |         |         |
| 968  | <i>Mrc1</i>     | ns             | ns     | 0.894   | ns       |                 |         |          |               |         |         |
| 969  | <i>Snx22</i>    | ns             | ns     | 0.899   | ns       |                 |         |          |               |         |         |
| 970  | <i>Zfp451</i>   | ns             | ns     | 0.9     | ns       |                 |         |          |               | 1.060   |         |
| 971  | <i>Bbx</i>      | ns             | ns     | 0.901   | ns       |                 |         |          |               |         |         |
| 972  | <i>Rbmx2</i>    | ns             | ns     | 0.901   | ns       |                 |         |          |               |         |         |
| 973  | <i>Zdhhc20</i>  | ns             | ns     | 0.904   | ns       |                 | 0.594   |          |               |         |         |
| 974  | <i>Sgms2</i>    | ns             | ns     | 0.905   | ns       |                 |         |          |               |         |         |
| 975  | <i>Smpd3</i>    | ns             | ns     | 0.921   | ns       |                 |         |          |               |         |         |
| 976  | <i>Kif4</i>     | ns             | ns     | 0.924   | ns       |                 |         |          |               |         |         |
| 977  | <i>Col9a2</i>   | ns             | ns     | 0.924   | ns       |                 |         |          |               |         |         |
| 978  | <i>Gabbr1</i>   | ns             | ns     | 0.925   | ns       |                 |         |          |               |         |         |
| 979  | <i>Chd1</i>     | ns             | ns     | 0.928   | ns       |                 |         |          |               |         |         |
| 980  | <i>Far1</i>     | ns             | ns     | 0.932   | ns       |                 |         |          |               |         |         |
| 981  | <i>Siglecg</i>  | ns             | ns     | 0.932   | ns       |                 |         |          |               |         |         |
| 982  | <i>Epb4.1l5</i> | ns             | ns     | 0.933   | ns       |                 |         |          |               |         |         |
| 983  | <i>AI504432</i> | ns             | ns     | 0.942   | ns       |                 |         |          |               |         |         |
| 984  | <i>Diap3</i>    | ns             | ns     | 0.944   | ns       |                 |         |          |               |         |         |
| 985  | <i>Phf3</i>     | ns             | ns     | 0.944   | ns       |                 |         |          |               |         |         |
| 986  | <i>Adam10</i>   | ns             | ns     | 0.948   | ns       |                 |         |          |               |         |         |
| 987  | <i>Btla</i>     | ns             | ns     | 0.96    | ns       |                 |         |          |               |         |         |
| 988  | <i>Fgl2</i>     | ns             | ns     | 0.962   | ns       |                 |         |          |               |         |         |
| 989  | <i>Nipbl</i>    | ns             | ns     | 0.969   | ns       |                 |         |          |               |         |         |
| 990  | <i>Calhm2</i>   | ns             | ns     | 0.972   | ns       |                 |         |          |               |         |         |
| 991  | <i>Pkhd1l1</i>  | ns             | ns     | 0.972   | ns       |                 |         |          |               |         |         |
| 992  | <i>Tlr4</i>     | ns             | ns     | 0.973   | ns       |                 |         |          |               | 0.836   |         |
| 993  | <i>Ptprd*</i>   | ns             | ns     | 0.973   | ns       |                 | -0.932  |          |               |         |         |
| 994  | <i>Itih5</i>    | ns             | ns     | 0.976   | ns       |                 |         |          |               |         |         |
| 995  | <i>Nin</i>      | ns             | ns     | 0.981   | ns       |                 |         |          |               |         |         |
| 996  | <i>Hsp90b1</i>  | ns             | ns     | 0.982   | ns       |                 |         |          |               |         |         |
| 997  | <i>Sec62</i>    | ns             | ns     | 0.988   | ns       |                 |         |          |               |         |         |
| 998  | <i>Dmkn</i>     | ns             | ns     | 0.988   | ns       |                 |         |          |               |         |         |
| 999  | <i>Bglap</i>    | ns             | ns     | 0.989   | ns       |                 |         |          |               |         |         |
| 1000 | <i>Polq</i>     | ns             | ns     | 0.994   | ns       |                 |         |          |               |         |         |
| 1001 | <i>Pls1</i>     | ns             | ns     | 0.995   | ns       |                 |         |          |               |         |         |
| 1002 | <i>Cnpy4</i>    | ns             | ns     | 1.003   | ns       |                 |         |          |               |         |         |
| 1003 | <i>Fam76b</i>   | ns             | ns     | 1.007   | ns       |                 |         |          |               |         |         |
| 1004 | <i>Mdm4</i>     | ns             | ns     | 1.014   | ns       |                 |         |          |               |         |         |
| 1005 | <i>Rab44</i>    | ns             | ns     | 1.016   | ns       |                 |         |          |               |         |         |
| 1006 | <i>Vipas39</i>  | ns             | ns     | 1.018   | ns       |                 |         |          |               |         |         |
| 1007 | <i>Cstf3</i>    | ns             | ns     | 1.022   | ns       |                 |         |          |               |         |         |
| 1008 | <i>Smchd1</i>   | ns             | ns     | 1.024   | ns       |                 |         |          |               |         |         |
| 1009 | <i>Atad5</i>    | ns             | ns     | 1.038   | ns       |                 |         |          |               |         |         |
| 1010 | <i>Rel</i>      | ns             | ns     | 1.045   | ns       |                 |         |          |               |         |         |
| 1011 | <i>Suco</i>     | ns             | ns     | 1.046   | ns       |                 |         |          |               |         |         |
| 1012 | <i>Col9a3</i>   | ns             | ns     | 1.05    | ns       |                 |         |          |               |         |         |
| 1013 | <i>Fam45a</i>   | ns             | ns     | 1.052   | ns       |                 |         |          |               |         |         |
| 1014 | <i>Twf1</i>     | ns             | ns     | 1.053   | ns       |                 | 0.590   |          |               |         |         |
| 1015 | <i>Zfp65</i>    | ns             | ns     | 1.056   | ns       |                 |         |          |               |         |         |
| 1016 | <i>Sema3a</i>   | ns             | ns     | 1.058   | ns       |                 | 0.635   |          |               |         |         |



| No.  | Gene Name        | TC-whole joint |        |         |          | DMM-whole joint |         |          | DMM-cartilage |         |         |
|------|------------------|----------------|--------|---------|----------|-----------------|---------|----------|---------------|---------|---------|
|      |                  | 1 Day          | 1 Week | 6 Weeks | 12 Weeks | 2 Weeks         | 4 Weeks | 16 Weeks | 1 Week        | 2 Weeks | 6 Weeks |
| 1017 | <i>Zc3hav1</i>   | ns             | ns     | 1.061   | ns       |                 |         |          |               |         |         |
| 1018 | <i>Arhgap11a</i> | ns             | ns     | 1.062   | ns       |                 |         |          |               |         |         |
| 1019 | <i>Ccnt2</i>     | ns             | ns     | 1.062   | ns       |                 |         |          |               |         |         |
| 1020 | <i>Mettl14</i>   | ns             | ns     | 1.062   | ns       |                 |         |          |               |         |         |
| 1021 | <i>Dock11</i>    | ns             | ns     | 1.063   | ns       |                 |         |          |               |         |         |
| 1022 | <i>Nucb2</i>     | ns             | ns     | 1.073   | ns       |                 |         |          |               |         |         |
| 1023 | <i>Mamdc2</i>    | ns             | ns     | 1.081   | ns       |                 | 1.014   |          |               |         |         |
| 1024 | <i>Atad2</i>     | ns             | ns     | 1.081   | ns       |                 |         |          |               |         |         |
| 1025 | <i>Fyb</i>       | ns             | ns     | 1.088   | ns       |                 |         |          |               |         |         |
| 1026 | <i>Galnt7</i>    | ns             | ns     | 1.093   | ns       |                 |         |          |               | 0.797   |         |
| 1027 | <i>Mmrn1</i>     | ns             | ns     | 1.099   | ns       |                 |         |          |               |         |         |
| 1028 | <i>Crispld1</i>  | ns             | ns     | 1.103   | ns       |                 |         |          |               |         |         |
| 1029 | <i>Smek2</i>     | ns             | ns     | 1.104   | ns       |                 |         |          |               |         |         |
| 1030 | <i>Rnasel</i>    | ns             | ns     | 1.105   | ns       |                 |         |          |               |         |         |
| 1031 | <i>Runx1</i>     | ns             | ns     | 1.108   | ns       | 0.767           | 0.917   |          |               |         |         |
| 1032 | <i>Lyve1</i>     | ns             | ns     | 1.111   | ns       |                 |         |          |               |         |         |
| 1033 | <i>Fam46a</i>    | ns             | ns     | 1.111   | ns       |                 |         |          |               |         |         |
| 1034 | <i>Zgrf1</i>     | ns             | ns     | 1.113   | ns       |                 |         |          |               |         |         |
| 1035 | <i>Shox2</i>     | ns             | ns     | 1.115   | ns       |                 | 0.599   |          |               |         |         |
| 1036 | <i>Il18r1</i>    | ns             | ns     | 1.116   | ns       |                 |         |          |               |         |         |
| 1037 | <i>Kif11</i>     | ns             | ns     | 1.119   | ns       |                 |         |          |               |         |         |
| 1038 | <i>Gja1</i>      | ns             | ns     | 1.12    | ns       |                 | 0.790   |          |               | 1.765   |         |
| 1039 | <i>Stat4</i>     | ns             | ns     | 1.124   | ns       |                 |         |          |               |         |         |
| 1040 | <i>Gp49a</i>     | ns             | ns     | 1.127   | ns       |                 |         |          |               |         |         |
| 1041 | <i>Dtl</i>       | ns             | ns     | 1.135   | ns       |                 |         |          |               |         |         |
| 1042 | <i>Brca1</i>     | ns             | ns     | 1.138   | ns       |                 |         |          |               |         |         |
| 1043 | <i>B3gnt5</i>    | ns             | ns     | 1.145   | ns       |                 |         |          |               |         |         |
| 1044 | <i>F13a1</i>     | ns             | ns     | 1.146   | ns       |                 |         |          |               | 1.531   |         |
| 1045 | <i>Phc3</i>      | ns             | ns     | 1.148   | ns       |                 |         |          |               |         |         |
| 1046 | <i>Arid4a</i>    | ns             | ns     | 1.151   | ns       |                 |         |          |               |         |         |
| 1047 | <i>Rbm27</i>     | ns             | ns     | 1.154   | ns       |                 |         |          |               |         |         |
| 1048 | <i>Cdh11</i>     | ns             | ns     | 1.155   | ns       |                 |         |          |               |         |         |
| 1049 | <i>Pola1</i>     | ns             | ns     | 1.156   | ns       |                 |         |          |               |         |         |
| 1050 | <i>Tpx2</i>      | ns             | ns     | 1.157   | ns       |                 |         |          |               |         |         |
| 1051 | <i>Myo5a</i>     | ns             | ns     | 1.157   | ns       |                 | 0.586   |          |               |         |         |
| 1052 | <i>Nupr1</i>     | ns             | ns     | 1.16    | ns       |                 | 1.172   |          |               |         |         |
| 1053 | <i>Ptprc</i>     | ns             | ns     | 1.162   | ns       |                 |         |          |               |         |         |
| 1054 | <i>Ranbp2</i>    | ns             | ns     | 1.163   | ns       |                 |         |          |               |         |         |
| 1055 | <i>Exo1</i>      | ns             | ns     | 1.168   | ns       |                 |         |          |               |         |         |
| 1056 | <i>Cd84</i>      | ns             | ns     | 1.169   | ns       |                 |         |          |               |         |         |
| 1057 | <i>Mpp7</i>      | ns             | ns     | 1.175   | ns       |                 |         |          |               |         |         |
| 1058 | <i>Stk3</i>      | ns             | ns     | 1.18    | ns       |                 |         |          |               | 0.741   |         |
| 1059 | <i>Ccdc174</i>   | ns             | ns     | 1.188   | ns       |                 |         |          |               |         |         |
| 1060 | <i>Lair1</i>     | ns             | ns     | 1.192   | ns       |                 |         |          |               |         |         |
| 1061 | <i>Ckap2l</i>    | ns             | ns     | 1.195   | ns       |                 |         |          |               |         |         |
| 1062 | <i>Fmr1</i>      | ns             | ns     | 1.196   | ns       |                 |         |          |               |         |         |
| 1063 | <i>Hmnr</i>      | ns             | ns     | 1.203   | ns       |                 |         |          |               |         |         |
| 1064 | <i>Dzip3</i>     | ns             | ns     | 1.205   | ns       |                 |         |          |               |         |         |
| 1065 | <i>Rapgef6</i>   | ns             | ns     | 1.206   | ns       |                 |         |          |               |         |         |
| 1066 | <i>Lyst</i>      | ns             | ns     | 1.212   | ns       |                 |         |          |               |         |         |
| 1067 | <i>Sparc</i>     | ns             | ns     | 1.222   | ns       |                 |         |          |               |         |         |
| 1068 | <i>Zcchc6</i>    | ns             | ns     | 1.222   | ns       |                 |         |          |               |         |         |
| 1069 | <i>Ankrd12</i>   | ns             | ns     | 1.223   | ns       |                 |         |          |               | 1.026   |         |
| 1070 | <i>Arap2</i>     | ns             | ns     | 1.225   | ns       |                 |         |          |               |         |         |
| 1071 | <i>Aim2</i>      | ns             | ns     | 1.238   | ns       |                 |         |          |               |         |         |
| 1072 | <i>Cd33</i>      | ns             | ns     | 1.242   | ns       |                 |         |          |               |         |         |
| 1073 | <i>Setd2</i>     | ns             | ns     | 1.248   | ns       |                 |         |          |               | 0.713   |         |
| 1074 | <i>Dock7</i>     | ns             | ns     | 1.251   | ns       |                 |         |          |               |         |         |
| 1075 | <i>Trim58</i>    | ns             | ns     | 1.252   | ns       |                 |         |          |               |         |         |
| 1076 | <i>Skil</i>      | ns             | ns     | 1.253   | ns       |                 |         |          |               |         |         |
| 1077 | <i>Zscan26</i>   | ns             | ns     | 1.259   | ns       |                 |         |          |               |         |         |
| 1078 | <i>Angpt2</i>    | ns             | ns     | 1.264   | ns       |                 |         |          |               |         |         |
| 1079 | <i>Gbp7</i>      | ns             | ns     | 1.264   | ns       |                 |         |          |               |         |         |
| 1080 | <i>C1ra</i>      | ns             | ns     | 1.266   | ns       |                 | 0.899   |          |               |         |         |

| No.  | Gene Name        | TC-whole joint |        |         |          | DMM-whole joint |         |          | DMM-cartilage |         |         |
|------|------------------|----------------|--------|---------|----------|-----------------|---------|----------|---------------|---------|---------|
|      |                  | 1 Day          | 1 Week | 6 Weeks | 12 Weeks | 2 Weeks         | 4 Weeks | 16 Weeks | 1 Week        | 2 Weeks | 6 Weeks |
| 1081 | <i>Suv39h2</i>   | ns             | ns     | 1.268   | ns       |                 |         |          |               |         |         |
| 1082 | <i>Gal3st4</i>   | ns             | ns     | 1.276   | ns       |                 |         |          |               |         |         |
| 1083 | <i>Nusap1</i>    | ns             | ns     | 1.276   | ns       |                 |         |          |               |         |         |
| 1084 | <i>Cep152</i>    | ns             | ns     | 1.277   | ns       |                 |         |          |               |         |         |
| 1085 | <i>Zfp608</i>    | ns             | ns     | 1.282   | ns       |                 |         |          |               |         |         |
| 1086 | <i>Cep170</i>    | ns             | ns     | 1.289   | ns       |                 |         |          |               |         |         |
| 1087 | <i>F5</i>        | ns             | ns     | 1.291   | ns       |                 |         |          |               |         | 0.767   |
| 1088 | <i>Dennd4a</i>   | ns             | ns     | 1.293   | ns       |                 |         |          |               |         |         |
| 1089 | <i>Tnfrsf11b</i> | ns             | ns     | 1.298   | ns       |                 |         |          |               |         |         |
| 1090 | <i>Safb2</i>     | ns             | ns     | 1.3     | ns       |                 |         |          |               |         |         |
| 1091 | <i>Emp3</i>      | ns             | ns     | 1.301   | ns       |                 |         |          |               |         |         |
| 1092 | <i>Tmem184c</i>  | ns             | ns     | 1.302   | ns       |                 |         |          |               |         |         |
| 1093 | <i>Col11a1</i>   | ns             | ns     | 1.303   | ns       |                 |         |          |               |         |         |
| 1094 | <i>Top2a</i>     | ns             | ns     | 1.305   | ns       |                 |         |          |               |         |         |
| 1095 | <i>Ccdc55</i>    | ns             | ns     | 1.307   | ns       |                 |         |          |               |         | 0.694   |
| 1096 | <i>Thoc2</i>     | ns             | ns     | 1.308   | ns       |                 |         |          |               |         |         |
| 1097 | <i>Cybb</i>      | ns             | ns     | 1.31    | ns       |                 |         |          |               |         |         |
| 1098 | <i>Ppil4</i>     | ns             | ns     | 1.317   | ns       |                 |         |          |               |         |         |
| 1099 | <i>Zfp263</i>    | ns             | ns     | 1.321   | ns       |                 |         |          |               |         |         |
| 1100 | <i>Casc5</i>     | ns             | ns     | 1.323   | ns       |                 |         |          |               |         |         |
| 1101 | <i>Akna*</i>     | ns             | ns     | 1.323   | ns       | -0.595          |         |          |               |         |         |
| 1102 | <i>Cep192</i>    | ns             | ns     | 1.323   | ns       |                 |         |          |               |         |         |
| 1103 | <i>Ncapd3</i>    | ns             | ns     | 1.332   | ns       |                 |         |          |               |         |         |
| 1104 | <i>Apol11a</i>   | ns             | ns     | 1.338   | ns       |                 |         |          |               |         |         |
| 1105 | <i>Map3k8</i>    | ns             | ns     | 1.344   | ns       |                 |         |          |               |         |         |
| 1106 | <i>Parp14</i>    | ns             | ns     | 1.345   | ns       |                 |         |          |               |         |         |
| 1107 | <i>Col22a1</i>   | ns             | ns     | 1.352   | ns       |                 | 0.846   |          |               |         |         |
| 1108 | <i>Ceacam1</i>   | ns             | ns     | 1.354   | ns       |                 |         |          |               |         |         |
| 1109 | <i>Cep162</i>    | ns             | ns     | 1.357   | ns       |                 |         |          |               |         |         |
| 1110 | <i>Golim4</i>    | ns             | ns     | 1.36    | ns       |                 |         |          |               |         |         |
| 1111 | <i>Dock10</i>    | ns             | ns     | 1.366   | ns       |                 |         |          |               |         |         |
| 1112 | <i>Gimap3</i>    | ns             | ns     | 1.372   | ns       |                 |         |          |               |         |         |
| 1113 | <i>Wrn</i>       | ns             | ns     | 1.374   | ns       |                 |         |          |               |         |         |
| 1114 | <i>Gcc2</i>      | ns             | ns     | 1.38    | ns       |                 |         |          |               |         |         |
| 1115 | <i>Clec3a</i>    | ns             | ns     | 1.387   | ns       |                 |         |          |               |         |         |
| 1116 | <i>Iqgap2</i>    | ns             | ns     | 1.388   | ns       |                 |         |          |               |         |         |
| 1117 | <i>Susd5</i>     | ns             | ns     | 1.392   | ns       |                 |         |          |               |         |         |
| 1118 | <i>Cep70</i>     | ns             | ns     | 1.394   | ns       |                 |         |          |               |         |         |
| 1119 | <i>Cntrl</i>     | ns             | ns     | 1.405   | ns       |                 |         |          |               |         |         |
| 1120 | <i>Ddx60</i>     | ns             | ns     | 1.411   | ns       |                 |         |          |               |         |         |
| 1121 | <i>Smc4</i>      | ns             | ns     | 1.423   | ns       |                 |         |          |               |         |         |
| 1122 | <i>Taf1</i>      | ns             | ns     | 1.424   | ns       |                 |         |          |               |         |         |
| 1123 | <i>Ndc80</i>     | ns             | ns     | 1.424   | ns       |                 |         |          |               |         |         |
| 1124 | <i>Jmjd1c</i>    | ns             | ns     | 1.426   | ns       |                 |         |          |               |         |         |
| 1125 | <i>Primpol</i>   | ns             | ns     | 1.432   | ns       |                 |         |          |               |         |         |
| 1126 | <i>Hmgn3</i>     | ns             | ns     | 1.432   | ns       |                 |         |          |               |         | 1.097   |
| 1127 | <i>Ccdc88a</i>   | ns             | ns     | 1.433   | ns       |                 |         |          |               |         |         |
| 1128 | <i>Hemgn</i>     | ns             | ns     | 1.441   | ns       |                 |         |          |               |         |         |
| 1129 | <i>Igsf6</i>     | ns             | ns     | 1.446   | ns       |                 |         |          |               |         |         |
| 1130 | <i>Trem12</i>    | ns             | ns     | 1.447   | ns       |                 |         |          |               |         |         |
| 1131 | <i>Aspm</i>      | ns             | ns     | 1.454   | ns       |                 |         |          |               |         |         |
| 1132 | <i>Hirip3</i>    | ns             | ns     | 1.456   | ns       |                 |         |          |               |         |         |
| 1133 | <i>nsun6</i>     | ns             | ns     | 1.458   | ns       |                 |         |          |               |         |         |
| 1134 | <i>Mis18bp1</i>  | ns             | ns     | 1.465   | ns       |                 |         |          |               |         |         |
| 1135 | <i>Gm1966</i>    | ns             | ns     | 1.472   | ns       |                 |         |          |               |         |         |
| 1136 | <i>Spp1</i>      | ns             | ns     | 1.481   | ns       |                 |         |          |               |         |         |
| 1137 | <i>Cd300lf</i>   | ns             | ns     | 1.494   | ns       |                 |         |          |               |         |         |
| 1138 | <i>Cpne3</i>     | ns             | ns     | 1.507   | ns       |                 |         |          |               |         | 1.529   |
| 1139 | <i>I17r</i>      | ns             | ns     | 1.51    | ns       |                 |         |          |               |         |         |
| 1140 | <i>Eif2ak2</i>   | ns             | ns     | 1.521   | ns       | 0.687           |         |          |               |         |         |
| 1141 | <i>Pla2g4a</i>   | ns             | ns     | 1.533   | ns       |                 |         |          |               |         | 0.884   |
| 1142 | <i>Ccar1</i>     | ns             | ns     | 1.536   | ns       |                 |         |          |               |         |         |
| 1143 | <i>Apobr</i>     | ns             | ns     | 1.545   | ns       |                 |         |          |               |         |         |
| 1144 | <i>Cenpf</i>     | ns             | ns     | 1.558   | ns       |                 |         |          |               |         |         |

| No.  | Gene Name            | TC-whole joint |        |         |          | DMM-whole joint |         |          | DMM-cartilage |         |         |
|------|----------------------|----------------|--------|---------|----------|-----------------|---------|----------|---------------|---------|---------|
|      |                      | 1 Day          | 1 Week | 6 Weeks | 12 Weeks | 2 Weeks         | 4 Weeks | 16 Weeks | 1 Week        | 2 Weeks | 6 Weeks |
| 1145 | <i>Cep55</i>         | ns             | ns     | 1.565   | ns       |                 |         |          |               |         |         |
| 1146 | <i>Cfh</i>           | ns             | ns     | 1.573   | ns       |                 |         |          |               |         |         |
| 1147 | <i>Mmp13</i>         | ns             | ns     | 1.573   | ns       |                 | 0.851   |          |               |         |         |
| 1148 | <i>Kif20b</i>        | ns             | ns     | 1.576   | ns       |                 |         |          |               |         |         |
| 1149 | <i>Stfa2l1</i>       | ns             | ns     | 1.579   | ns       |                 |         |          |               |         |         |
| 1150 | <i>Cd300ld</i>       | ns             | ns     | 1.586   | ns       |                 |         |          |               |         |         |
| 1151 | <i>Ccp110</i>        | ns             | ns     | 1.595   | ns       |                 |         |          |               |         |         |
| 1152 | <i>Mastl</i>         | ns             | ns     | 1.6     | ns       |                 |         |          |               |         |         |
| 1153 | <i>Chml</i>          | ns             | ns     | 1.602   | ns       |                 |         |          |               |         |         |
| 1154 | <i>Col2a1</i>        | ns             | ns     | 1.607   | ns       |                 |         |          |               |         |         |
| 1155 | <i>Gramd1c</i>       | ns             | ns     | 1.616   | ns       |                 |         |          |               |         |         |
| 1156 | <i>Cep135</i>        | ns             | ns     | 1.629   | ns       |                 |         |          |               |         |         |
| 1157 | <i>Lilrb4</i>        | ns             | ns     | 1.658   | ns       |                 |         |          |               |         |         |
| 1158 | <i>Dmp1</i>          | ns             | ns     | 1.668   | ns       |                 |         |          |               |         |         |
| 1159 | <i>1700112E06Rik</i> | ns             | ns     | 1.676   | ns       |                 |         |          |               |         |         |
| 1160 | <i>Cenpj</i>         | ns             | ns     | 1.691   | ns       |                 |         |          |               |         |         |
| 1161 | <i>Bex6</i>          | ns             | ns     | 1.697   | ns       |                 |         |          |               |         |         |
| 1162 | <i>Gm11974</i>       | ns             | ns     | 1.706   | ns       |                 |         |          |               |         |         |
| 1163 | <i>Colec12</i>       | ns             | ns     | 1.722   | ns       |                 | 0.833   |          |               |         |         |
| 1164 | <i>Fap</i>           | ns             | ns     | 1.734   | ns       |                 | 0.889   |          |               |         |         |
| 1165 | <i>Spta1</i>         | ns             | ns     | 1.781   | ns       |                 |         |          |               |         |         |
| 1166 | <i>Snai2</i>         | ns             | ns     | 1.802   | ns       |                 | 0.785   |          |               |         |         |
| 1167 | <i>Blm</i>           | ns             | ns     | 1.802   | ns       |                 |         |          |               | 3.125   |         |
| 1168 | <i>E330020D12Rik</i> | ns             | ns     | 1.807   | ns       |                 |         |          |               |         |         |
| 1169 | <i>Mki67</i>         | ns             | ns     | 1.822   | ns       |                 |         |          |               |         |         |
| 1170 | <i>Ibsp</i>          | ns             | ns     | 1.863   | ns       |                 | 0.758   |          |               |         |         |
| 1171 | <i>Atp6v0d2</i>      | ns             | ns     | 1.881   | ns       |                 |         |          |               |         |         |
| 1172 | <i>Serpini1</i>      | ns             | ns     | 1.921   | ns       |                 |         |          |               | 1.212   |         |
| 1173 | <i>Dio2</i>          | ns             | ns     | 1.947   | ns       |                 | 0.686   |          |               |         |         |
| 1174 | <i>Kif15</i>         | ns             | ns     | 1.983   | ns       |                 |         |          |               |         |         |
| 1175 | <i>Cenpe</i>         | ns             | ns     | 2.241   | ns       |                 |         |          |               |         |         |
| 1176 | <i>Gm9079</i>        | ns             | ns     | 2.81    | ns       |                 |         |          |               |         |         |
| 1177 | <i>Sned1</i>         | ns             | ns     | 10.904  | ns       | 0.771           | 1.448   |          |               |         |         |
| 1178 | <i>Esrrg</i>         | ns             | -1.526 | ns      | ns       |                 |         |          |               |         |         |
| 1179 | <i>Ckmt2</i>         | ns             | -1.3   | ns      | ns       |                 |         |          |               |         |         |
| 1180 | <i>Smtnl1</i>        | ns             | -1.255 | ns      | ns       |                 |         |          |               |         |         |
| 1181 | <i>Nos1</i>          | ns             | -1.082 | ns      | ns       |                 |         |          |               |         |         |
| 1182 | <i>Actn2</i>         | ns             | -1.056 | ns      | ns       |                 |         |          |               |         |         |
| 1183 | <i>Xirp1</i>         | ns             | -1.034 | ns      | ns       |                 |         |          |               |         |         |
| 1184 | <i>Hspa1l</i>        | ns             | -1.01  | ns      | ns       |                 |         |          |               |         |         |
| 1185 | <i>1810044D09Rik</i> | ns             | -1.007 | ns      | ns       |                 |         |          |               |         |         |
| 1186 | <i>Plet1os</i>       | ns             | -0.988 | ns      | ns       |                 |         |          |               |         |         |
| 1187 | <i>Mb</i>            | ns             | -0.977 | ns      | ns       |                 |         |          |               | -1.820  |         |
| 1188 | <i>Dusp26</i>        | ns             | -0.971 | ns      | ns       |                 |         |          |               |         |         |
| 1189 | <i>Asb5</i>          | ns             | -0.887 | ns      | ns       |                 |         |          |               |         |         |
| 1190 | <i>Cidec</i>         | ns             | -0.862 | ns      | ns       | -1.271          | -1.009  |          |               |         |         |
| 1191 | <i>B330016D10Rik</i> | ns             | -0.85  | ns      | ns       |                 |         |          |               |         |         |
| 1192 | <i>Lmcd1</i>         | ns             | -0.845 | ns      | ns       |                 |         |          |               |         |         |
| 1193 | <i>Kcna7</i>         | ns             | -0.839 | ns      | ns       |                 |         |          |               |         |         |
| 1194 | <i>Hspb6</i>         | ns             | -0.832 | ns      | ns       |                 |         |          |               |         |         |
| 1195 | <i>Alpk3</i>         | ns             | -0.831 | ns      | ns       |                 |         |          |               |         |         |
| 1196 | <i>Fhl1</i>          | ns             | -0.812 | ns      | ns       |                 |         |          |               |         |         |
| 1197 | <i>Lmod3</i>         | ns             | -0.799 | ns      | ns       |                 |         |          |               |         |         |
| 1198 | <i>Nrap</i>          | ns             | -0.797 | ns      | ns       |                 |         |          |               |         |         |
| 1199 | <i>Mapt</i>          | ns             | -0.77  | ns      | ns       |                 |         |          |               |         |         |
| 1200 | <i>Ppargc1a</i>      | ns             | -0.766 | ns      | ns       |                 |         |          |               |         |         |
| 1201 | <i>A930003A15Rik</i> | ns             | -0.752 | ns      | ns       |                 |         |          |               |         |         |
| 1202 | <i>Asb12</i>         | ns             | -0.745 | ns      | ns       |                 |         |          |               |         |         |
| 1203 | <i>3425401B19Rik</i> | ns             | -0.735 | ns      | ns       |                 |         |          |               |         |         |
| 1204 | <i>Angptl7</i>       | ns             | -0.722 | ns      | ns       |                 |         |          |               | -1.695  |         |
| 1205 | <i>Myot</i>          | ns             | -0.704 | ns      | ns       |                 |         |          |               |         |         |
| 1206 | <i>Usp13</i>         | ns             | -0.704 | ns      | ns       |                 |         |          |               |         |         |
| 1207 | <i>Fam13a</i>        | ns             | -0.701 | ns      | ns       |                 |         |          |               |         |         |
| 1208 | <i>Ugp2</i>          | ns             | -0.697 | ns      | ns       |                 |         |          |               |         |         |

| No.  | Gene Name       | TC-whole joint |        |         |          | DMM-whole joint |         |          | DMM-cartilage |         |         |
|------|-----------------|----------------|--------|---------|----------|-----------------|---------|----------|---------------|---------|---------|
|      |                 | 1 Day          | 1 Week | 6 Weeks | 12 Weeks | 2 Weeks         | 4 Weeks | 16 Weeks | 1 Week        | 2 Weeks | 6 Weeks |
| 1209 | <i>Asb11</i>    | ns             | -0.694 | ns      | ns       |                 |         |          |               |         |         |
| 1210 | <i>Rbm20</i>    | ns             | -0.692 | ns      | ns       |                 |         |          |               |         |         |
| 1211 | <i>Kbtbd13</i>  | ns             | -0.687 | ns      | ns       |                 |         |          |               |         |         |
| 1212 | <i>Cox6a2</i>   | ns             | -0.68  | ns      | ns       |                 |         |          |               | -2.204  |         |
| 1213 | <i>Adssl1</i>   | ns             | -0.674 | ns      | ns       |                 |         |          |               |         |         |
| 1214 | <i>Pm20d2</i>   | ns             | -0.671 | ns      | ns       |                 |         |          |               |         |         |
| 1215 | <i>Adck3</i>    | ns             | -0.67  | ns      | ns       |                 |         |          |               |         |         |
| 1216 | <i>Mlxipl</i>   | ns             | -0.669 | ns      | ns       |                 |         |          |               |         |         |
| 1217 | <i>Ifitm5</i>   | ns             | -0.669 | ns      | ns       |                 |         |          |               |         |         |
| 1218 | <i>Atp1a2</i>   | ns             | -0.666 | ns      | ns       |                 |         |          |               | -1.075  |         |
| 1219 | <i>Lrrc14b</i>  | ns             | -0.662 | ns      | ns       |                 |         |          |               |         |         |
| 1220 | <i>Padi2</i>    | ns             | -0.658 | ns      | ns       |                 |         |          |               | -2.928  | -3.742  |
| 1221 | <i>Ppp1r1a</i>  | ns             | -0.657 | ns      | ns       |                 |         |          |               |         |         |
| 1222 | <i>Homer2</i>   | ns             | -0.655 | ns      | ns       |                 |         |          |               |         |         |
| 1223 | <i>Asb2</i>     | ns             | -0.65  | ns      | ns       |                 |         |          |               |         |         |
| 1224 | <i>Mgmt</i>     | ns             | -0.644 | ns      | ns       |                 |         |          |               |         |         |
| 1225 | <i>Slc2a4</i>   | ns             | -0.642 | ns      | ns       |                 |         |          |               | -2.034  |         |
| 1226 | <i>Got1</i>     | ns             | -0.641 | ns      | ns       |                 |         |          |               |         |         |
| 1227 | <i>Unc45b</i>   | ns             | -0.636 | ns      | ns       |                 |         |          |               |         |         |
| 1228 | <i>Tdrp</i>     | ns             | -0.636 | ns      | ns       |                 |         |          |               |         |         |
| 1229 | <i>Vegfb</i>    | ns             | -0.634 | ns      | ns       |                 |         |          |               | -0.745  |         |
| 1230 | <i>Slc9a2</i>   | ns             | -0.63  | ns      | ns       |                 |         |          |               |         |         |
| 1231 | <i>Ppp1r3c</i>  | ns             | -0.629 | ns      | ns       |                 |         |          |               | -3.235  |         |
| 1232 | <i>Tpm2</i>     | ns             | -0.627 | ns      | ns       |                 |         |          |               | -0.687  |         |
| 1233 | <i>E2f6</i>     | ns             | -0.625 | ns      | ns       |                 |         |          |               |         |         |
| 1234 | <i>Slc38a3</i>  | ns             | -0.625 | ns      | ns       |                 |         |          |               | -1.094  |         |
| 1235 | <i>Myom3</i>    | ns             | -0.618 | ns      | ns       |                 |         |          |               |         |         |
| 1236 | <i>Srl</i>      | ns             | -0.611 | ns      | ns       |                 |         |          |               |         |         |
| 1237 | <i>Prob1</i>    | ns             | -0.61  | ns      | ns       |                 |         |          |               |         |         |
| 1238 | <i>Mtfp1</i>    | ns             | -0.609 | ns      | ns       |                 |         |          |               |         |         |
| 1239 | <i>Magix</i>    | ns             | -0.607 | ns      | ns       |                 |         |          |               |         |         |
| 1240 | <i>Lynx1</i>    | ns             | -0.604 | ns      | ns       |                 |         |          |               | -0.671  | -1.230  |
| 1241 | <i>Myl1</i>     | ns             | -0.604 | ns      | ns       |                 |         |          |               |         |         |
| 1242 | <i>Eci1</i>     | ns             | -0.603 | ns      | ns       |                 |         |          |               |         |         |
| 1243 | <i>Tpd52l1</i>  | ns             | -0.602 | ns      | ns       |                 |         |          |               |         |         |
| 1244 | <i>Mdh1</i>     | ns             | -0.601 | ns      | ns       |                 |         |          |               |         |         |
| 1245 | <i>Fam57b</i>   | ns             | -0.599 | ns      | ns       |                 |         |          |               |         |         |
| 1246 | <i>Lipc</i>     | ns             | -0.596 | ns      | ns       | -0.640          |         |          |               |         |         |
| 1247 | <i>Zswim7</i>   | ns             | -0.593 | ns      | ns       |                 |         |          |               |         |         |
| 1248 | <i>St8sia5</i>  | ns             | -0.592 | ns      | ns       |                 |         |          |               |         |         |
| 1249 | <i>Pfkm</i>     | ns             | -0.592 | ns      | ns       |                 |         |          |               | -0.846  |         |
| 1250 | <i>Mylk2</i>    | ns             | -0.591 | ns      | ns       |                 |         |          |               |         |         |
| 1251 | <i>Txlnb</i>    | ns             | -0.589 | ns      | ns       |                 |         |          |               |         |         |
| 1252 | <i>Fam134b</i>  | ns             | -0.587 | ns      | ns       |                 |         |          |               |         |         |
| 1253 | <i>Lpl</i>      | ns             | -0.586 | ns      | ns       |                 |         |          |               |         |         |
| 1254 | <i>Bglap2</i>   | ns             | -0.585 | ns      | ns       |                 |         |          |               |         |         |
| 1255 | <i>Fbp2</i>     | ns             | -0.585 | ns      | ns       |                 |         |          |               |         |         |
| 1256 | <i>Clic5</i>    | ns             | -0.583 | ns      | ns       |                 |         |          |               |         |         |
| 1257 | <i>Acacb</i>    | ns             | -0.582 | ns      | ns       |                 |         |          |               | -0.981  | -1.572  |
| 1258 | <i>Ephb4</i>    | ns             | 0.592  | ns      | ns       |                 |         |          |               | 0.619   |         |
| 1259 | <i>Trim2</i>    | ns             | 0.594  | ns      | ns       |                 | 0.647   |          |               |         |         |
| 1260 | <i>Rbfox2</i>   | ns             | 0.597  | ns      | ns       |                 | 0.717   |          |               |         |         |
| 1261 | <i>Crip2</i>    | ns             | 0.597  | ns      | ns       |                 |         |          |               |         |         |
| 1262 | <i>Pik3r3</i>   | ns             | 0.6    | ns      | ns       |                 | 0.615   |          |               |         |         |
| 1263 | <i>Zfp9</i>     | ns             | 0.607  | ns      | ns       |                 | 0.754   |          |               | 0.710   |         |
| 1264 | <i>Gale</i>     | ns             | 0.607  | ns      | ns       |                 |         |          |               |         |         |
| 1265 | <i>Ddah2</i>    | ns             | 0.608  | ns      | ns       |                 |         |          |               |         |         |
| 1266 | <i>Sesn3</i>    | ns             | 0.609  | ns      | ns       |                 | 0.610   |          |               |         |         |
| 1267 | <i>Sfxn3</i>    | ns             | 0.609  | ns      | ns       | 0.642           | 0.687   |          |               |         |         |
| 1268 | <i>Twist1</i>   | ns             | 0.61   | ns      | ns       |                 |         |          |               | 1.056   | 1.537   |
| 1269 | <i>Cdkn1c</i>   | ns             | 0.611  | ns      | ns       |                 |         |          |               |         |         |
| 1270 | <i>Ppapdc1b</i> | ns             | 0.621  | ns      | ns       |                 |         |          |               |         |         |
| 1271 | <i>Slc39a13</i> | ns             | 0.623  | ns      | ns       |                 |         |          |               |         |         |
| 1272 | <i>Lhfp</i>     | ns             | 0.625  | ns      | ns       |                 | 0.705   |          |               | 1.435   |         |

| No.  | Gene Name            | TC-whole joint |        |         |          | DMM-whole joint |         |          | DMM-cartilage |         |         |
|------|----------------------|----------------|--------|---------|----------|-----------------|---------|----------|---------------|---------|---------|
|      |                      | 1 Day          | 1 Week | 6 Weeks | 12 Weeks | 2 Weeks         | 4 Weeks | 16 Weeks | 1 Week        | 2 Weeks | 6 Weeks |
| 1273 | <i>Fam102b</i>       | ns             | 0.625  | ns      | ns       |                 |         |          |               |         |         |
| 1274 | <i>Tmem158</i>       | ns             | 0.625  | ns      | ns       |                 |         |          |               |         |         |
| 1275 | <i>Gstm2</i>         | ns             | 0.626  | ns      | ns       |                 |         |          |               |         |         |
| 1276 | <i>Tmem263</i>       | ns             | 0.627  | ns      | ns       |                 |         |          |               |         |         |
| 1277 | <i>Pam</i>           | ns             | 0.63   | ns      | ns       |                 |         |          |               |         |         |
| 1278 | <i>Mex3b</i>         | ns             | 0.63   | ns      | ns       | 0.826           | 0.938   |          |               |         |         |
| 1279 | <i>Sash1</i>         | ns             | 0.633  | ns      | ns       |                 | 0.733   |          |               |         |         |
| 1280 | <i>Vkorc1</i>        | ns             | 0.633  | ns      | ns       |                 | 0.688   |          |               |         |         |
| 1281 | <i>Ehd2</i>          | ns             | 0.635  | ns      | ns       |                 | 0.632   |          |               |         |         |
| 1282 | <i>Emp2</i>          | ns             | 0.642  | ns      | ns       | 0.591           | 0.630   |          |               |         |         |
| 1283 | <i>Ccdc122</i>       | ns             | 0.648  | ns      | ns       |                 |         |          |               |         |         |
| 1284 | <i>Tram2</i>         | ns             | 0.649  | ns      | ns       |                 |         |          |               |         |         |
| 1285 | <i>Col4a1</i>        | ns             | 0.653  | ns      | ns       |                 | 1.091   |          | 1.233         |         |         |
| 1286 | <i>Col4a2</i>        | ns             | 0.653  | ns      | ns       |                 | 1.129   |          |               | 0.690   |         |
| 1287 | <i>1500015010Rik</i> | ns             | 0.654  | ns      | ns       |                 |         |          |               | 1.160   |         |
| 1288 | <i>Plekhg5</i>       | ns             | 0.654  | ns      | ns       |                 |         |          |               |         |         |
| 1289 | <i>Ralgds</i>        | ns             | 0.654  | ns      | ns       | 0.590           |         |          |               | 0.982   |         |
| 1290 | <i>Cgnl1</i>         | ns             | 0.656  | ns      | ns       |                 |         |          |               | 1.078   |         |
| 1291 | <i>Dkk2</i>          | ns             | 0.657  | ns      | ns       |                 | 0.857   |          | 1.013         |         |         |
| 1292 | <i>Fkbp9</i>         | ns             | 0.66   | ns      | ns       |                 | 0.766   |          |               |         |         |
| 1293 | <i>Smo</i>           | ns             | 0.661  | ns      | ns       |                 | 0.962   |          |               |         |         |
| 1294 | <i>Ldlrad4</i>       | ns             | 0.662  | ns      | ns       |                 |         |          |               |         |         |
| 1295 | <i>Igfbp5</i>        | ns             | 0.663  | ns      | ns       |                 |         |          |               |         |         |
| 1296 | <i>Phldb1</i>        | ns             | 0.665  | ns      | ns       |                 |         |          |               |         |         |
| 1297 | <i>Rhoj</i>          | ns             | 0.672  | ns      | ns       |                 | 0.715   |          |               |         |         |
| 1298 | <i>Mcam</i>          | ns             | 0.675  | ns      | ns       |                 |         |          | 1.599         | 2.199   |         |
| 1299 | <i>Rbp4</i>          | ns             | 0.682  | ns      | ns       |                 |         |          |               |         |         |
| 1300 | <i>Mageh1</i>        | ns             | 0.683  | ns      | ns       |                 |         |          |               |         |         |
| 1301 | <i>Mgp</i>           | ns             | 0.684  | ns      | ns       |                 |         |          |               | 3.777   |         |
| 1302 | <i>Kirrel</i>        | ns             | 0.686  | ns      | ns       |                 | 0.652   |          |               |         |         |
| 1303 | <i>Tlr3</i>          | ns             | 0.687  | ns      | ns       |                 |         |          |               | 0.687   |         |
| 1304 | <i>Soga1</i>         | ns             | 0.688  | ns      | ns       |                 |         |          |               |         |         |
| 1305 | <i>Rgs4</i>          | ns             | 0.69   | ns      | ns       |                 | 0.819   |          |               |         |         |
| 1306 | <i>Prdm5</i>         | ns             | 0.69   | ns      | ns       |                 | 1.061   |          |               |         |         |
| 1307 | <i>Flrt2</i>         | ns             | 0.691  | ns      | ns       |                 | 0.874   |          |               |         |         |
| 1308 | <i>Plekhf1</i>       | ns             | 0.691  | ns      | ns       |                 |         |          |               |         |         |
| 1309 | <i>Mras</i>          | ns             | 0.692  | ns      | ns       |                 |         |          | 0.948         | 0.612   |         |
| 1310 | <i>Slitrk6</i>       | ns             | 0.692  | ns      | ns       |                 | 0.733   |          | 2.011         | 1.776   |         |
| 1311 | <i>Ubt2</i>          | ns             | 0.692  | ns      | ns       | 0.731           | 0.999   |          |               |         |         |
| 1312 | <i>Crtap</i>         | ns             | 0.694  | ns      | ns       |                 |         |          |               |         |         |
| 1313 | <i>Fam198b</i>       | ns             | 0.695  | ns      | ns       |                 | 0.682   |          |               |         |         |
| 1314 | <i>Spats2l</i>       | ns             | 0.696  | ns      | ns       | 1.100           | 0.812   |          |               |         |         |
| 1315 | <i>Armcx1</i>        | ns             | 0.697  | ns      | ns       |                 | 0.653   |          |               |         |         |
| 1316 | <i>Copz2</i>         | ns             | 0.698  | ns      | ns       |                 | 0.823   |          |               |         |         |
| 1317 | <i>Crispld2</i>      | ns             | 0.699  | ns      | ns       | 0.975           | 1.057   |          |               | 1.294   |         |
| 1318 | <i>Lamc1</i>         | ns             | 0.701  | ns      | ns       | 0.770           | 0.700   |          |               |         |         |
| 1319 | <i>Igfbp6</i>        | ns             | 0.703  | ns      | ns       |                 | 0.666   |          |               |         |         |
| 1320 | <i>Rftn2</i>         | ns             | 0.703  | ns      | ns       |                 | 0.883   |          |               |         |         |
| 1321 | <i>Ston1</i>         | ns             | 0.704  | ns      | ns       |                 | 0.617   |          |               |         |         |
| 1322 | <i>Dact1</i>         | ns             | 0.705  | ns      | ns       |                 | 0.646   |          |               |         |         |
| 1323 | <i>Ism1</i>          | ns             | 0.707  | ns      | ns       |                 | 0.817   |          |               |         |         |
| 1324 | <i>Slco2a1</i>       | ns             | 0.71   | ns      | ns       |                 |         |          |               | 1.216   |         |
| 1325 | <i>Pkn3</i>          | ns             | 0.711  | ns      | ns       |                 |         |          |               |         |         |
| 1326 | <i>Tspan2</i>        | ns             | 0.73   | ns      | ns       | 0.701           | 0.823   |          |               | 2.268   |         |
| 1327 | <i>Creb3l2</i>       | ns             | 0.731  | ns      | ns       | 0.615           | 0.734   |          |               |         |         |
| 1328 | <i>Anxa5</i>         | ns             | 0.734  | ns      | ns       |                 | 0.651   |          | 0.861         | 0.752   |         |
| 1329 | <i>Cercam</i>        | ns             | 0.739  | ns      | ns       |                 |         |          |               |         |         |
| 1330 | <i>Nova1</i>         | ns             | 0.74   | ns      | ns       |                 |         |          |               |         |         |
| 1331 | <i>Igfbp4</i>        | ns             | 0.748  | ns      | ns       |                 |         |          |               |         |         |
| 1332 | <i>Ntn1</i>          | ns             | 0.749  | ns      | ns       |                 |         |          |               | 1.352   |         |
| 1333 | <i>Arhgef40</i>      | ns             | 0.751  | ns      | ns       |                 |         |          |               |         |         |
| 1334 | <i>Triqk</i>         | ns             | 0.752  | ns      | ns       |                 |         |          |               |         |         |
| 1335 | <i>Ooep</i>          | ns             | 0.755  | ns      | ns       |                 |         |          |               |         |         |
| 1336 | <i>nsmf</i>          | ns             | 0.758  | ns      | ns       |                 |         |          |               |         |         |

| No.  | Gene Name            | TC-whole joint |        |         |          | DMM-whole joint |         |          | DMM-cartilage |         |         |
|------|----------------------|----------------|--------|---------|----------|-----------------|---------|----------|---------------|---------|---------|
|      |                      | 1 Day          | 1 Week | 6 Weeks | 12 Weeks | 2 Weeks         | 4 Weeks | 16 Weeks | 1 Week        | 2 Weeks | 6 Weeks |
| 1337 | <i>Adamts14</i>      | ns             | 0.759  | ns      | ns       | 0.658           | 0.609   |          |               |         |         |
| 1338 | <i>Hebp2</i>         | ns             | 0.762  | ns      | ns       |                 |         |          | 1.509         |         |         |
| 1339 | <i>Tmem47</i>        | ns             | 0.774  | ns      | ns       | 0.673           | 0.894   |          |               |         |         |
| 1340 | <i>Srpx</i>          | ns             | 0.775  | ns      | ns       |                 | 0.758   |          |               |         |         |
| 1341 | <i>Gstt3</i>         | ns             | 0.777  | ns      | ns       |                 | 0.596   |          |               |         |         |
| 1342 | <i>Ednra</i>         | ns             | 0.777  | ns      | ns       | 0.762           | 1.364   |          |               |         |         |
| 1343 | <i>Gxylt2</i>        | ns             | 0.78   | ns      | ns       |                 | 0.947   |          |               |         |         |
| 1344 | <i>Vasn</i>          | ns             | 0.78   | ns      | ns       | 0.613           | 0.871   |          | 0.834         | 0.885   |         |
| 1345 | <i>Gpx8</i>          | ns             | 0.788  | ns      | ns       |                 | 0.725   |          |               |         |         |
| 1346 | <i>Fam167a</i>       | ns             | 0.788  | ns      | ns       |                 | 0.905   |          |               |         |         |
| 1347 | <i>Errfi1</i>        | ns             | 0.789  | ns      | ns       |                 | 1.020   |          | 2.585         | 2.418   |         |
| 1348 | <i>Myadm</i>         | ns             | 0.789  | ns      | ns       | 0.626           | 0.629   |          |               | 0.795   |         |
| 1349 | <i>Hspg2</i>         | ns             | 0.791  | ns      | ns       | 0.774           | 0.889   |          |               |         |         |
| 1350 | <i>Fndc3b</i>        | ns             | 0.792  | ns      | ns       |                 | 0.732   |          | 1.058         |         |         |
| 1351 | <i>Lhfpl2</i>        | ns             | 0.794  | ns      | ns       |                 | 0.592   |          |               |         |         |
| 1352 | <i>Igfbp3</i>        | ns             | 0.795  | ns      | ns       | 0.955           | 1.279   |          |               |         |         |
| 1353 | <i>Nid1</i>          | ns             | 0.804  | ns      | ns       |                 | 0.593   |          | 1.044         |         |         |
| 1354 | <i>S1pr2</i>         | ns             | 0.805  | ns      | ns       |                 |         |          |               |         |         |
| 1355 | <i>Serf1</i>         | ns             | 0.808  | ns      | ns       |                 | 0.635   |          |               |         |         |
| 1356 | <i>Mdk</i>           | ns             | 0.817  | ns      | ns       | 0.589           | 0.668   |          |               |         |         |
| 1357 | <i>Lrrc49</i>        | ns             | 0.822  | ns      | ns       |                 | 0.625   |          |               |         |         |
| 1358 | <i>Rtnk</i>          | ns             | 0.823  | ns      | ns       |                 |         |          |               |         |         |
| 1359 | <i>Atp8b2</i>        | ns             | 0.826  | ns      | ns       |                 | 0.695   |          |               |         |         |
| 1360 | <i>Lix1l</i>         | ns             | 0.827  | ns      | ns       | 0.756           | 0.844   |          |               |         |         |
| 1361 | <i>Tnc</i>           | ns             | 0.829  | ns      | ns       |                 | 0.618   |          |               |         |         |
| 1362 | <i>Dlg4</i>          | ns             | 0.84   | ns      | ns       | 0.598           |         |          |               |         |         |
| 1363 | <i>Slc7a2</i>        | ns             | 0.851  | ns      | ns       | 1.133           | 1.203   |          | 1.910         |         |         |
| 1364 | <i>Rbms3</i>         | ns             | 0.853  | ns      | ns       |                 | 0.597   |          |               |         |         |
| 1365 | <i>Nid2</i>          | ns             | 0.854  | ns      | ns       |                 | 0.952   |          | 0.883         |         |         |
| 1366 | <i>Parva</i>         | ns             | 0.856  | ns      | ns       | 0.759           | 0.663   |          | 0.682         | 0.877   |         |
| 1367 | <i>Rhbdf1</i>        | ns             | 0.86   | ns      | ns       |                 |         |          |               |         |         |
| 1368 | <i>Spats2</i>        | ns             | 0.861  | ns      | ns       | 0.616           |         |          |               |         |         |
| 1369 | <i>Klhl13</i>        | ns             | 0.869  | ns      | ns       |                 | 1.311   |          |               |         |         |
| 1370 | <i>B3gnt9</i>        | ns             | 0.875  | ns      | ns       |                 |         |          |               |         |         |
| 1371 | <i>Lpar1</i>         | ns             | 0.877  | ns      | ns       | 0.665           | 0.865   |          |               |         |         |
| 1372 | <i>Cemip</i>         | ns             | 0.882  | ns      | ns       |                 |         |          |               |         |         |
| 1373 | <i>Tsku</i>          | ns             | 0.885  | ns      | ns       |                 | 0.705   |          |               |         |         |
| 1374 | <i>2610203C20Rik</i> | ns             | 0.892  | ns      | ns       | 0.681           | 0.834   |          |               |         |         |
| 1375 | <i>Sema3c</i>        | ns             | 0.899  | ns      | ns       |                 | 0.616   |          | 0.909         |         |         |
| 1376 | <i>Sh3pxd2b</i>      | ns             | 0.9    | ns      | ns       |                 | 0.769   |          |               |         |         |
| 1377 | <i>Pdgfc</i>         | ns             | 0.903  | ns      | ns       | 0.590           | 0.632   |          | 1.419         | 1.770   |         |
| 1378 | <i>Rin2</i>          | ns             | 0.906  | ns      | ns       |                 |         |          | 1.835         |         |         |
| 1379 | <i>Farp1</i>         | ns             | 0.914  | ns      | ns       |                 | 0.678   |          |               |         |         |
| 1380 | <i>Cdr2l</i>         | ns             | 0.915  | ns      | ns       |                 | 0.588   |          |               |         |         |
| 1381 | <i>Gpc6</i>          | ns             | 0.919  | ns      | ns       |                 |         |          |               |         |         |
| 1382 | <i>Boc</i>           | ns             | 0.923  | ns      | ns       |                 |         |          |               |         |         |
| 1383 | <i>Slc2a13</i>       | ns             | 0.929  | ns      | ns       |                 | 0.896   |          |               |         |         |
| 1384 | <i>Arhgef25</i>      | ns             | 0.93   | ns      | ns       |                 |         |          |               |         |         |
| 1385 | <i>Cspg4</i>         | ns             | 0.936  | ns      | ns       |                 |         | 0.643    |               |         |         |
| 1386 | <i>Fzd6</i>          | ns             | 0.941  | ns      | ns       | 0.875           | 0.904   |          |               |         |         |
| 1387 | <i>Procr</i>         | ns             | 0.942  | ns      | ns       |                 | 0.708   |          | 1.038         |         |         |
| 1388 | <i>Arhgap42</i>      | ns             | 0.944  | ns      | ns       | 0.630           | 0.791   |          |               |         |         |
| 1389 | <i>Spaca6</i>        | ns             | 0.953  | ns      | ns       |                 |         |          |               |         |         |
| 1390 | <i>9230110C19Rik</i> | ns             | 0.964  | ns      | ns       |                 |         |          |               |         |         |
| 1391 | <i>Fzd8</i>          | ns             | 0.971  | ns      | ns       | 0.969           | 0.623   |          |               |         |         |
| 1392 | <i>Ackr3</i>         | ns             | 0.972  | ns      | ns       |                 |         |          |               |         |         |
| 1393 | <i>Cys1</i>          | ns             | 0.973  | ns      | ns       |                 |         |          |               |         |         |
| 1394 | <i>H19</i>           | ns             | 0.98   | ns      | ns       | 1.425           | 1.679   |          |               |         |         |
| 1395 | <i>L3hypdh</i>       | ns             | 0.996  | ns      | ns       |                 |         |          |               |         |         |
| 1396 | <i>Fkbp14</i>        | ns             | 0.997  | ns      | ns       | 0.711           | 1.098   |          | 0.675         | 0.621   |         |
| 1397 | <i>Peg3</i>          | ns             | 1.001  | ns      | ns       |                 | 0.868   |          |               |         |         |
| 1398 | <i>Ltbp3</i>         | ns             | 1.006  | ns      | ns       | 0.921           | 0.837   |          | 1.275         | 0.973   |         |
| 1399 | <i>Mtmr11</i>        | ns             | 1.014  | ns      | ns       | 1.087           | 1.119   |          |               |         |         |
| 1400 | <i>Ndufa4l2</i>      | ns             | 1.016  | ns      | ns       |                 |         |          |               |         |         |

| No.  | Gene Name      | TC-whole joint |        |         |          | DMM-whole joint |         |          | DMM-cartilage |         |         |
|------|----------------|----------------|--------|---------|----------|-----------------|---------|----------|---------------|---------|---------|
|      |                | 1 Day          | 1 Week | 6 Weeks | 12 Weeks | 2 Weeks         | 4 Weeks | 16 Weeks | 1 Week        | 2 Weeks | 6 Weeks |
| 1401 | <i>Scarf2</i>  | ns             | 1.024  | ns      | ns       | 0.652           | 0.786   |          |               |         |         |
| 1402 | <i>Fmod</i>    | ns             | 1.025  | ns      | ns       | 1.060           | 1.445   | 1.562    |               |         |         |
| 1403 | <i>Nlgn2</i>   | ns             | 1.03   | ns      | ns       |                 |         |          |               |         |         |
| 1404 | <i>Zfp521</i>  | ns             | 1.035  | ns      | ns       | 0.914           | 1.137   |          |               |         |         |
| 1405 | <i>Ppic</i>    | ns             | 1.035  | ns      | ns       | 0.718           | 0.899   |          |               |         |         |
| 1406 | <i>Zfp354c</i> | ns             | 1.043  | ns      | ns       | 0.887           | 1.110   |          |               |         |         |
| 1407 | <i>Spsb1</i>   | ns             | 1.062  | ns      | ns       | 0.736           | 0.948   |          | 1.303         | 1.226   |         |
| 1408 | <i>Sec16b</i>  | ns             | 1.079  | ns      | ns       |                 | 0.943   |          |               |         |         |
| 1409 | <i>Timp2</i>   | ns             | 1.082  | ns      | ns       | 0.868           | 0.841   |          |               |         |         |
| 1410 | <i>Tfpi2</i>   | ns             | 1.083  | ns      | ns       |                 | 1.099   |          |               |         |         |
| 1411 | <i>Lpar4</i>   | ns             | 1.084  | ns      | ns       |                 | 0.899   |          |               |         |         |
| 1412 | <i>Slc2a10</i> | ns             | 1.092  | ns      | ns       | 0.599           | 0.846   |          |               | 1.502   |         |
| 1413 | <i>Sox9</i>    | ns             | 1.099  | ns      | ns       |                 |         |          |               | 0.979   |         |
| 1414 | <i>Pdgfr1</i>  | ns             | 1.125  | ns      | ns       | 0.961           | 1.290   |          |               | 0.791   |         |
| 1415 | <i>Htra3</i>   | ns             | 1.127  | ns      | ns       |                 | 0.995   |          | 1.603         | 1.367   |         |
| 1416 | <i>Ogn</i>     | ns             | 1.129  | ns      | ns       |                 |         |          |               |         |         |
| 1417 | <i>Cd276</i>   | ns             | 1.133  | ns      | ns       |                 | 0.679   |          |               |         |         |
| 1418 | <i>Pkd1</i>    | ns             | 1.147  | ns      | ns       | 0.731           | 0.747   |          |               |         |         |
| 1419 | <i>Fgf14</i>   | ns             | 1.162  | ns      | ns       |                 |         |          |               |         |         |
| 1420 | <i>Igf2</i>    | ns             | 1.184  | ns      | ns       | 0.708           |         |          |               |         |         |
| 1421 | <i>Pitx1</i>   | ns             | 1.185  | ns      | ns       |                 |         |          |               |         |         |
| 1422 | <i>Olfml1</i>  | ns             | 1.198  | ns      | ns       |                 | 0.754   |          |               |         |         |
| 1423 | <i>Gas1</i>    | ns             | 1.257  | ns      | ns       |                 |         |          |               |         |         |
| 1424 | <i>Plagl1</i>  | ns             | 1.272  | ns      | ns       |                 |         |          |               |         |         |
| 1425 | <i>Nr4a2</i>   | ns             | 1.283  | ns      | ns       | 1.529           | 2.246   |          |               | 1.997   |         |
| 1426 | <i>Robo1</i>   | ns             | 1.293  | ns      | ns       |                 | 1.227   |          |               |         |         |
| 1427 | <i>Itga11</i>  | ns             | 1.311  | ns      | ns       |                 |         |          |               |         |         |
| 1428 | <i>Kera</i>    | ns             | 1.327  | ns      | ns       |                 | 1.886   |          |               |         |         |
| 1429 | <i>Cpxm2</i>   | ns             | 1.336  | ns      | ns       | 1.160           | 1.355   |          |               |         |         |
| 1430 | <i>Dnm1</i>    | ns             | 1.39   | ns      | ns       | 0.595           | 0.667   |          |               |         |         |
| 1431 | <i>C1qtnf1</i> | ns             | 1.437  | ns      | ns       | 0.941           | 1.216   |          |               |         |         |
| 1432 | <i>Col8a2</i>  | ns             | 1.449  | ns      | ns       | 1.313           | 1.738   |          |               |         |         |
| 1433 | <i>Chsy3</i>   | ns             | 1.465  | ns      | ns       | 1.117           | 0.869   |          |               |         |         |
| 1434 | <i>Matn4</i>   | ns             | 1.469  | ns      | ns       |                 | 0.987   |          |               |         |         |
| 1435 | <i>Spon2</i>   | ns             | 1.481  | ns      | ns       | 0.862           | 0.789   |          | 0.984         | 1.073   |         |
| 1436 | <i>Cpxm1</i>   | ns             | 1.502  | ns      | ns       | 0.756           | 1.012   |          |               |         |         |
| 1437 | <i>Mfap2</i>   | ns             | 1.56   | ns      | ns       |                 | 0.921   |          |               |         |         |
| 1438 | <i>Rspo2</i>   | ns             | 1.562  | ns      | ns       |                 | 0.924   |          |               |         |         |
| 1439 | <i>Itm2a</i>   | ns             | 1.607  | ns      | ns       | 1.133           | 1.239   |          |               |         |         |
| 1440 | <i>Tnmd</i>    | ns             | 1.832  | ns      | ns       | 1.873           | 2.136   | 1.916    |               |         |         |
| 1441 | <i>Piezo2</i>  | ns             | 2.01   | ns      | ns       |                 |         |          |               |         |         |
| 1442 | <i>Ptgs2</i>   | ns             | 2.01   | ns      | ns       |                 | 1.724   |          | 3.632         | 3.770   |         |
| 1443 | <i>Fam180a</i> | ns             | 2.072  | ns      | ns       |                 |         |          |               |         |         |
| 1444 | <i>Fbn2</i>    | ns             | 2.503  | ns      | ns       | 1.591           | 1.555   |          |               |         |         |
| 1445 | <i>Moxd1</i>   | ns             | 2.79   | ns      | ns       | 1.780           | 1.420   |          | 1.926         | 1.277   |         |
| 1446 | <i>Agtr2</i>   | ns             | 3.75   | ns      | ns       |                 | 1.048   |          | 0.801         |         |         |

**Supplementary Table S2.** Transcriptional expression overlap between our TC data and published data derived from human OA biopsies including: articular cartilage , osteophyte (calcified cartilage), synovium, meniscus and subchondral bone. Values represented are log2 fold changes. For all comparisons made genes were accepted based on  $p < 0.05$  and adjusted  $p < 0.1$ ; for meniscus dataset only, genes were selected based on  $p < 0.05$ .

|     |                  | TC (mouse) |        |         |          | OA (human) |            |         |        |           |          |
|-----|------------------|------------|--------|---------|----------|------------|------------|---------|--------|-----------|----------|
|     |                  |            |        |         |          | Tibia      |            |         |        |           |          |
| No. | Gene Name        | 1 Day      | 1 Week | 6 Weeks | 12 Weeks | Synovium   | Osteophyte | Lateral | Medial | Cartilage | Meniscus |
| 1   | <i>Fyb</i>       | ns         | ns     | 1.088   | ns       |            | ns         | ns      | ns     | ns        | ns       |
| 2   | <i>Cd68</i>      | 0.591      | ns     | ns      | ns       |            | ns         | ns      | ns     | ns        | ns       |
| 3   | <i>Pla2g4a</i>   | ns         | ns     | 1.533   | ns       |            | ns         | ns      | ns     | ns        | ns       |
| 4   | <i>Lilrb4</i>    | ns         | ns     | 1.658   | ns       |            | ns         | ns      | ns     | ns        | ns       |
| 5   | <i>Fcgr2b</i>    | 0.83       | ns     | 0.991   | ns       |            | ns         | ns      | ns     | ns        | ns       |
| 6   | <i>Tsku</i>      | ns         | 0.885  | ns      | ns       |            | ns         | ns      | ns     | ns        | ns       |
| 7   | <i>Gfpt2</i>     | ns         | 0.77   | 0.866   | ns       |            | ns         | ns      | ns     | ns        | ns       |
| 8   | <i>C1qtnf1</i>   | ns         | 1.437  | ns      | ns       |            | ns         | ns      | ns     | ns        | ns       |
| 9   | <i>Pmepa1</i>    | 0.892      | 1.1    | ns      | ns       |            | ns         | ns      | ns     | ns        | ns       |
| 10  | <i>Pdk4</i>      | 0.929      | ns     | ns      | ns       |            | ns         | ns      | ns     | ns        | ns       |
| 11  | <i>Klhl13</i>    | ns         | 0.869  | ns      | ns       |            | ns         | ns      | ns     | ns        | ns       |
| 12  | <i>Cxcl1</i>     | 2.808      | ns     | ns      | ns       |            | ns         | ns      | ns     | ns        | ns       |
| 13  | <i>Cxcl16</i>    | 1.766      | 0.93   | ns      | ns       |            | ns         | ns      | ns     | ns        | ns       |
| 14  | <i>Cd14</i>      | 1.058      | 0.74   | ns      | ns       |            | ns         | ns      | ns     | ns        | ns       |
| 15  | <i>Tipi2</i>     | ns         | 1.083  | ns      | ns       |            | ns         | ns      | ns     | ns        | ns       |
| 16  | <i>C1qc</i>      | 0.803      | ns     | ns      | 1.345    |            | ns         | ns      | ns     | ns        | ns       |
| 17  | <i>Cxcl5</i>     | 2.723      | ns     | ns      | ns       |            | ns         | ns      | ns     | ns        | ns       |
| 18  | <i>Lbp</i>       | ns         | ns     | 1.01    | 1.201    |            | ns         | ns      | ns     | ns        | ns       |
| 19  | <i>Fhl1</i>      | ns         | -0.812 | ns      | ns       |            | ns         | ns      | ns     | ns        | ns       |
| 20  | <i>Hapln1</i>    | -0.594     | ns     | 1.649   | ns       |            | ns         | ns      | ns     | ns        | ns       |
| 21  | <i>Ednrb</i>     | 0.634      | ns     | ns      | ns       |            | ns         | ns      | ns     | ns        | ns       |
| 22  | <i>Adap2</i>     | 0.617      | ns     | ns      | ns       |            | ns         | ns      | ns     | ns        | ns       |
| 23  | <i>C3ar1</i>     | 2.506      | 1.414  | ns      | ns       |            | ns         | ns      | ns     | ns        | ns       |
| 24  | <i>Folr2</i>     | 0.724      | 0.707  | ns      | ns       |            | ns         | ns      | ns     | ns        | ns       |
| 25  | <i>Npl</i>       | 0.63       | ns     | ns      | 0.973    |            | ns         | ns      | ns     | ns        | ns       |
| 26  | <i>Hbegf</i>     | ns         | 0.691  | 1.052   | 1.284    |            | ns         | ns      | ns     | ns        | ns       |
| 27  | <i>C1qa</i>      | 0.764      | ns     | ns      | 0.771    |            | ns         | ns      | ns     | ns        | ns       |
| 28  | <i>ApoE</i>      | 0.963      | ns     | ns      | ns       |            | ns         | ns      | ns     | ns        | ns       |
| 29  | <i>C1qb</i>      | 0.921      | ns     | ns      | ns       |            | ns         | ns      | ns     | ns        | ns       |
| 30  | <i>Has1</i>      | 1.728      | 2.337  | ns      | ns       |            | ns         | ns      | ns     | ns        | ns       |
| 31  | <i>Gpr34</i>     | 0.848      | ns     | ns      | ns       |            | ns         | ns      | ns     | ns        | ns       |
| 32  | <i>Rnase6</i>    | ns         | ns     | 0.679   | ns       |            | ns         | ns      | ns     | ns        | ns       |
| 33  | <i>Ms4a7</i>     | 1.803      | 0.886  | ns      | ns       |            | ns         | ns      | ns     | ns        | ns       |
| 34  | <i>UbtD2</i>     | ns         | 0.692  | ns      | ns       | ns         |            | ns      | ns     | ns        | ns       |
| 35  | <i>Rin2</i>      | ns         | 0.906  | ns      | ns       | ns         |            | ns      | ns     | ns        | ns       |
| 36  | <i>Zc3hav1</i>   | ns         | ns     | 1.061   | ns       | ns         |            | ns      | ns     | ns        | ns       |
| 37  | <i>Casp8</i>     | ns         | ns     | 0.788   | ns       | ns         |            | ns      | ns     | ns        | ns       |
| 38  | <i>Antxr1</i>    | ns         | 1.752  | 1.888   | 1.086    | ns         |            | ns      | ns     | ns        | ns       |
| 39  | <i>Atad2</i>     | ns         | ns     | 1.081   | ns       | ns         |            | ns      | ns     | ns        | ns       |
| 40  | <i>Smc4</i>      | ns         | ns     | 1.423   | ns       | ns         |            | ns      | ns     | ns        | ns       |
| 41  | <i>Med28</i>     | ns         | ns     | ns      | 0.876    | ns         |            | ns      | ns     | ns        | ns       |
| 42  | <i>Itpr1p</i>    | ns         | ns     | ns      | 1.099    | ns         |            | ns      | ns     | ns        | ns       |
| 43  | <i>Pth1r</i>     | ns         | ns     | 0.619   | ns       | ns         |            | ns      | ns     | ns        | ns       |
| 44  | <i>Cd33</i>      | ns         | ns     | 1.242   | ns       | ns         |            | ns      | ns     | ns        | ns       |
| 45  | <i>Cep135</i>    | ns         | ns     | 1.629   | ns       | ns         |            | ns      | ns     | ns        | ns       |
| 46  | <i>Adam10</i>    | ns         | ns     | 0.948   | ns       | ns         |            | ns      | ns     | ns        | ns       |
| 47  | <i>Cybb</i>      | ns         | ns     | 1.31    | ns       | ns         |            | ns      | ns     | ns        | ns       |
| 48  | <i>Lrrc32</i>    | 0.664      | ns     | ns      | ns       | ns         |            | ns      | ns     | ns        | ns       |
| 49  | <i>Mecom</i>     | 0.933      | ns     | ns      | ns       | ns         |            | ns      | ns     | ns        | ns       |
| 50  | <i>Pcsk5</i>     | 1.778      | 0.871  | ns      | ns       | ns         |            | ns      | ns     | ns        | ns       |
| 51  | <i>Socs3</i>     | 1.287      | 0.837  | ns      | ns       | ns         |            | ns      | ns     | ns        | ns       |
| 52  | <i>Cttnbp2nl</i> | 0.945      | ns     | ns      | ns       | ns         |            | ns      | ns     | ns        | ns       |
| 53  | <i>Ikbip</i>     | 0.619      | 0.892  | 0.928   | ns       | ns         |            | ns      | ns     | ns        | ns       |
| 54  | <i>Lgals1</i>    | 0.992      | 0.758  | ns      | ns       | ns         |            | ns      | ns     | ns        | ns       |
| 55  | <i>Twf1</i>      | ns         | ns     | 1.053   | ns       | ns         |            | ns      | ns     | ns        | ns       |



|     |                  |       |       |       |       |    |    |    |    |    |
|-----|------------------|-------|-------|-------|-------|----|----|----|----|----|
| 56  | <i>Myof</i>      | 1.077 | 1.296 | 1.06  | ns    | ns | ns | ns | ns | ns |
| 57  | <i>Clec11a</i>   | 0.662 | 0.851 | 1.865 | ns    | ns | ns | ns | ns | ns |
| 58  | <i>Lhfp12</i>    | ns    | 0.794 | ns    | ns    | ns | ns | ns | ns | ns |
| 59  | <i>Cep152</i>    | ns    | ns    | 1.277 | ns    | ns | ns | ns | ns | ns |
| 60  | <i>Fbxo32</i>    | 1.487 | ns    | ns    | ns    | ns | ns | ns | ns | ns |
| 61  | <i>Man2a1</i>    | 0.583 | ns    | ns    | ns    | ns | ns | ns | ns | ns |
| 62  | <i>Top2a</i>     | ns    | ns    | 1.305 | ns    | ns | ns | ns | ns | ns |
| 63  | <i>Snx7</i>      | 0.692 | 1.057 | 1.347 | ns    | ns | ns | ns | ns | ns |
| 64  | <i>Cmklr1</i>    | 0.633 | ns    | ns    | ns    | ns | ns | ns | ns | ns |
| 65  | <i>Fkbp14</i>    | ns    | 0.997 | ns    | ns    | ns | ns | ns | ns | ns |
| 66  | <i>Lamc1</i>     | ns    | 0.701 | ns    | ns    | ns | ns | ns | ns | ns |
| 67  | <i>Clec10a</i>   | ns    | ns    | ns    | 1.498 | ns | ns | ns | ns | ns |
| 68  | <i>Nfatc4</i>    | 1.044 | 1.484 | ns    | ns    | ns | ns | ns | ns | ns |
| 69  | <i>Selplg</i>    | ns    | ns    | ns    | 0.746 | ns | ns | ns | ns | ns |
| 70  | <i>Rapgef6</i>   | ns    | ns    | 1.206 | ns    | ns | ns | ns | ns | ns |
| 71  | <i>Fbln2</i>     | 2.251 | 1.431 | ns    | ns    | ns | ns | ns | ns | ns |
| 72  | <i>Far1</i>      | ns    | ns    | 0.932 | ns    | ns | ns | ns | ns | ns |
| 73  | <i>Depdc7</i>    | 0.681 | ns    | ns    | ns    | ns | ns | ns | ns | ns |
| 74  | <i>Prrg1</i>     | 0.585 | ns    | ns    | ns    | ns | ns | ns | ns | ns |
| 75  | <i>Ctsg</i>      | ns    | ns    | ns    | 0.736 | ns | ns | ns | ns | ns |
| 76  | <i>Slc41a2</i>   | 0.978 | 1.143 | ns    | ns    | ns | ns | ns | ns | ns |
| 77  | <i>Nox4</i>      | 1.497 | 1.284 | ns    | ns    | ns | ns | ns | ns | ns |
| 78  | <i>Pik3r3</i>    | ns    | 0.6   | ns    | ns    | ns | ns | ns | ns | ns |
| 79  | <i>Grb10</i>     | 0.844 | 1.259 | ns    | ns    | ns | ns | ns | ns | ns |
| 80  | <i>Smchd1</i>    | ns    | ns    | 1.024 | ns    | ns | ns | ns | ns | ns |
| 81  | <i>Fstl1</i>     | 1.506 | 1.773 | 0.947 | ns    | ns | ns | ns | ns | ns |
| 82  | <i>Tnn</i>       | 1.429 | 2.076 | 1.666 | 1.595 | ns | ns | ns | ns | ns |
| 83  | <i>Tnfrsf11a</i> | 0.759 | ns    | ns    | ns    | ns | ns | ns | ns | ns |
| 84  | <i>Dbn1</i>      | 0.914 | 1.295 | ns    | ns    | ns | ns | ns | ns | ns |
| 85  | <i>Efh2</i>      | ns    | ns    | ns    | 1.126 | ns | ns | ns | ns | ns |
| 86  | <i>Adam9</i>     | 0.873 | ns    | ns    | ns    | ns | ns | ns | ns | ns |
| 87  | <i>Fzd1</i>      | 0.978 | 0.786 | ns    | ns    | ns | ns | ns | ns | ns |
| 88  | <i>Chml</i>      | ns    | ns    | 1.602 | ns    | ns | ns | ns | ns | ns |
| 89  | <i>Myo5a</i>     | ns    | ns    | 1.157 | ns    | ns | ns | ns | ns | ns |
| 90  | <i>Ggt5</i>      | 0.586 | ns    | ns    | ns    | ns | ns | ns | ns | ns |
| 91  | <i>Il7r</i>      | ns    | ns    | 1.51  | ns    | ns | ns | ns | ns | ns |
| 92  | <i>Coro1a</i>    | ns    | ns    | ns    | 1.176 | ns | ns | ns | ns | ns |
| 93  | <i>Igsf10</i>    | 1.037 | 1.848 | ns    | ns    | ns | ns | ns | ns | ns |
| 94  | <i>Tpst2</i>     | ns    | ns    | ns    | 1.017 | ns | ns | ns | ns | ns |
| 95  | <i>Sema3c</i>    | ns    | 0.899 | ns    | ns    | ns | ns | ns | ns | ns |
| 96  | <i>Sfrp2</i>     | 1.772 | 2.205 | 1.668 | 1.599 | ns | ns | ns | ns | ns |
| 97  | <i>B4galt5</i>   | 0.679 | ns    | ns    | ns    | ns | ns | ns | ns | ns |
| 98  | <i>Msr1</i>      | 1.736 | ns    | ns    | ns    | ns | ns | ns | ns | ns |
| 99  | <i>Plvap</i>     | ns    | ns    | ns    | 1.208 | ns | ns | ns | ns | ns |
| 100 | <i>Fam198b</i>   | ns    | 0.695 | ns    | ns    | ns | ns | ns | ns | ns |
| 101 | <i>Marcks1</i>   | ns    | ns    | ns    | 1.105 | ns | ns | ns | ns | ns |
| 102 | <i>Olfml1</i>    | ns    | 1.198 | ns    | ns    | ns | ns | ns | ns | ns |
| 103 | <i>Hpgds</i>     | 0.588 | ns    | ns    | ns    | ns | ns | ns | ns | ns |
| 104 | <i>Ctsk</i>      | ns    | ns    | 0.781 | ns    | ns | ns | ns | ns | ns |
| 105 | <i>Fam102b</i>   | ns    | 0.625 | ns    | ns    | ns | ns | ns | ns | ns |
| 106 | <i>Adamts2</i>   | ns    | ns    | 0.745 | ns    | ns | ns | ns | ns | ns |
| 107 | <i>Stmn2</i>     | 0.697 | ns    | ns    | ns    | ns | ns | ns | ns | ns |
| 108 | <i>Dclk1</i>     | 1.786 | 1.667 | ns    | ns    | ns | ns | ns | ns | ns |
| 109 | <i>Slco2a1</i>   | ns    | 0.71  | ns    | ns    | ns | ns | ns | ns | ns |
| 110 | <i>Cd84</i>      | ns    | ns    | 1.169 | ns    | ns | ns | ns | ns | ns |
| 111 | <i>Ptprc</i>     | ns    | ns    | 1.162 | ns    | ns | ns | ns | ns | ns |
| 112 | <i>Arl4c</i>     | 1.141 | 0.652 | ns    | ns    | ns | ns | ns | ns | ns |
| 113 | <i>Igsf6</i>     | ns    | ns    | 1.446 | ns    | ns | ns | ns | ns | ns |
| 114 | <i>Dock10</i>    | ns    | ns    | 1.366 | ns    | ns | ns | ns | ns | ns |
| 115 | <i>Ecscr</i>     | 0.757 | ns    | ns    | ns    | ns | ns | ns | ns | ns |
| 116 | <i>Iqgap2</i>    | ns    | ns    | 1.388 | ns    | ns | ns | ns | ns | ns |
| 117 | <i>Lyst</i>      | ns    | ns    | 1.212 | ns    | ns | ns | ns | ns | ns |
| 118 | <i>Aplnr</i>     | 0.752 | 0.699 | ns    | ns    | ns | ns | ns | ns | ns |
| 119 | <i>Tnc</i>       | ns    | 0.829 | ns    | ns    | ns | ns | ns | ns | ns |
| 120 | <i>Gpr183</i>    | 0.785 | ns    | ns    | ns    | ns | ns | ns | ns | ns |
| 121 | <i>Map1b</i>     | 0.751 | ns    | ns    | ns    | ns | ns | ns | ns | ns |
| 122 | <i>Atp8b1</i>    | 1.006 | 0.901 | ns    | ns    | ns | ns | ns | ns | ns |

|     |                 |        |       |        |       |    |    |    |    |    |
|-----|-----------------|--------|-------|--------|-------|----|----|----|----|----|
| 123 | <i>Mnda</i>     | 0.849  | ns    | 1.307  | ns    | ns | ns | ns | ns | ns |
| 124 | <i>Rgs1</i>     | 0.779  | ns    | ns     | ns    | ns | ns | ns | ns | ns |
| 125 | <i>Fam13c</i>   | 0.688  | ns    | ns     | ns    | ns | ns | ns | ns | ns |
| 126 | <i>Nid1</i>     | ns     | 0.804 | ns     | ns    | ns | ns | ns | ns | ns |
| 127 | <i>Mrc1</i>     | ns     | ns    | 0.894  | ns    | ns | ns | ns | ns | ns |
| 128 | <i>Plk2</i>     | 0.634  | ns    | ns     | ns    | ns | ns | ns | ns | ns |
| 129 | <i>Gjc1</i>     | 0.657  | ns    | ns     | ns    | ns | ns | ns | ns | ns |
| 130 | <i>Vgll3</i>    | 2.125  | 1.482 | ns     | ns    | ns | ns | ns | ns | ns |
| 131 | <i>Col4a1</i>   | ns     | 0.653 | ns     | ns    | ns | ns | ns | ns | ns |
| 132 | <i>Phldb2</i>   | 0.942  | ns    | ns     | ns    | ns | ns | ns | ns | ns |
| 133 | <i>Col8a1</i>   | 0.871  | 1.106 | 0.772  | ns    | ns | ns | ns | ns | ns |
| 134 | <i>Srpx</i>     | ns     | 0.775 | ns     | ns    | ns | ns | ns | ns | ns |
| 135 | <i>Mmp13</i>    | ns     | ns    | 1.573  | ns    | ns | ns | ns | ns | ns |
| 136 | <i>Gpnmb</i>    | 0.914  | 0.865 | ns     | ns    | ns | ns | ns | ns | ns |
| 137 | <i>Plau</i>     | 0.963  | ns    | ns     | ns    | ns | ns | ns | ns | ns |
| 138 | <i>Vcan</i>     | 1.402  | 1.655 | 1.42   | ns    | ns | ns | ns | ns | ns |
| 139 | <i>Tgfb1</i>    | 1.169  | 0.866 | ns     | 1.146 | ns | ns | ns | ns | ns |
| 140 | <i>Nbl1</i>     | ns     | 1.421 | ns     | 1.642 | ns | ns | ns | ns | ns |
| 141 | <i>Abi3bp</i>   | ns     | 1.264 | 2.207  | ns    | ns | ns | ns | ns | ns |
| 142 | <i>Gas1</i>     | ns     | 1.257 | ns     | ns    | ns | ns | ns | ns | ns |
| 143 | <i>Igfbp4</i>   | ns     | 0.748 | ns     | ns    | ns | ns | ns | ns | ns |
| 144 | <i>Col6a2</i>   | 1.071  | 2.108 | 1.266  | 1.489 | ns | ns | ns | ns | ns |
| 145 | <i>Igfbp6</i>   | ns     | 0.703 | ns     | ns    | ns | ns | ns | ns | ns |
| 146 | <i>Igfbp3</i>   | ns     | 0.795 | ns     | ns    | ns | ns | ns | ns | ns |
| 147 | <i>Col15a1</i>  | ns     | 1.182 | 0.942  | ns    | ns | ns | ns | ns | ns |
| 148 | <i>Slc39a14</i> | 1.276  | 0.992 | ns     | ns    | ns | ns | ns | ns | ns |
| 149 | <i>Ntn1</i>     | ns     | 0.749 | ns     | ns    | ns | ns | ns | ns | ns |
| 150 | <i>Tspan2</i>   | ns     | 0.73  | ns     | ns    | ns | ns | ns | ns | ns |
| 151 | <i>Serpine1</i> | 3.03   | 1.955 | ns     | ns    | ns | ns | ns | ns | ns |
| 152 | <i>Atp8b2</i>   | ns     | 0.826 | ns     | ns    | ns | ns | ns | ns | ns |
| 153 | <i>Nt5e</i>     | 0.76   | 1.06  | 1.029  | ns    | ns | ns | ns | ns | ns |
| 154 | <i>Loxl3</i>    | 1.276  | 1.349 | ns     | ns    | ns | ns | ns | ns | ns |
| 155 | <i>Anxa8</i>    | ns     | 1.654 | 2.452  | 2.056 | ns | ns | ns | ns | ns |
| 156 | <i>Atp9a</i>    | 0.812  | ns    | -0.685 | ns    | ns | ns | ns | ns | ns |
| 157 | <i>Timp1</i>    | 2.32   | 1.512 | ns     | ns    | ns | ns | ns | ns | ns |
| 158 | <i>Sec24d</i>   | 0.606  | 0.862 | ns     | ns    | ns | ns | ns | ns | ns |
| 159 | <i>Pdia5</i>    | 1.022  | 0.921 | ns     | ns    | ns | ns | ns | ns | ns |
| 160 | <i>Mapt</i>     | ns     | -0.77 | ns     | ns    | ns | ns | ns | ns | ns |
| 161 | <i>Kdelr2</i>   | 0.727  | ns    | ns     | ns    | ns | ns | ns | ns | ns |
| 162 | <i>Mfap4</i>    | 1.083  | 1.861 | ns     | ns    | ns | ns | ns | ns | ns |
| 163 | <i>Cep55</i>    | ns     | ns    | 1.565  | ns    | ns | ns | ns | ns | ns |
| 164 | <i>Klhl30</i>   | ns     | ns    | -0.957 | ns    | ns | ns | ns | ns | ns |
| 165 | <i>Fam57a</i>   | 1.572  | 1.363 | ns     | ns    | ns | ns | ns | ns | ns |
| 166 | <i>Gpx7</i>     | 1.462  | 1.312 | ns     | ns    | ns | ns | ns | ns | ns |
| 167 | <i>Plekhg5</i>  | ns     | 0.654 | ns     | ns    | ns | ns | ns | ns | ns |
| 168 | <i>Plcd4</i>    | -0.688 | ns    | ns     | ns    | ns | ns | ns | ns | ns |
| 169 | <i>Cpxm1</i>    | ns     | 1.502 | ns     | ns    | ns | ns | ns | ns | ns |
| 170 | <i>Bmp1</i>     | ns     | 0.763 | 0.67   | ns    | ns | ns | ns | ns | ns |
| 171 | <i>Capn6</i>    | 0.688  | 1.773 | ns     | ns    | ns | ns | ns | ns | ns |
| 172 | <i>Fkbp7</i>    | ns     | 0.912 | 1.353  | ns    | ns | ns | ns | ns | ns |
| 173 | <i>Cilp2</i>    | -0.593 | ns    | ns     | ns    | ns | ns | ns | ns | ns |
| 174 | <i>Tpst1</i>    | ns     | ns    | ns     | 0.995 | ns | ns | ns | ns | ns |
| 175 | <i>Tceal7</i>   | -0.907 | ns    | ns     | ns    | ns | ns | ns | ns | ns |
| 176 | <i>Igdcc4</i>   | 0.755  | ns    | ns     | ns    | ns | ns | ns | ns | ns |
| 177 | <i>Mmp14</i>    | ns     | 1.287 | 1.026  | ns    | ns | ns | ns | ns | ns |
| 178 | <i>Trem2</i>    | 2.229  | 0.996 | ns     | ns    | ns | ns | ns | ns | ns |
| 179 | <i>Tmem45a</i>  | 0.78   | 1.498 | ns     | ns    | ns | ns | ns | ns | ns |
| 180 | <i>Ptgfrn</i>   | 0.986  | 1.437 | ns     | ns    | ns | ns | ns | ns | ns |
| 181 | <i>Serpinh1</i> | 0.937  | 0.834 | ns     | 1.64  | ns | ns | ns | ns | ns |
| 182 | <i>Slamf9</i>   | 0.812  | ns    | ns     | ns    | ns | ns | ns | ns | ns |
| 183 | <i>P4ha2</i>    | 0.81   | 1.071 | ns     | ns    | ns | ns | ns | ns | ns |
| 184 | <i>Cd276</i>    | ns     | 1.133 | ns     | ns    | ns | ns | ns | ns | ns |
| 185 | <i>Aebp1</i>    | 0.939  | 1.41  | ns     | ns    | ns | ns | ns | ns | ns |
| 186 | <i>Prrx2</i>    | 1.938  | 1.909 | ns     | ns    | ns | ns | ns | ns | ns |
| 187 | <i>Dapl1</i>    | ns     | ns    | ns     | 2.358 | ns | ns | ns | ns | ns |
| 188 | <i>Col18a1</i>  | 1.197  | 1.696 | ns     | ns    | ns | ns | ns | ns | ns |
| 189 | <i>Copz2</i>    | ns     | 0.698 | ns     | ns    | ns | ns | ns | ns | ns |

|     |                  |        |        |       |       |    |    |    |    |    |
|-----|------------------|--------|--------|-------|-------|----|----|----|----|----|
| 190 | <i>Edil3</i>     | ns     | 1.038  | 1.202 | ns    | ns | ns |    | ns | ns |
| 191 | <i>Math3</i>     | -0.922 | ns     | ns    | ns    | ns | ns |    | ns | ns |
| 192 | <i>Pcolce</i>    | 0.709  | 1.094  | ns    | 0.906 | ns | ns |    | ns | ns |
| 193 | <i>S100a4</i>    | 1.215  | 0.655  | ns    | 1.145 | ns | ns |    | ns | ns |
| 194 | <i>Prrx1</i>     | 0.671  | 0.726  | ns    | ns    | ns | ns |    | ns | ns |
| 195 | <i>Fkbp10</i>    | 0.727  | 1.014  | ns    | ns    | ns | ns |    | ns | ns |
| 196 | <i>Gpx8</i>      | ns     | 0.788  | ns    | ns    | ns | ns |    | ns | ns |
| 197 | <i>Col6a1</i>    | 1.05   | 2.06   | 1.196 | 1.284 | ns | ns |    | ns | ns |
| 198 | <i>Cercam</i>    | ns     | 0.739  | ns    | ns    | ns | ns |    | ns | ns |
| 199 | <i>Pdgfr1</i>    | ns     | 1.125  | ns    | ns    | ns | ns |    | ns | ns |
| 200 | <i>Tgfb3</i>     | 0.691  | 0.846  | ns    | ns    | ns | ns |    | ns | ns |
| 201 | <i>Homer2</i>    | ns     | -0.655 | ns    | ns    | ns | ns |    | ns | ns |
| 202 | <i>Ecm1</i>      | 0.603  | 1.183  | ns    | ns    | ns | ns |    | ns | ns |
| 203 | <i>Lum</i>       | ns     | 1.428  | 2.203 | ns    | ns | ns |    | ns | ns |
| 204 | <i>Col5a2</i>    | 1.038  | 1.53   | 1.435 | 1.408 | ns | ns |    | ns | ns |
| 205 | <i>Ssc5d</i>     | ns     | 2.256  | 1.229 | ns    | ns | ns |    | ns | ns |
| 206 | <i>Ifitm5</i>    | ns     | -0.669 | ns    | ns    | ns | ns |    | ns | ns |
| 207 | <i>Crabp2</i>    | 2.132  | 2.925  | ns    | ns    | ns | ns |    | ns | ns |
| 208 | <i>Postn</i>     | 1.856  | 1.925  | 1.167 | ns    | ns | ns |    | ns | ns |
| 209 | <i>Dkk3</i>      | 0.648  | 1.848  | ns    | ns    | ns | ns |    | ns | ns |
| 210 | <i>Cthrc1</i>    | 1.935  | 2.337  | 0.894 | 1.548 | ns | ns |    | ns | ns |
| 211 | <i>Fap</i>       | ns     | ns     | 1.734 | ns    | ns | ns |    | ns | ns |
| 212 | <i>Cys1</i>      | ns     | 0.973  | ns    | ns    | ns | ns |    | ns | ns |
| 213 | <i>Fndc1</i>     | 1.067  | 2.223  | 1.297 | ns    | ns | ns |    | ns | ns |
| 214 | <i>Col3a1</i>    | 2.037  | 2.522  | 2.017 | 1.976 | ns | ns |    | ns | ns |
| 215 | <i>Aspn</i>      | 1.156  | 2.012  | 1.904 | ns    | ns | ns |    | ns | ns |
| 216 | <i>Col2a1</i>    | ns     | ns     | 1.607 | ns    | ns | ns |    | ns | ns |
| 217 | <i>Nova1</i>     | ns     | 0.74   | ns    | ns    | ns | ns | ns | ns |    |
| 218 | <i>Ndufa4l2</i>  | ns     | 1.016  | ns    | ns    | ns | ns | ns | ns |    |
| 219 | <i>Avpi1</i>     | 0.684  | ns     | ns    | ns    | ns | ns | ns | ns |    |
| 220 | <i>Eln</i>       | 1.406  | 1.648  | ns    | ns    | ns | ns | ns | ns |    |
| 221 | <i>Igfbp7</i>    | 0.715  | 0.908  | ns    | ns    | ns | ns | ns | ns |    |
| 222 | <i>Medag</i>     | 1.053  | 1.907  | 1.091 | ns    | ns | ns | ns | ns |    |
| 223 | <i>Col22a1</i>   | ns     | ns     | 1.352 | ns    |    |    |    | ns | ns |
| 224 | <i>Ccl2</i>      | 3.556  | ns     | ns    | ns    |    |    |    | ns | ns |
| 225 | <i>Spp1</i>      | ns     | ns     | 1.481 | ns    |    |    | ns | ns | ns |
| 226 | <i>Il6</i>       | 2.588  | ns     | ns    | ns    |    |    | ns | ns | ns |
| 227 | <i>Fgl2</i>      | ns     | ns     | 0.962 | ns    |    |    | ns | ns |    |
| 228 | <i>Ctss</i>      | 1.084  | ns     | ns    | ns    |    |    | ns | ns | ns |
| 229 | <i>Aif1</i>      | 0.735  | ns     | ns    | ns    |    |    | ns | ns | ns |
| 230 | <i>Fos</i>       | 0.825  | 0.735  | ns    | ns    |    |    | ns | ns | ns |
| 231 | <i>Nr4a2</i>     | ns     | 1.283  | ns    | ns    |    |    | ns | ns | ns |
| 232 | <i>Tnfrsf10b</i> | 2.258  | 1.985  | ns    | ns    | ns |    |    |    | ns |
| 233 | <i>Pid1</i>      | 0.778  | ns     | ns    | ns    |    |    |    |    | ns |
| 234 | <i>Rcan1</i>     | 0.674  | ns     | ns    | ns    |    |    |    |    | ns |
| 235 | <i>Slc7a2</i>    | ns     | 0.851  | ns    | ns    |    |    |    |    | ns |
| 236 | <i>Srpx2</i>     | 1.145  | 1.555  | 1.337 | 1.312 |    |    |    |    | ns |
| 237 | <i>Ier3</i>      | 0.854  | 0.63   | ns    | ns    |    |    |    |    | ns |
| 238 | <i>Adss1</i>     | ns     | -0.674 | ns    | ns    |    |    |    |    | ns |
| 239 | <i>Baiap2</i>    | 0.6    | 1.038  | ns    | ns    |    |    |    |    | ns |
| 240 | <i>Mmp3</i>      | 2.156  | 2.506  | 3.554 | 2.618 |    |    |    |    | ns |
| 241 | <i>Lrrc2</i>     | 0.7    | -0.772 | ns    | ns    | ns |    |    |    | ns |
| 242 | <i>Sfrp1</i>     | 2.301  | 1.988  | ns    | ns    |    |    |    |    | ns |
| 243 | <i>Csrp2</i>     | 1.816  | 1.449  | ns    | ns    |    |    |    |    | ns |
| 244 | <i>Siglec1</i>   | 0.674  | ns     | ns    | ns    |    |    |    |    | ns |
| 245 | <i>Mepe</i>      | ns     | ns     | 0.725 | ns    |    |    |    |    | ns |
| 246 | <i>Ndc80</i>     | ns     | ns     | 1.424 | ns    |    |    |    |    | ns |
| 247 | <i>Plat</i>      | 1.092  | 1.039  | 1.101 | ns    |    |    |    |    | ns |
| 248 | <i>Ccl8</i>      | 1.605  | 1.85   | ns    | ns    |    |    |    |    | ns |
| 249 | <i>Dmp1</i>      | ns     | ns     | 1.668 | ns    |    |    |    |    | ns |
| 250 | <i>Creb3l1</i>   | ns     | ns     | 0.817 | ns    |    |    |    |    | ns |
| 251 | <i>Atp6v0d2</i>  | ns     | ns     | 1.881 | ns    |    |    |    |    | ns |
| 252 | <i>Rab23</i>     | 0.855  | 0.689  | ns    | ns    |    |    |    |    | ns |
| 253 | <i>Ppic</i>      | ns     | 1.035  | ns    | ns    |    |    |    |    | ns |
| 254 | <i>Slitrk6</i>   | ns     | 0.692  | ns    | ns    |    |    |    |    | ns |
| 255 | <i>Gja1</i>      | ns     | ns     | 1.12  | ns    |    |    |    |    | ns |
| 256 | <i>Tmem158</i>   | ns     | 0.625  | ns    | ns    |    |    |    |    | ns |

|     |                 |        |        |       |       |    |  |  |    |    |
|-----|-----------------|--------|--------|-------|-------|----|--|--|----|----|
| 257 | <i>Alpl</i>     | ns     | ns     | 0.701 | ns    | ns |  |  | ns | ns |
| 258 | <i>Angptl1</i>  | 1.19   | 2.48   | 1.591 | ns    | ns |  |  | ns | ns |
| 259 | <i>Prss23</i>   | 0.656  | ns     | ns    | ns    | ns |  |  | ns | ns |
| 260 | <i>Angpt2</i>   | ns     | ns     | 1.264 | ns    | ns |  |  | ns | ns |
| 261 | <i>Itga11</i>   | ns     | 1.311  | ns    | ns    | ns |  |  | ns | ns |
| 262 | <i>Bend6</i>    | 0.909  | 0.598  | ns    | ns    | ns |  |  | ns | ns |
| 263 | <i>Tpbp</i>     | 0.733  | ns     | ns    | ns    | ns |  |  | ns | ns |
| 264 | <i>Col1a2</i>   | ns     | ns     | 0.599 | ns    | ns |  |  | ns | ns |
| 265 | <i>Gxylt2</i>   | ns     | 0.78   | ns    | ns    | ns |  |  | ns | ns |
| 266 | <i>Cdh2</i>     | ns     | ns     | 0.869 | ns    | ns |  |  | ns | ns |
| 267 | <i>Olfml2b</i>  | ns     | 0.711  | ns    | 1.304 | ns |  |  | ns | ns |
| 268 | <i>Sgms2</i>    | ns     | ns     | 0.905 | ns    | ns |  |  | ns | ns |
| 269 | <i>Tmem119</i>  | ns     | 0.628  | 1.351 | ns    | ns |  |  | ns | ns |
| 270 | <i>C1qtnf6</i>  | 0.593  | 1.483  | ns    | ns    | ns |  |  | ns | ns |
| 271 | <i>Bicc1</i>    | 0.735  | 0.908  | ns    | ns    | ns |  |  | ns | ns |
| 272 | <i>Lrrc17</i>   | 1.637  | 0.971  | ns    | ns    | ns |  |  | ns | ns |
| 273 | <i>Thy1</i>     | 1.076  | 1.321  | 1.121 | 1.335 | ns |  |  | ns | ns |
| 274 | <i>Ednra</i>    | ns     | 0.777  | ns    | ns    | ns |  |  |    | ns |
| 275 | <i>Mmp2</i>     | ns     | 1.715  | 1.752 | 1.46  | ns |  |  |    | ns |
| 276 | <i>Thbs2</i>    | 1.204  | 1.893  | 1.006 | ns    | ns |  |  |    | ns |
| 277 | <i>Nid2</i>     | ns     | 0.854  | ns    | ns    | ns |  |  |    | ns |
| 278 | <i>Lrrc15</i>   | 0.852  | 1.961  | ns    | ns    | ns |  |  |    | ns |
| 279 | <i>Smpd3</i>    | ns     | ns     | 0.921 | ns    | ns |  |  |    | ns |
| 280 | <i>Aldh1l2</i>  | 1.09   | 0.781  | ns    | ns    |    |  |  | ns | ns |
| 281 | <i>Cxcl14</i>   | 1.057  | ns     | ns    | 1.255 | ns |  |  |    | ns |
| 282 | <i>Pamr1</i>    | -0.812 | 1.945  | 1.265 | 1.27  | ns |  |  |    | ns |
| 283 | <i>Kcne4</i>    | 1.722  | 1.287  | ns    | ns    | ns |  |  |    | ns |
| 284 | <i>Spats2l</i>  | ns     | 0.696  | ns    | ns    | ns |  |  | ns |    |
| 285 | <i>Emp1</i>     | 1.017  | 1.212  | 0.903 | ns    | ns |  |  |    |    |
| 286 | <i>Moxd1</i>    | ns     | 2.79   | ns    | ns    | ns |  |  |    | ns |
| 287 | <i>Col5a3</i>   | 1.043  | 1.457  | 1.122 | ns    | ns |  |  |    | ns |
| 288 | <i>Mfap5</i>    | 1.355  | 1.881  | ns    | ns    | ns |  |  |    | ns |
| 289 | <i>Igfbp5</i>   | ns     | 0.663  | ns    | ns    | ns |  |  |    | ns |
| 290 | <i>Cyp1b1</i>   | ns     | ns     | 0.775 | ns    | ns |  |  |    |    |
| 291 | <i>Sfrp4</i>    | ns     | 0.692  | 1.342 | ns    | ns |  |  |    |    |
| 292 | <i>Sh3pxd2b</i> | ns     | 0.9    | ns    | ns    | ns |  |  |    | ns |
| 293 | <i>Cdh11</i>    | ns     | ns     | 1.155 | ns    | ns |  |  |    | ns |
| 294 | <i>Tmtc4</i>    | 0.727  | ns     | ns    | ns    | ns |  |  |    | ns |
| 295 | <i>Emilin2</i>  | ns     | ns     | ns    | 1.217 | ns |  |  |    | ns |
| 296 | <i>B3galnt1</i> | 0.95   | 0.95   | ns    | ns    | ns |  |  |    | ns |
| 297 | <i>Stab1</i>    | 1.385  | 0.908  | ns    | ns    | ns |  |  |    | ns |
| 298 | <i>Itgb1</i>    | 0.624  | 1.408  | ns    | ns    | ns |  |  |    | ns |
| 299 | <i>Fabp5</i>    | 0.74   | ns     | ns    | ns    | ns |  |  |    | ns |
| 300 | <i>Tlr4</i>     | ns     | ns     | 0.973 | ns    | ns |  |  |    | ns |
| 301 | <i>Igf1</i>     | 0.946  | 1.636  | 1.135 | ns    | ns |  |  |    | ns |
| 302 | <i>C1qtnf3</i>  | 1.563  | 3.683  | 3.789 | ns    | ns |  |  |    | ns |
| 303 | <i>Vsig4</i>    | 0.653  | 0.683  | 2.94  | ns    | ns |  |  |    | ns |
| 304 | <i>C1qtnf2</i>  | 0.786  | 1.441  | ns    | ns    | ns |  |  |    | ns |
| 305 | <i>Svep1</i>    | 0.9    | 1.248  | ns    | ns    | ns |  |  |    | ns |
| 306 | <i>Twist1</i>   | ns     | 0.61   | ns    | ns    | ns |  |  |    | ns |
| 307 | <i>Anpep</i>    | 1.356  | 1.66   | 1.16  | ns    | ns |  |  |    | ns |
| 308 | <i>Ahr</i>      | 0.859  | ns     | ns    | ns    | ns |  |  |    | ns |
| 309 | <i>Ptn</i>      | 0.729  | 1.634  | ns    | ns    | ns |  |  |    | ns |
| 310 | <i>Olfml3</i>   | 0.783  | ns     | ns    | ns    | ns |  |  |    | ns |
| 311 | <i>Col1a1</i>   | ns     | ns     | 0.814 | ns    | ns |  |  |    | ns |
| 312 | <i>Col4a2</i>   | ns     | 0.653  | ns    | ns    | ns |  |  |    | ns |
| 313 | <i>Lamb1</i>    | 1.056  | 1.354  | ns    | ns    | ns |  |  |    | ns |
| 314 | <i>Ptx3</i>     | 2.819  | 1.114  | ns    | ns    | ns |  |  |    | ns |
| 315 | <i>Serpinf1</i> | ns     | ns     | 0.771 | ns    | ns |  |  |    | ns |
| 316 | <i>Nov</i>      | ns     | 1.09   | 0.733 | ns    |    |  |  | ns | ns |
| 317 | <i>Meox2</i>    | 0.713  | 0.779  | ns    | ns    |    |  |  | ns | ns |
| 318 | <i>Lrrn1</i>    | 1.12   | ns     | ns    | ns    | ns |  |  |    |    |
| 319 | <i>Mcam</i>     | ns     | 0.675  | ns    | ns    | ns |  |  |    |    |
| 320 | <i>Lama4</i>    | 0.787  | 1.099  | ns    | ns    | ns |  |  |    |    |
| 321 | <i>Pck1</i>     | -1.273 | -0.866 | ns    | ns    | ns |  |  | ns | ns |
| 322 | <i>Mest</i>     | 0.924  | 2.6    | ns    | ns    | ns |  |  | ns | ns |
| 323 | <i>Cidec</i>    | ns     | -0.862 | ns    | ns    | ns |  |  | ns | ns |

|     |                  |        |        |        |       |    |    |    |    |    |
|-----|------------------|--------|--------|--------|-------|----|----|----|----|----|
| 324 | <i>Lpl</i>       | ns     | -0.586 | ns     | ns    | ns |    |    | ns | ns |
| 325 | <i>Lair1</i>     | ns     | ns     | 1.192  | ns    | ns |    |    | ns | ns |
| 326 | <i>Nusap1</i>    | ns     | ns     | 1.276  | ns    | ns |    |    | ns | ns |
| 327 | <i>Itga7</i>     | 1.205  | ns     | ns     | ns    | ns |    |    | ns | ns |
| 328 | <i>Hmnr</i>      | ns     | ns     | 1.203  | ns    | ns |    |    | ns | ns |
| 329 | <i>Acacb</i>     | ns     | -0.582 | ns     | ns    | ns |    |    | ns | ns |
| 330 | <i>Aspm</i>      | ns     | ns     | 1.454  | ns    | ns |    |    | ns | ns |
| 331 | <i>Atf3</i>      | 0.731  | ns     | ns     | ns    | ns |    |    | ns | ns |
| 332 | <i>Basp1</i>     | 0.856  | ns     | ns     | ns    | ns |    |    | ns | ns |
| 333 | <i>Col5a1</i>    | 1.335  | 1.927  | 1.279  | 1.118 | ns | ns |    |    |    |
| 334 | <i>Inhba</i>     | 0.922  | 0.857  | 1.451  | ns    | ns | ns |    |    |    |
| 335 | <i>Tnfrsf12a</i> | 1.435  | ns     | ns     | ns    | ns | ns |    |    | ns |
| 336 | <i>Dcn</i>       | ns     | 0.676  | 1.023  | ns    | ns | ns |    |    | ns |
| 337 | <i>Tnfrsf11b</i> | ns     | ns     | 1.298  | ns    | ns | ns |    |    | ns |
| 338 | <i>Lox</i>       | 1.492  | 1.241  | ns     | ns    | ns | ns |    |    | ns |
| 339 | <i>Adam12</i>    | 1.023  | 1.141  | ns     | ns    | ns | ns |    |    | ns |
| 340 | <i>Thbs3</i>     | 0.847  | 1.981  | 2.037  | 1.32  | ns | ns |    |    | ns |
| 341 | <i>Htra1</i>     | ns     | 1.341  | 0.855  | 1.197 | ns | ns |    |    | ns |
| 342 | <i>Fn1</i>       | 0.664  | 1.597  | 2.158  | 1.55  | ns | ns |    |    | ns |
| 343 | <i>Comp</i>      | ns     | 0.988  | 1.087  | 0.837 | ns | ns |    |    | ns |
| 344 | <i>Crlf1</i>     | 2.668  | 2.306  | ns     | ns    | ns | ns |    |    | ns |
| 345 | <i>Ogn</i>       | ns     | 1.129  | ns     | ns    | ns | ns |    |    | ns |
| 346 | <i>Dio2</i>      | ns     | ns     | 1.947  | ns    | ns | ns |    | ns |    |
| 347 | <i>Susd5</i>     | ns     | ns     | 1.392  | ns    | ns | ns |    | ns | ns |
| 348 | <i>Ibsp</i>      | ns     | ns     | 1.863  | ns    | ns | ns |    |    | ns |
| 349 | <i>Col9a1</i>    | -0.587 | ns     | ns     | ns    | ns | ns |    |    | ns |
| 350 | <i>Mfap2</i>     | ns     | 1.56   | ns     | ns    | ns | ns |    |    | ns |
| 351 | <i>Sulf1</i>     | 1.194  | 1.561  | 1.051  | ns    | ns | ns |    |    | ns |
| 352 | <i>Col12a1</i>   | ns     | 1.428  | 1.059  | ns    | ns | ns |    |    | ns |
| 353 | <i>Thbs4</i>     | 1.074  | 1.174  | ns     | ns    | ns | ns |    |    | ns |
| 354 | <i>Cx3cr1</i>    | 1.039  | ns     | ns     | ns    | ns | ns |    |    | ns |
| 355 | <i>Col6a3</i>    | 1.165  | 2.133  | 1.652  | 1.256 | ns | ns |    | ns | ns |
| 356 | <i>Col16a1</i>   | 0.784  | 1.293  | 1.097  | ns    | ns | ns |    |    | ns |
| 357 | <i>Prelp</i>     | ns     | 1.106  | 1.44   | ns    | ns | ns | ns |    |    |
| 358 | <i>Fmod</i>      | ns     | 1.025  | ns     | ns    | ns | ns | ns |    |    |
| 359 | <i>Vwa1</i>      | ns     | 0.863  | -1.368 | ns    | ns | ns | ns |    | ns |
| 360 | <i>Ltbp3</i>     | ns     | 1.006  | ns     | ns    | ns | ns | ns |    | ns |
| 361 | <i>F5</i>        | ns     | ns     | 1.291  | ns    | ns | ns | ns |    | ns |
| 362 | <i>Angptl4</i>   | 1.959  | 0.833  | ns     | 1.304 | ns | ns | ns |    | ns |
| 363 | <i>Htra3</i>     | ns     | 1.127  | ns     | ns    | ns | ns | ns |    | ns |
| 364 | <i>Ism1</i>      | ns     | 0.707  | ns     | ns    | ns | ns | ns |    | ns |
| 365 | <i>Fgf7</i>      | 0.847  | ns     | ns     | ns    | ns | ns | ns |    | ns |
| 366 | <i>Angptl7</i>   | ns     | -0.722 | ns     | ns    | ns | ns | ns |    | ns |
| 367 | <i>Myot</i>      | ns     | -0.704 | ns     | ns    | ns | ns | ns |    | ns |
| 368 | <i>Fzd9</i>      | ns     | ns     | -0.785 | ns    | ns | ns | ns |    | ns |
| 369 | <i>Cyt11</i>     | -1.407 | -1.502 | ns     | ns    | ns | ns | ns |    | ns |
| 370 | <i>Ppp1r3c</i>   | ns     | -0.629 | ns     | ns    | ns | ns | ns |    | ns |
| 371 | <i>Slc38a3</i>   | ns     | -0.625 | ns     | ns    | ns | ns | ns |    | ns |
| 372 | <i>Sobp</i>      | ns     | ns     | -1.04  | ns    | ns | ns | ns |    | ns |
| 373 | <i>Metrn</i>     | ns     | ns     | -0.698 | ns    | ns | ns | ns |    | ns |
| 374 | <i>Tdrp</i>      | ns     | -0.636 | ns     | ns    | ns | ns | ns |    | ns |
| 375 | <i>Zswim7</i>    | ns     | -0.593 | ns     | ns    | ns | ns | ns |    | ns |
| 376 | <i>Cpeb1</i>     | ns     | ns     | -1.183 | ns    | ns | ns | ns |    | ns |
| 377 | <i>Slc47a1</i>   | -0.923 | -0.962 | ns     | ns    | ns | ns | ns |    | ns |
| 378 | <i>Timp4</i>     | -0.961 | -0.747 | ns     | ns    | ns | ns | ns |    | ns |
| 379 | <i>Dgat2</i>     | -0.595 | ns     | ns     | ns    | ns | ns | ns |    | ns |
| 380 | <i>Slc2a4</i>    | ns     | -0.642 | ns     | ns    | ns | ns | ns |    | ns |
| 381 | <i>Mmm1</i>      | ns     | ns     | 1.099  | ns    | ns | ns | ns |    | ns |
| 382 | <i>Lyve1</i>     | ns     | ns     | 1.111  | ns    | ns | ns | ns |    | ns |
| 383 | <i>Fasn</i>      | -1.247 | ns     | ns     | ns    | ns | ns | ns |    | ns |
| 384 | <i>Gpd1</i>      | -0.771 | ns     | ns     | ns    | ns | ns | ns |    | ns |
| 385 | <i>Rbp4</i>      | ns     | 0.682  | ns     | ns    | ns | ns | ns |    | ns |
| 386 | <i>Thrsp</i>     | -1.394 | -0.782 | ns     | ns    | ns | ns | ns |    | ns |
| 387 | <i>Mlxipl</i>    | ns     | -0.669 | ns     | ns    | ns | ns | ns |    | ns |
| 388 | <i>Atp1a2</i>    | ns     | -0.666 | ns     | ns    | ns | ns | ns |    | ns |
| 389 | <i>Hspb7</i>     | 1.193  | -0.97  | ns     | ns    | ns | ns | ns |    | ns |
| 390 | <i>Ppp1r1a</i>   | ns     | -0.657 | ns     | ns    | ns | ns | ns |    | ns |

|     |                 |           |           |           |           |           |           |  |           |           |
|-----|-----------------|-----------|-----------|-----------|-----------|-----------|-----------|--|-----------|-----------|
| 391 | <i>Cryab</i>    | 0.851     | -0.635    | <i>ns</i> | <i>ns</i> | <i>ns</i> | <i>ns</i> |  | <i>ns</i> | <i>ns</i> |
| 392 | <i>Pfkfb1</i>   | -0.872    | -0.617    | <i>ns</i> | <i>ns</i> | <i>ns</i> | <i>ns</i> |  | <i>ns</i> | <i>ns</i> |
| 393 | <i>Cenpf</i>    | <i>ns</i> | <i>ns</i> | 1.558     | <i>ns</i> | <i>ns</i> | <i>ns</i> |  | <i>ns</i> | <i>ns</i> |
| 394 | <i>Alpk3</i>    | <i>ns</i> | -0.831    | <i>ns</i> | <i>ns</i> | <i>ns</i> | <i>ns</i> |  | <i>ns</i> | <i>ns</i> |
| 395 | <i>Ctf1</i>     | <i>ns</i> | <i>ns</i> | -1.838    | <i>ns</i> | <i>ns</i> | <i>ns</i> |  | <i>ns</i> | <i>ns</i> |
| 396 | <i>Cdca5</i>    | <i>ns</i> | <i>ns</i> | <i>ns</i> | 0.974     | <i>ns</i> | <i>ns</i> |  | <i>ns</i> | <i>ns</i> |
| 397 | <i>Arhgap20</i> | <i>ns</i> | <i>ns</i> | <i>ns</i> | -0.704    | <i>ns</i> | <i>ns</i> |  | <i>ns</i> | <i>ns</i> |
| 398 | <i>Ampd1</i>    | -0.698    | <i>ns</i> | <i>ns</i> | <i>ns</i> | <i>ns</i> | <i>ns</i> |  | <i>ns</i> | <i>ns</i> |
| 399 | <i>Casc5</i>    | <i>ns</i> | <i>ns</i> | 1.323     | <i>ns</i> | <i>ns</i> | <i>ns</i> |  | <i>ns</i> | <i>ns</i> |
