# Supplementary material for: Global molecular changes in a tibial compression induced ACL rupture model of post‐traumatic osteoarthritis
Source: PubMed Central journal article supplement — J Orthop Res. 2016 May 10;35(3):474–85. doi: 10.1002/jor.23263 (PMC5363336; doi:10.1002/jor.23263), 2016-05-10
Supplement: JOR-35-474-s002.pdf [file JOR-35-474-s002.pdf]

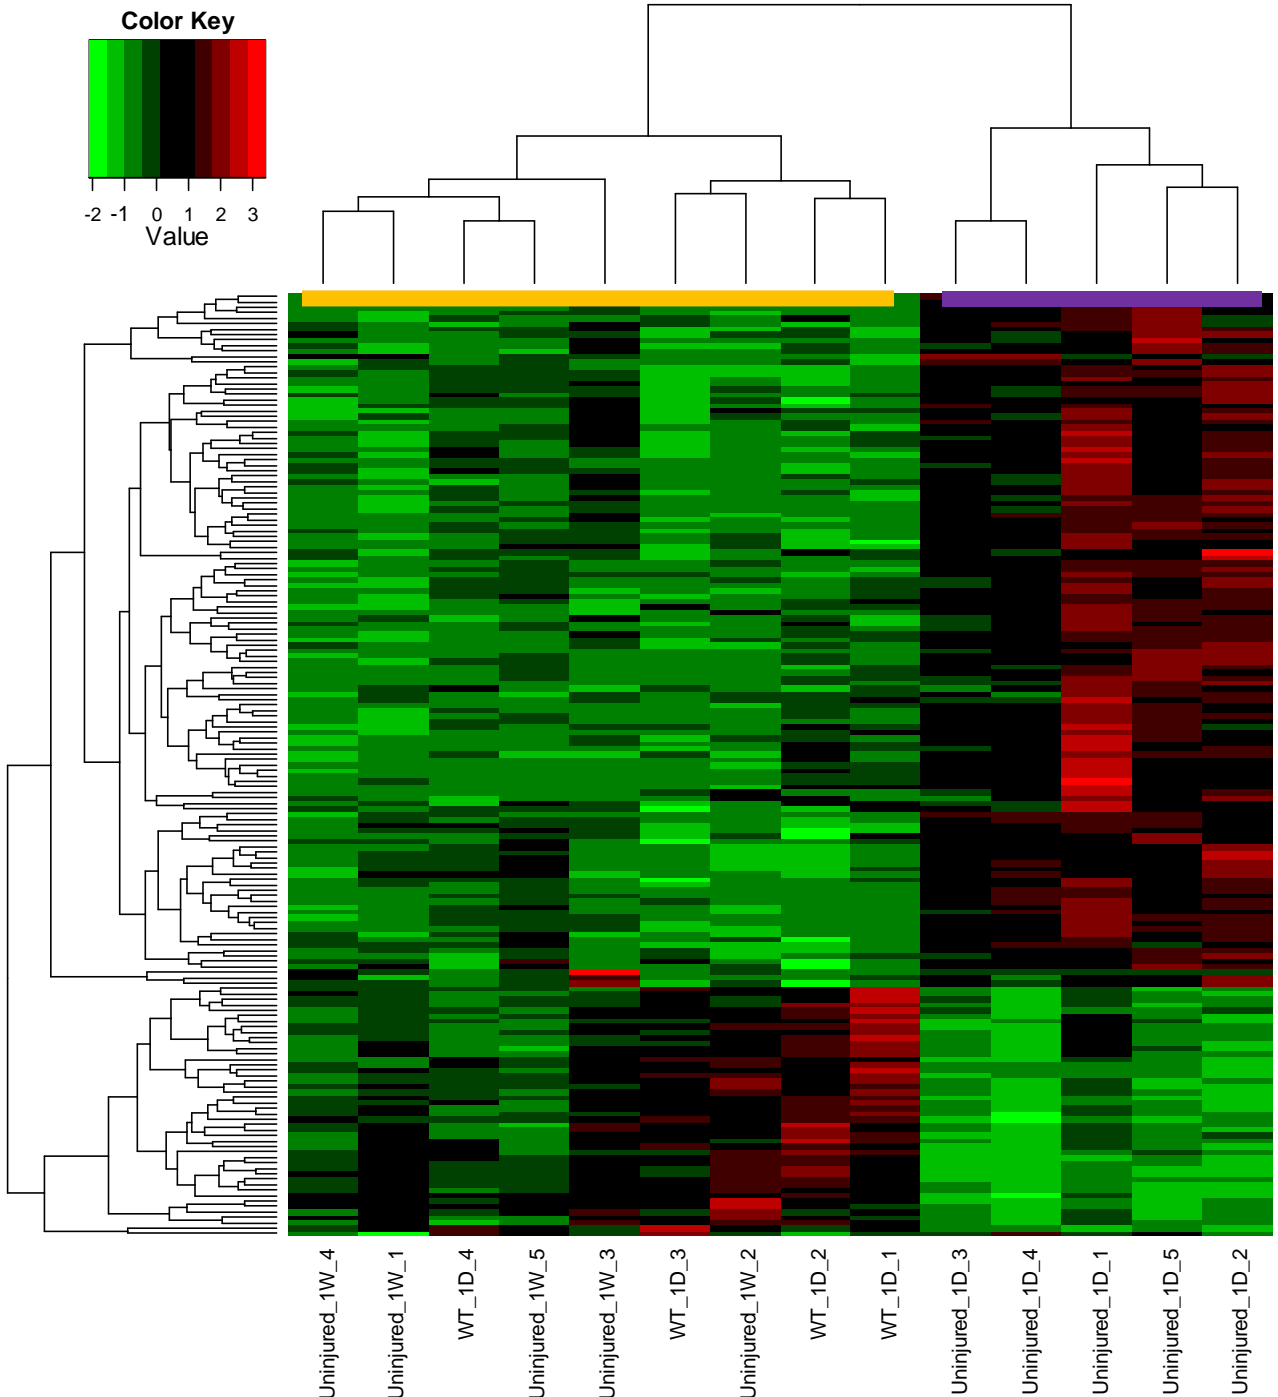

**Supplementary Figure 1.**

Gene expression changes in contralateral joints compared to age matched wildtype controls. We compared 1 day contralateral joints to age matched (mice at 16 weeks of age + 1 day) uninjured controls (C57Bl6) and found that several genes up/down regulated in injured joints in response to injury were also up/down regulated in contralateral joints compared to age matched WT controls. However, by 1 week post injury the expression of the majority of these genes reverted back to WT control levels. Heatmap shows a set of genes differentially expressed between 1 day contralateral (uninjured\_1D) and age matched WT controls (WT\_1D). For majority of these genes 1 week contralateral (uninjured\_1W) had very similar expression as the WT controls. This suggests that at least at early time points OA related genes have very similar expression in contralateral and age matched controls, even though some of these genes show a differential expression immediately post injury.
